# Supplementary material for: Ugi 4-CR synthesis of γ- and δ-lactams providing new access to diverse enzyme interactions, a PDB analysis
Source: Royal Society of Chemistry journal article supplement (doi:10.1039/c4md00162a), 2014-01-01

## Supporting Information

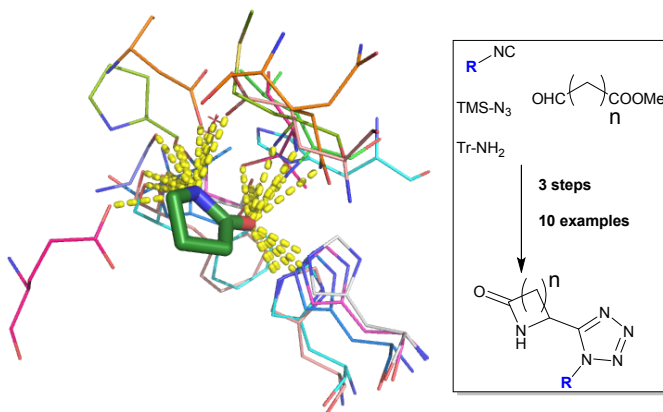

### Ugi 4-CR Synthesis of $\gamma$ - and $\delta$ -Lactams

André Boltjes,<sup>a</sup> George P. Liao,<sup>a</sup> Ting Zhao,<sup>a</sup> Eberhardt Herdtweck,<sup>b</sup> and Alexander Dömling<sup>†\*a,c</sup>

<sup>[a]</sup>Department of Drug Design, University of Groningen, The Netherlands <sup>[b]</sup>Technische Universität München  
<sup>[c]</sup>University of Pittsburgh

Email: [A.S.S.Domling@rug.nl](mailto:A.S.S.Domling@rug.nl)

## Table of Contents

|                                                                                       |    |
|---------------------------------------------------------------------------------------|----|
| General .....                                                                         | 2  |
| Synthetic Procedures and characterization data for compounds 5a-j and 6a-j .....      | 3  |
| <sup>1</sup> H NMR and <sup>13</sup> C NMR spectra of compounds 5a-j and 6a-j .....   | 8  |
| Single Crystal X-Ray Structure Determination of Compounds 6b, 6e, 6f, and 6j .....    | 28 |
| SFC-MS Chromatograms of compounds 6a-j .....                                          | 37 |
| PDB Analysis – Interaction distances of gamma lactams found in the PDB database ..... | 47 |

## General

All isonitriles were made in house by either performing the Hoffman or Ugi procedure. Other reagents were purchased from Sigma Aldrich, ABCR, Acros and AK Scientific and were used without further purification. All microwave irradiation reactions were carried out in a Biotage Initiator™ Microwave Synthesizer. The Ugi tetrazoles were purified by flash chromatography, on a Teledyne ISCO Rf 200, using RediSep Rf Normal-phase Silica Flash Columns (Silica Gel 60 Å, 230 - 400 mesh) unless otherwise noted. Column chromatography was performed with MP Ecochrom Silica Gel 32–63, 60 Å. <sup>1</sup>H (500 MHz) and <sup>13</sup>C (125 MHz) NMR spectra were recorded on a Bruker Avance DRX 500. Chemical shift values are reported as part per million (δ) relative to residual solvent peaks (CDCl<sub>3</sub>, <sup>1</sup>H δ = 7.26, <sup>13</sup>C δ = 77.16 or TMS <sup>1</sup>H δ = 0.00 ppm). The coupling constants (J) are reported in Hertz (Hz). Electrospray ionization mass spectra were measured on an API 3000 triple-quadrupole mass spectrometer (Applied Biosystems/MDS Sciex) via a TurboIonSpray source. Data collected and analyzed by the Analyst 1.5 data acquisition software (Applied Biosystems/MDS Sciex).

Crystallographic data were collected on an X-ray single crystal diffractometer equipped with a CCD detector (Bruker APEX II, κ-CCD), a fine focus sealed tube (Bruker AXS, D8) with MoK<sub>α</sub> radiation (λ = 0.71073 Å), and a graphite monochromator by using the SMART software package. [1] The measurements were performed on single crystals coated with perfluorinated ether. The crystals were fixed on the top of a cactus prickle (*Opuntia ficus-india*) with perfluorinated ether and transferred to the diffractometer. The crystals were frozen under a stream of cold nitrogen. A matrix scan was used to determine the initial lattice parameters. Reflections were merged and corrected for Lorenz and polarization effects, scan speed, and background using SAINT. [2] Absorption corrections, including odd and even ordered spherical harmonics were performed using SADABS. [2] Space group assignments were based upon systematic absences, *E* statistics, and successful refinement of the structures. Structures were solved by direct methods with the aid of successive difference Fourier maps, and were refined against all data using WinGX [7] based on SIR-92. [3] If not mentioned otherwise, non-hydrogen atoms were refined with anisotropic displacement parameters. Hydrogen atoms could be located in the difference Fourier maps and were allowed to refine freely. Full-matrix least-squares refinements were carried out by minimizing  $\sum w(F_o^2 - F_c^2)^2$  with SHELXL-97 [5] weighting scheme. Neutral atom scattering factors for all atoms and anomalous dispersion corrections for the non-hydrogen atoms were taken from *International Tables for Crystallography*. [4] Images of the crystal structures were generated by PLATON. [6] CCDC 961190 (**6b**), CCDC 961191 (**6e**), CCDC 961188 (**6f**), and CCDC 961189 (**6j**) contains the supplementary crystallographic data for this compound. This data can be obtained free of charge from The Cambridge Crystallographic Data Centre via [www.ccdc.cam.ac.uk/data\\_request/cif](http://www.ccdc.cam.ac.uk/data_request/cif) or via [https://www.ccdc.cam.ac.uk/services/structure\\_deposit/](https://www.ccdc.cam.ac.uk/services/structure_deposit/)

## Synthetic Procedures and characterization data for compounds 5a-j and 6a-j

### Synthetic procedure 1

Aldehyde (1 mmol), tritylamine (1 mmol) were mixed in methanol (1 mL) and subjected to microwave irradiation for 15 minutes. Subsequently azidotrimethylsilane (1 mmol) and isonitrile (1mmol) were added and the mixture was again subjected to microwave irradiation for 15 minutes at 100°C. The solvent was evaporated under reduced pressure and the residue was purified using flash chromatography to obtain the product.

### Synthetic procedure 2

To a solution of Ugi tetrazole (0.5-1.0 mmol) in 3 mL CH<sub>2</sub>Cl<sub>2</sub> was added TFA (150 μL, 2 mmol). After 1 minute the mixture was filtered through a silica bed washing with 50 mL Heptane:EtOAc 1:1 (v/v) to remove the trityl cation impurity. The amine was collected by washing the silica bed with 50 mL CH<sub>2</sub>Cl<sub>2</sub>:MeOH 1:1 (v/v). The mixture was concentrated under reduced pressure and redissolved in dry THF (3 mL). Sodium hydride (5 mmol) was washed with heptanes prior to addition. After 4 hours of stirring, EtOH was added to quench the reaction. The solvents were removed under reduced pressure, and the residue was purified by column chromatography using CH<sub>2</sub>Cl<sub>2</sub>:MeOH 20:1 (v/v) to afford the lactam.

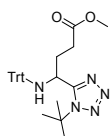

**Methyl 4-(1-(tert-butyl)-1H-tetrazol-5-yl)-4-(tritylamino)butanoate (5a):** The product was obtained using procedure 1 starting from *t*-butylisocyanide and **3a** as a white solid (354 mg, 73%): *R<sub>f</sub>* 0.50 (EtOAc:Hept 1:1). <sup>1</sup>H NMR (500MHz, CDCl<sub>3</sub>): δ 7.40 (d, *J* = 7.5, 6H), 7.19 (t, *J* = 7.5, 9H), 7.13 (t, *J* = 7.2, 3H), 4.41 (s, 1H), 3.63 (s, 3H), 3.49 (s, 1H), 2.80 – 2.67 (m, 1H), 2.49 – 2.34 (m, 1H), 2.28 – 2.22 (m, 1H), 1.87 – 1.80 (m, 1H), 1.42 (s, 9H) ppm. <sup>13</sup>C NMR (125 MHz, CDCl<sub>3</sub>) δ 173.7, 156.8, 145.6, 128.9, 127.9, 126.7, 71.7, 61.8, 51.8, 48.4, 32.3, 29.9, 28.3 ppm. HRMS (ESI): *m/z*, calcd. for C<sub>26</sub>H<sub>37</sub>O<sub>2</sub>N<sub>5</sub>Na [M + Na<sup>+</sup>]: 506.2527, found 506.2529.

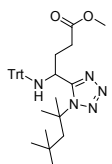

**Methyl 4-(1-(2,4,4-trimethylpentan-2-yl)-1H-tetrazol-5-yl)-4-(tritylamino)butanoate (5b):** The product was obtained using procedure starting from *t*-octylisocyanide and **3a** as a white solid (269 mg, 50%): *R<sub>f</sub>* 0.50 (EtOAc:Hept 1:1). <sup>1</sup>H NMR (500 MHz, CDCl<sub>3</sub>) δ 7.39 (d, *J* = 7.5, 6H), 7.19 (t, *J* = 7.5, 6H), 7.14 (t, *J* = 7.2, 3H), 4.50 – 4.40 (m, 1H), 3.62 (s, 3H), 3.54 (d, *J* = 9.0, 1H), 2.74 – 2.60 (m, 1H), 2.35 – 2.25 (m, 1H), 2.20 – 2.13 (m, 1H), 1.90 – 1.83 (m, 1H), 1.73 (q, *J* = 14.8, 2H), 1.52 (s, 3H), 1.43 (s, 3H), 0.81 (s, 9H) ppm. <sup>13</sup>C NMR (125 MHz, CDCl<sub>3</sub>) δ 173.6, 157.0, 145.7, 129.0, 127.9, 126.8, 71.7, 66.1, 55.2, 51.7, 48.6, 32.2, 31.6, 31.1, 29.9, 28.5, 28.4 ppm. HRMS (ESI): *m/z*, calcd. for C<sub>33</sub>H<sub>41</sub>O<sub>2</sub>N<sub>5</sub>Na [M + Na<sup>+</sup>]: 562.3153, found 562.3154.

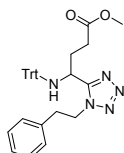

**Methyl 4-(1-phenethyl-1H-tetrazol-5-yl)-4-(tritylamino)butanoate (5c):** The product was obtained using procedure 1 starting from phenethylisocyanide and **3a** as a white solid (398 mg, 75%): *R<sub>f</sub>* 0.31 (EtOAc:Hept 1:2). <sup>1</sup>H NMR (500 MHz, CDCl<sub>3</sub>) δ 7.35 (d, *J* = 7.5, 6H), 7.27 – 7.09 (m, 13H), 7.00 (d, *J* = 7.2, 2H), 4.02 – 3.84 (m, 2H), 3.81 – 3.71 (m, 1H), 3.64 (s, 3H), 3.15 – 2.96 (m, 3H), 2.56 – 2.40 (m, 1H), 2.18 – 2.02 (m, 1H), 1.93 – 1.87 (m, 1H), 1.43 – 1.37 (m, 1H) ppm. <sup>13</sup>C NMR (125 MHz, CDCl<sub>3</sub>) δ 173.33, 157.14, 145.15, 136.69, 128.96, 128.81, 128.62, 127.98, 127.32, 126.84, 71.59, 51.76, 48.56, 47.01, 35.43, 31.76, 29.01 ppm. HRMS (ESI): *m/z*, calcd. for C<sub>33</sub>H<sub>33</sub>O<sub>2</sub>N<sub>5</sub>Na [M + Na<sup>+</sup>]: 554.2527, found 554.2528.

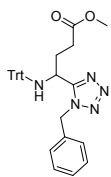

**Methyl 4-(1-benzyl-1H-tetrazol-5-yl)-4-(tritylamino)butanoate (5d):** The product was obtained using procedure 1 starting from benzylisocyanide and **3a** as a white solid (290 mg, 56%):  $R_f$  0.50 (EtOAc:Hept 1:1).  $^1\text{H}$  NMR (500 MHz,  $\text{CDCl}_3$ )  $\delta$  7.32 (d,  $J = 8.1$ , 6H), 7.24 – 7.27 (m, 3H), 7.20 – 7.11 (m, 9H), 7.05 (d,  $J = 6.7$ , 2H), 5.21 (d,  $J = 15.3$ , 1H), 4.76 (d,  $J = 15.3$ , 1H), 4.14 – 4.10 (m, 1H), 3.58 (s, 3H), 3.00 (d,  $J = 9.2$ , 1H), 2.47 – 2.41 (m, 1H), 2.20 – 2.07 (m, 1H), 1.96 – 1.89 (m, 1H), 1.59 – 1.53 (m, 1H), 1.33 – 1.24 (m, 1H) ppm.  $^{13}\text{C}$  NMR (125 MHz,  $\text{CDCl}_3$ )  $\delta$  173.31, 157.08, 145.21, 133.28, 129.14, 128.92, 128.58, 128.03, 128.00, 126.83, 71.49, 51.73, 50.82, 47.06, 31.50, 28.86 ppm. HRMS (ESI):  $m/z$ , calcd. for  $\text{C}_{32}\text{H}_{31}\text{O}_2\text{N}_5\text{Na}$  [ $\text{M} + \text{Na}^+$ ]: 540.2372, found 540.2372.

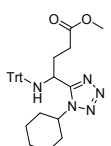

**Methyl 4-(1-cyclohexyl-1H-tetrazol-5-yl)-4-(tritylamino)butanoate (5e):** The product was obtained using procedure 1 starting from cyclohexylisocyanide and **3a** as a white solid (203 mg, 40%):  $R_f$  0.50 (EtOAc:Hept 1:1).  $^1\text{H}$  NMR (500 MHz,  $\text{CDCl}_3$ )  $\delta$  7.40 (d,  $J = 8.1$ , 6H), 7.20 (t,  $J = 7.5$ , 6H), 7.15 (t,  $J = 6.8$ , 3H), 4.16 – 4.02 (m, 1H), 3.78 – 3.68 (m, 1H), 3.61 (s, 3H), 3.12 (d,  $J = 8.3$ , 1H), 2.68 – 2.49 (m, 1H), 2.34 – 2.13 (m, 2H), 1.96 – 1.76 (m, 4H), 1.76 – 1.57 (m, 4H), 1.37 – 1.18 (m, 3H) ppm.  $^{13}\text{C}$  NMR (125 MHz,  $\text{CDCl}_3$ )  $\delta$  173.33, 156.11, 145.39, 128.74, 127.97, 126.85, 71.80, 57.45, 51.77, 47.09, 33.59, 32.02, 31.99, 28.88, 25.34, 25.29, 24.80 ppm. HRMS (ESI):  $m/z$ , calcd. for  $\text{C}_{31}\text{H}_{35}\text{O}_2\text{N}_5\text{Na}$  [ $\text{M} + \text{Na}^+$ ]: 532.2683, found 532.2685.

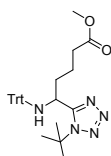

**Methyl 5-(1-(tert-butyl)-1H-tetrazol-5-yl)-5-(tritylamino)pentanoate (5f):** The product was obtained using procedure 1 starting from *t*-butylisocyanide and **3b** as a white solid (389 mg, 78%):  $R_f$  0.50 (EtOAc:Hept 1:1).  $^1\text{H}$  NMR (500 MHz,  $\text{CDCl}_3$ )  $\delta$  7.43 (d,  $J = 8.0$ , 6H), 7.20 (t,  $J = 7.5$ , 6H), 7.13 (t,  $J = 7.0$ , 3H), 4.34 – 4.25 (m, 1H), 3.62 (s, 3H), 3.40 (d,  $J = 9.3$ , 1H), 2.25 (t,  $J = 6.9$ , 2H), 1.94 – 1.70 (m, 2H), 1.64 – 1.48 (m, 2H), 1.41 (s, 9H) ppm.  $^{13}\text{C}$  NMR (125 MHz,  $\text{CDCl}_3$ )  $\delta$  173.47, 157.18, 145.78, 128.95, 127.91, 126.69, 71.75, 61.64, 51.57, 49.33, 37.13, 33.91, 30.02, 19.88 ppm. HRMS (ESI):  $m/z$ , calcd. for  $\text{C}_{30}\text{H}_{35}\text{O}_2\text{N}_5\text{Na}$  [ $\text{M} + \text{Na}^+$ ]: 520.2683, found 520.2686.

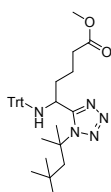

**Methyl 5-(1-(2,4,4-trimethylpentan-2-yl)-1H-tetrazol-5-yl)-5-(tritylamino)pentanoate (5g):** The product was obtained using procedure 1 starting from *t*-octylisocyanide and **3b** as a white solid (343 mg, 62%):  $R_f$  0.50 (EtOAc:Hept 1:1).  $^1\text{H}$  NMR (500 MHz,  $\text{CDCl}_3$ )  $\delta$  7.43 (d,  $J = 7.5$ , 6H), 7.21 (t,  $J = 7.5$ , 6H), 7.14 (t,  $J = 7.2$ , 3H), 4.42 – 4.25 (m, 1H), 3.61 (s, 2H), 3.39 (d,  $J = 8.9$ , 1H), 2.29 – 2.08 (m, 2H), 1.82 – 1.65 (m, 4H), 1.64 – 1.53 (m, 1H), 1.52 – 1.41 (m, 7H), 0.81 (s, 9H) ppm.  $^{13}\text{C}$  NMR (125 MHz,  $\text{CDCl}_3$ )  $\delta$  173.4, 157.2, 145.9, 129.0,

127.9, 126.7, 71.7, 66.0, 55.2, 51.6, 49.6, 36.6, 33.9, 31.6, 31.1, 30.0, 28.5, 19.9 ppm. HRMS (ESI):  $m/z$ , calcd. for  $C_{34}H_{43}O_2N_5Na$  [ $M + Na^+$ ]: 576.3309, found 576.3310.

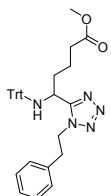

**Methyl 5-(1-phenethyl-1H-tetrazol-5-yl)-5-(tritylamino)pentanoate (5h):** The product was obtained using procedure 1 starting from phenethylisocyanide and **3b** as a white solid (235 mg, 43%):  $R_f$  0.50 (EtOAc:Hept 1:1).  $^1H$  NMR (500 MHz,  $CDCl_3$ )  $\delta$  7.35 (d,  $J = 7.6$ , 6H), 7.29 – 7.21 (m, 3H), 7.19 (t,  $J = 7.4$ , 6H), 7.16 – 7.10 (m, 3H), 7.00 (d,  $J = 6.5$ , 2H), 4.04 – 3.92 (m, 1H), 3.85 – 3.69 (m, 2H), 3.65 (s, 3H), 3.13 – 2.99 (m, 2H), 2.93 (d,  $J = 8.3$ , 1H), 2.19 – 2.01 (m, 2H), 1.62 – 1.48 (m, 1H), 1.42 – 1.30 (m, 2H), 1.25 – 1.14 (m, 1H) ppm.  $^{13}C$  NMR (125 MHz,  $CDCl_3$ )  $\delta$  173.3, 157.4, 145.2, 136.8, 129.0, 128.8, 128.6, 128.0, 127.3, 126.8, 71.7, 51.6, 48.7, 48.0, 36.4, 35.5, 33.6, 20.3 ppm. HRMS (ESI):  $m/z$ , calcd. for  $C_{34}H_{35}O_2N_5Na$  [ $M + Na^+$ ]: 568.2683, found 568.2685.

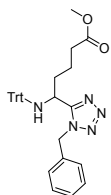

**Methyl 5-(1-benzyl-1H-tetrazol-5-yl)-5-(tritylamino)pentanoate (5i):** The product was obtained using procedure 1 starting from benzylisocyanide and **3b** as a white solid (364 mg, 68%):  $R_f$  0.50 (EtOAc:Hept 1:1).  $^1H$  NMR (500 MHz,  $CDCl_3$ )  $\delta$  7.36 (d,  $J = 7.4$ , 6H), 7.31 – 7.24 (m, 3H), 7.21 (t,  $J = 7.3$ , 6H), 7.19 – 7.13 (m, 3H), 7.01 (d,  $J = 5.5$ , 2H), 5.29 (d,  $J = 15.4$ , 1H), 4.68 (d,  $J = 15.4$ , 1H), 4.02 – 3.91 (m, 1H), 3.58 (s, 3H), 2.87 (d,  $J = 8.3$ , 1H), 1.96 (t,  $J = 6.9$ , 2H), 1.54 – 1.43 (m, 1H), 1.32 – 1.16 (m, 3H) ppm.  $^{13}C$  NMR (125 MHz,  $CDCl_3$ )  $\delta$  173.1, 157.3, 145.3, 133.6, 129.1, 128.9, 128.6, 128.0, 127.7, 126.9, 71.6, 51.5, 50.9, 48.0, 36.1, 33.6, 20.2 ppm. HRMS (ESI):  $m/z$ , calcd. for  $C_{33}H_{33}O_2N_5Na$  [ $M + Na^+$ ]: 554.2527, found 554.2527.

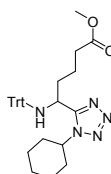

**Methyl 5-(1-cyclohexyl-1H-tetrazol-5-yl)-5-(tritylamino)pentanoate (5j):** The product was obtained using procedure 1 starting from cyclohexylisocyanide and **3b** as a white solid (214 mg, 41%):  $R_f$  0.50 (EtOAc:Hept 1:1).  $^1H$  NMR (500 MHz,  $CDCl_3$ )  $\delta$  7.41 (d,  $J = 7.5$ , 6H), 7.21 (t,  $J = 7.5$ , 6H), 7.15 (t,  $J = 7.2$ , 3H), 4.07 – 3.95 (m, 1H), 3.89 – 3.75 (m, 1H), 3.60 (s, 3H), 2.90 (d,  $J = 7.3$ , 1H), 2.22 – 2.06 (m, 2H), 1.96 – 1.62 (m, 8H), 1.58 – 1.45 (m, 1H), 1.43 – 1.19 (m, 5H) ppm.  $^{13}C$  NMR (125 MHz,  $CDCl_3$ )  $\delta$  173.3, 156.3, 145.5, 128.8, 128.0, 126.9, 72.0, 57.6, 51.6, 48.1, 36.4, 33.6, 33.6, 32.3, 25.4, 24.9, 20.3 ppm. HRMS (ESI):  $m/z$ , calcd. for  $C_{32}H_{37}O_2N_5Na$  [ $M + Na^+$ ]: 546.2840, found 546.2841.

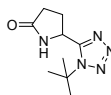

**5-(1-(tert-butyl)-1H-tetrazol-5-yl)pyrrolidin-2-one (6a):** The product was obtained using procedure 2 starting

from **5a** as a white solid (74 mg, 55%):  $^1\text{H}$  NMR (500 MHz,  $\text{CDCl}_3$ )  $\delta$  7.69 (s, 1H), 5.40 – 5.13 (m, 1H), 2.75 – 2.57 (m, 2H), 2.43 – 2.31 (m, 2H), 1.80 – 1.75 (m, 9H) ppm.  $^{13}\text{C}$  NMR (125 MHz,  $\text{CDCl}_3$ )  $\delta$  178.7, 155.8, 61.6, 49.1, 30.3, 29.3, 28.1 ppm. HRMS (ESI):  $m/z$ , calcd. for  $\text{C}_9\text{H}_{16}\text{O}_1\text{N}_5$  [ $\text{M} + \text{H}^+$ ]: 210.1349, found 210.1350.

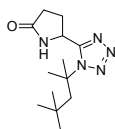

**5-(1-(2,4,4-trimethylpentan-2-yl)-1H-tetrazol-5-yl)pyrrolidin-2-one (6b):** The product was obtained using procedure 2 starting from **5b** as a white solid (154 mg, 89%):  $^1\text{H}$  NMR (500 MHz,  $\text{CDCl}_3$ )  $\delta$  7.75 (s, 1H), 5.35 – 5.20 (m, 1H), 2.78 – 2.56 (m, 2H), 2.46 – 2.31 (m, 2H), 1.97 (q,  $J = 15.3$ , 2H), 1.86 (d,  $J = 3.4$ , 6H), 0.79 (s, 9H) ppm.  $^{13}\text{C}$  NMR (125 MHz,  $\text{CDCl}_3$ )  $\delta$  178.7, 156.3, 65.0, 54.3, 49.3, 31.8, 30.8, 30.5, 29.4, 28.2 ppm. HRMS (ESI):  $m/z$ , calcd. for  $\text{C}_{13}\text{H}_{24}\text{O}_1\text{N}_5$  [ $\text{M} + \text{H}^+$ ]: 266.1975, found 266.1977.

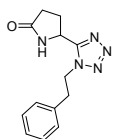

**5-(1-phenethyl-1H-tetrazol-5-yl)pyrrolidin-2-one (6c):** The product was obtained using procedure 2 starting from **5c** as a white solid (60 mg, 32%):  $^1\text{H}$  NMR (500 MHz,  $\text{CDCl}_3$ )  $\delta$  7.28 (d,  $J = 4.2$ , 3H), 7.06 – 6.91 (m, 2H), 6.82 (s, 1H), 4.71 – 4.46 (m, 2H), 4.44 – 4.25 (m, 1H), 3.37 – 3.11 (m, 2H), 2.54 – 2.37 (m, 1H), 2.33 – 2.08 (m, 2H), 2.08 – 1.87 (m, 1H) ppm.  $^{13}\text{C}$  NMR (125 MHz,  $\text{CDCl}_3$ )  $\delta$  178.3, 155.8, 136.6, 129.3, 129.0, 127.8, 49.3, 47.2, 36.4, 29.3, 26.5 ppm. MS (ESI) ( $m/z$ ) 258.1 [ $\text{M} + \text{H}^+$ ] $^+$ . HRMS (ESI):  $m/z$ , calcd. for  $\text{C}_{13}\text{H}_{16}\text{O}_1\text{N}_5$  [ $\text{M} + \text{H}^+$ ]: 258.1349, found 258.1348.

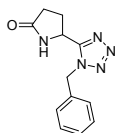

**5-(1-benzyl-1H-tetrazol-5-yl)pyrrolidin-2-one (6d):** The product was obtained using procedure 2 starting from **5d** as a white solid (98 mg, 72%):  $^1\text{H}$  NMR (500 MHz,  $\text{CDCl}_3$ )  $\delta$  7.83 (s, 1H), 7.37 (d,  $J = 6.3$ , 3H), 7.28 – 7.17 (m, 2H), 5.67 (dd,  $J = 47.8$ , 15.6, 2H), 5.02 – 4.88 (m, 1H), 2.44 – 2.33 (m, 1H), 2.33 – 2.18 (m, 2H), 2.05 – 1.90 (m, 1H) ppm.  $^{13}\text{C}$  NMR (126 MHz,  $\text{CDCl}_3$ )  $\delta$  178.7, 155.5, 133.3, 129.4, 129.2, 127.7, 51.3, 47.9, 29.2, 26.3 ppm. HRMS (ESI):  $m/z$ , calcd. for  $\text{C}_{12}\text{H}_{14}\text{O}_1\text{N}_5$  [ $\text{M} + \text{H}^+$ ]: 244.1193, found 244.1192.

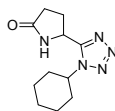

**5-(1-cyclohexyl-1H-tetrazol-5-yl)pyrrolidin-2-one (6e):** The product was obtained using procedure 2 starting from **5e** as a white solid (110 mg, 95%):  $^1\text{H}$  NMR (500 MHz,  $\text{CDCl}_3$ )  $\delta$  7.84 (d,  $J = 26.2$ , 1H), 5.18 – 4.93 (m, 1H), 4.37 – 4.14 (m, 1H), 2.74 – 2.55 (m, 2H), 2.53 – 2.33 (m, 2H), 2.13 – 1.91 (m, 6H), 1.78 (d,  $J = 12.7$ , 1H), 1.53 – 1.40 (m, 3H), 1.39 – 1.26 (m, 1H) ppm.  $^{13}\text{C}$  NMR (126 MHz,  $\text{CDCl}_3$ )  $\delta$  178.7, 154.5, 58.2, 47.7, 33.5, 32.7, 29.5, 26.8, 25.2, 25.1, 24.8 ppm. HRMS (ESI):  $m/z$ , calcd. for  $\text{C}_{11}\text{H}_{18}\text{O}_1\text{N}_5$  [ $\text{M} + \text{H}^+$ ]: 236.1506, found 236.1506.

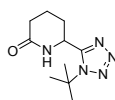

**6-(1-(tert-butyl)-1H-tetrazol-5-yl)piperidin-2-one (6f):** The product was obtained using procedure 2 starting

from **5f** as a white solid (120 mg, 76%):  $^1\text{H}$  NMR (500 MHz,  $\text{CDCl}_3$ )  $\delta$  7.48 (s, 1H), 5.22 – 5.09 (m, 1H), 2.46 – 2.37 (m, 1H), 2.36 – 2.27 (m, 1H), 2.20 – 2.08 (m, 2H), 2.07 – 1.98 (m, 1H), 1.77 (s, 10H) ppm.  $^{13}\text{C}$  NMR (126 MHz,  $\text{CDCl}_3$ )  $\delta$  172.1, 155.4, 61.6, 47.9, 30.9, 30.2, 28.0, 18.6 ppm.  $[\text{M}+\text{H}]^+$ . HRMS (ESI):  $m/z$ , calcd. for  $\text{C}_{10}\text{H}_{18}\text{O}_1\text{N}_5$   $[\text{M} + \text{H}^+]$ : 224.1506, found 224.1507.

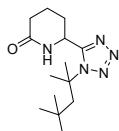

**6-(1-(2,4,4-trimethylpentan-2-yl)-1H-tetrazol-5-yl)piperidin-2-one (6g)**: The product was obtained using procedure 2 starting from **5g** as a white solid (50 mg, 42%):  $^1\text{H}$  NMR (500 MHz,  $\text{CDCl}_3$ )  $\delta$  6.58 (d,  $J = 25.2$ , 1H), 5.15 (t,  $J = 6.1$ , 1H), 2.59 – 2.39 (m, 2H), 2.28 – 2.10 (m, 3H), 1.94 (q,  $J = 15.3$ , 2H), 1.86 (d,  $J = 12.9$ , 7H), 1.83 – 1.71 (m, 1H), 0.79 (s, 9H) ppm.  $^{13}\text{C}$  NMR (126 MHz,  $\text{CDCl}_3$ )  $\delta$  171.8, 155.6, 65.2, 54.5, 48.6, 31.9, 31.1, 30.8, 30.7, 30.7, 28.4, 19.0 ppm. HRMS (ESI):  $m/z$ , calcd. for  $\text{C}_{14}\text{H}_{26}\text{O}_1\text{N}_5$   $[\text{M} + \text{H}^+]$ : 280.2132, found 280.2131.

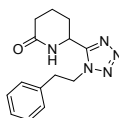

**6-(1-phenethyl-1H-tetrazol-5-yl)piperidin-2-one (6h)**: The product was obtained using procedure 2 starting from **5h** as a white solid (43 mg, 40%):  $^1\text{H}$  NMR (500 MHz,  $\text{CDCl}_3$ )  $\delta$  7.27 (d,  $J = 6.7$ , 3H), 7.06 – 6.91 (m, 3H), 4.65 – 4.46 (m, 2H), 4.28 (t,  $J = 5.8$ , 1H), 3.31 – 3.16 (m, 2H), 2.28 – 2.19 (m, 2H), 1.94 – 1.81 (m, 1H), 1.67 – 1.44 (m, 3H) ppm.  $^{13}\text{C}$  NMR (126 MHz,  $\text{CDCl}_3$ )  $\delta$  172.1, 155.4, 136.6, 129.2, 128.9, 127.7, 49.4, 46.7, 36.3, 31.0, 26.9, 18.8 ppm. HRMS (ESI):  $m/z$ , calcd. for  $\text{C}_{14}\text{H}_{18}\text{O}_1\text{N}_5$   $[\text{M} + \text{H}^+]$ : 272.1506, found 272.1506.

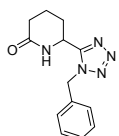

**6-(1-benzyl-1H-tetrazol-5-yl)piperidin-2-one (6i)**: The product was obtained using procedure 2 starting from **5i** as a white solid (78 mg, 99%):  $^1\text{H}$  NMR (500 MHz,  $\text{CDCl}_3$ )  $\delta$  7.44 – 7.33 (m, 3H), 7.24 (s, 1H), 7.23 – 7.17 (m, 2H), 5.66 (s, 2H), 4.91 – 4.81 (m, 1H), 2.37 – 2.21 (m, 2H), 1.98 – 1.82 (m, 2H), 1.77 – 1.59 (m, 2H).  $^{13}\text{C}$  NMR (125 MHz,  $\text{CDCl}_3$ )  $\delta$  172.5, 155.1, 133.6, 129.5, 129.2, 127.7, 51.6, 47.4, 31.1, 25.0, 18.8 ppm. HRMS (ESI):  $m/z$ , calcd. for  $\text{C}_{13}\text{H}_{16}\text{O}_1\text{N}_5$   $[\text{M} + \text{H}^+]$ : 258.1349, found 258.1349.

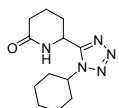

**6-(1-cyclohexyl-1H-tetrazol-5-yl)piperidin-2-one (6j)**: The product was obtained using procedure 2 starting from **5j** as a white solid (75 mg, 79%):  $^1\text{H}$  NMR (500 MHz,  $\text{CDCl}_3$ )  $\delta$  7.50 (s, 1H), 4.95 (t,  $J = 5.6$ , 1H), 4.38 – 4.19 (m, 1H), 2.48 – 2.32 (m, 2H), 2.23 – 1.91 (m, 10H), 1.91 – 1.82 (m, 1H), 1.82 – 1.70 (m, 1H), 1.51 – 1.39 (m, 2H), 1.39 – 1.31 (m, 1H) ppm.  $^{13}\text{C}$  NMR (126 MHz,  $\text{CDCl}_3$ )  $\delta$  172.4, 154.1, 58.3, 46.9, 33.6, 32.9, 31.1, 27.5, 25.3, 25.3, 24.8, 18.9 ppm. HRMS (ESI):  $m/z$ , calcd. for  $\text{C}_{12}\text{H}_{20}\text{O}_1\text{N}_5$   $[\text{M} + \text{H}^+]$ : 250.1662, found 250.1662.



# <sup>1</sup>H NMR and <sup>13</sup>C NMR spectra of compounds 5a-j and 6a-j

## Compound 5a <sup>1</sup>H NMR

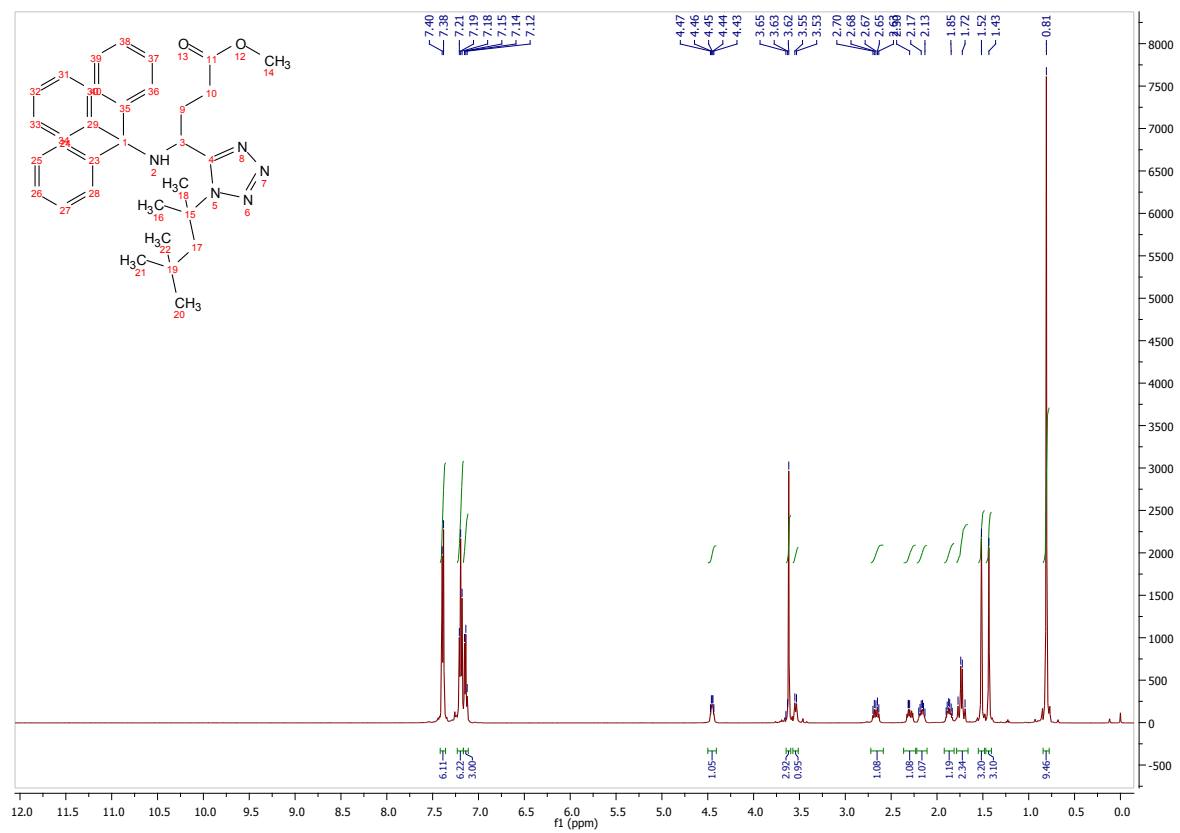

# Compound 5a <sup>13</sup>C NMR

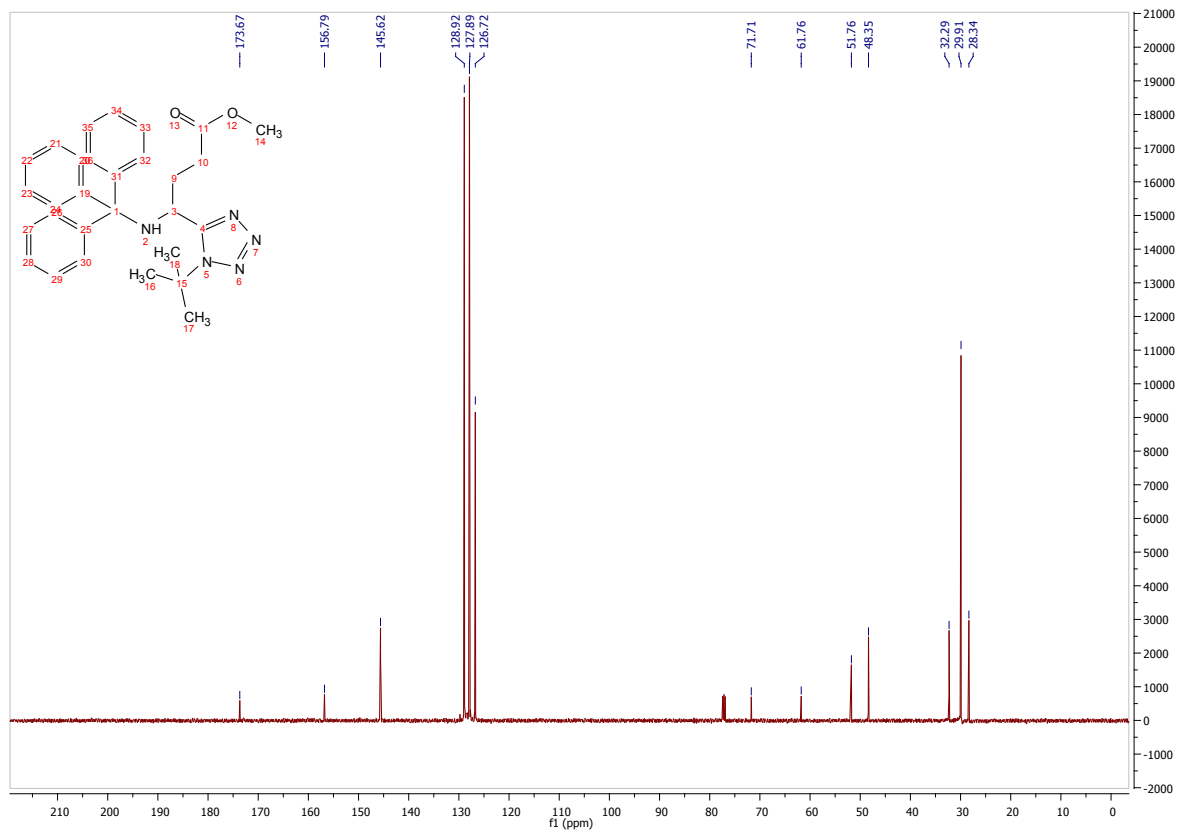

Compound **5b**  $^1\text{H}$  NMR

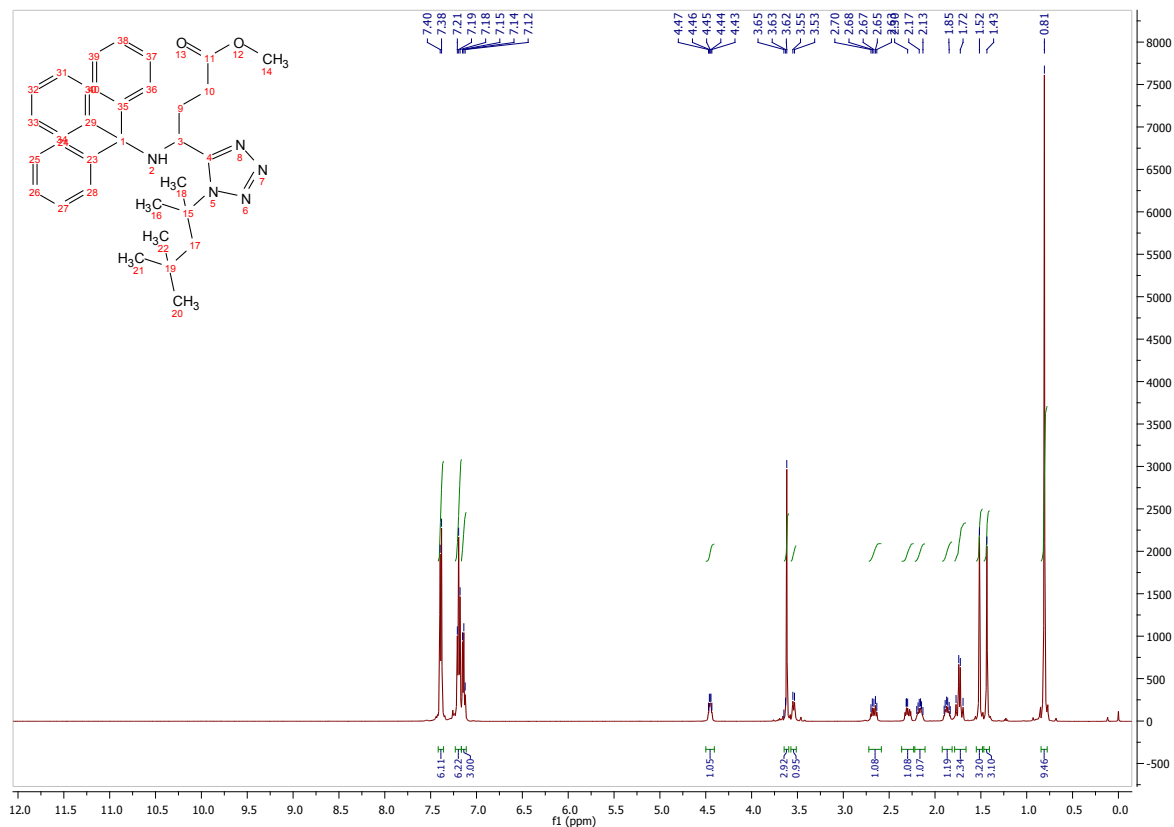

Compound **5b**  $^{13}\text{C}$  NMR

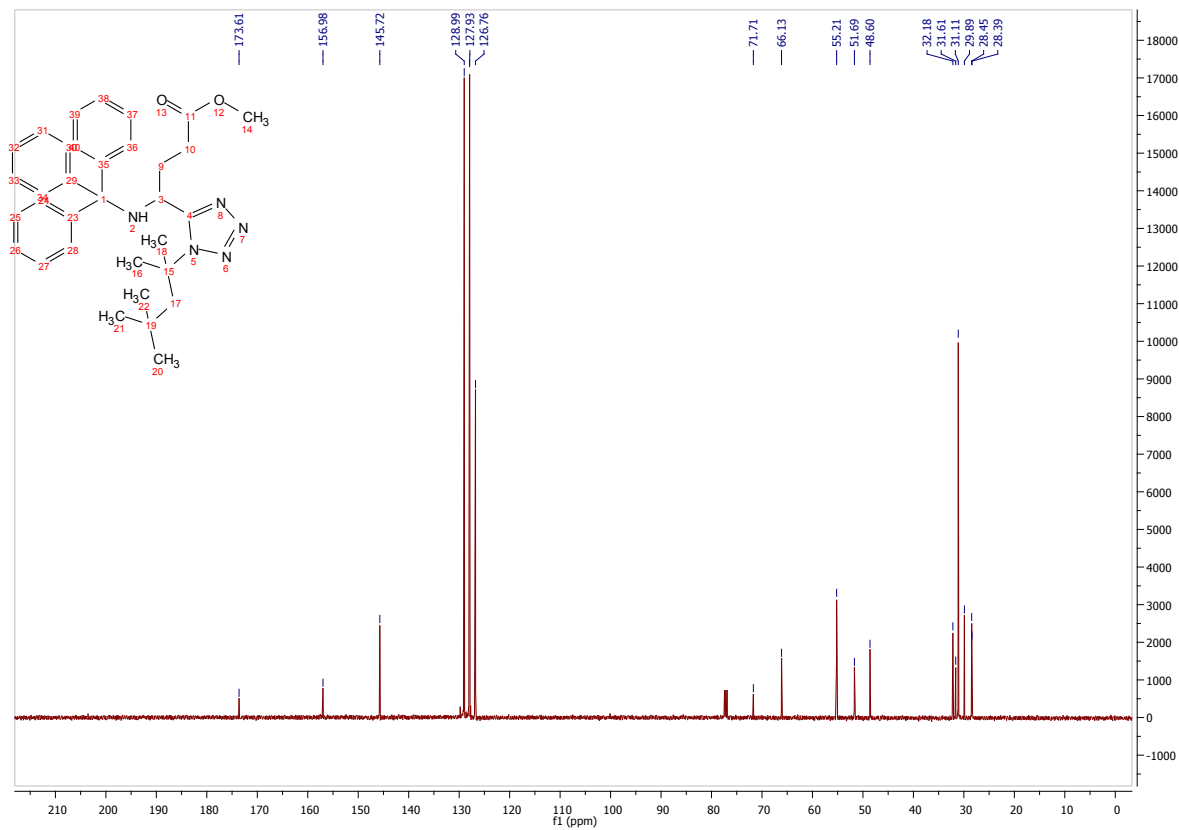

Compound 5c <sup>1</sup>H NMR

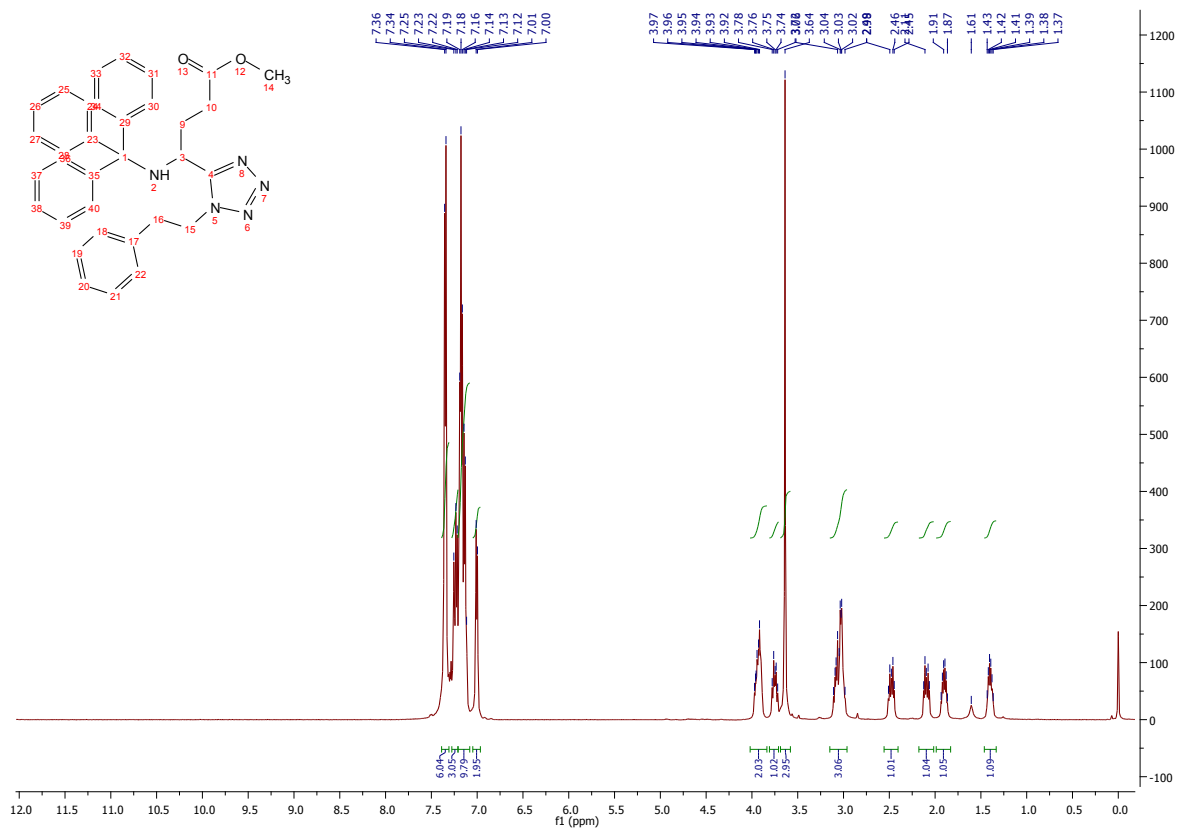

Compound 5c <sup>13</sup>C NMR

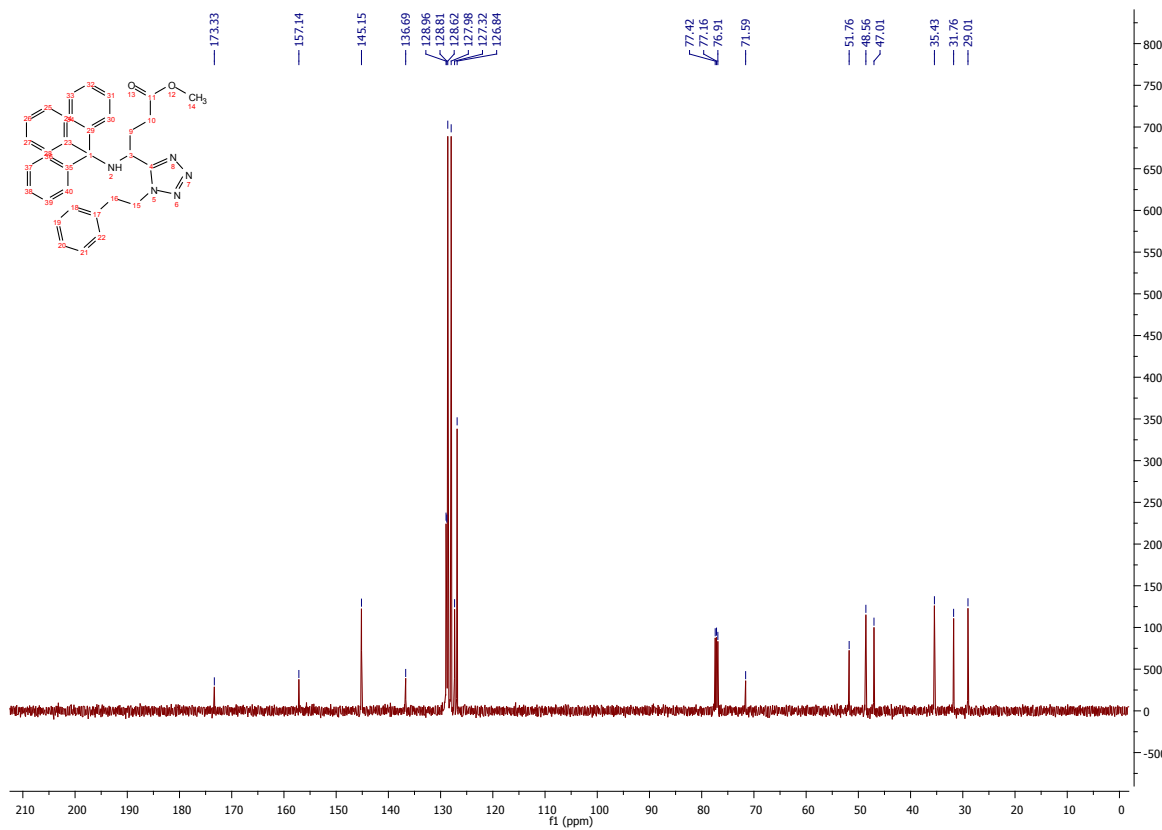

Compound **5d**  $^1\text{H}$  NMR

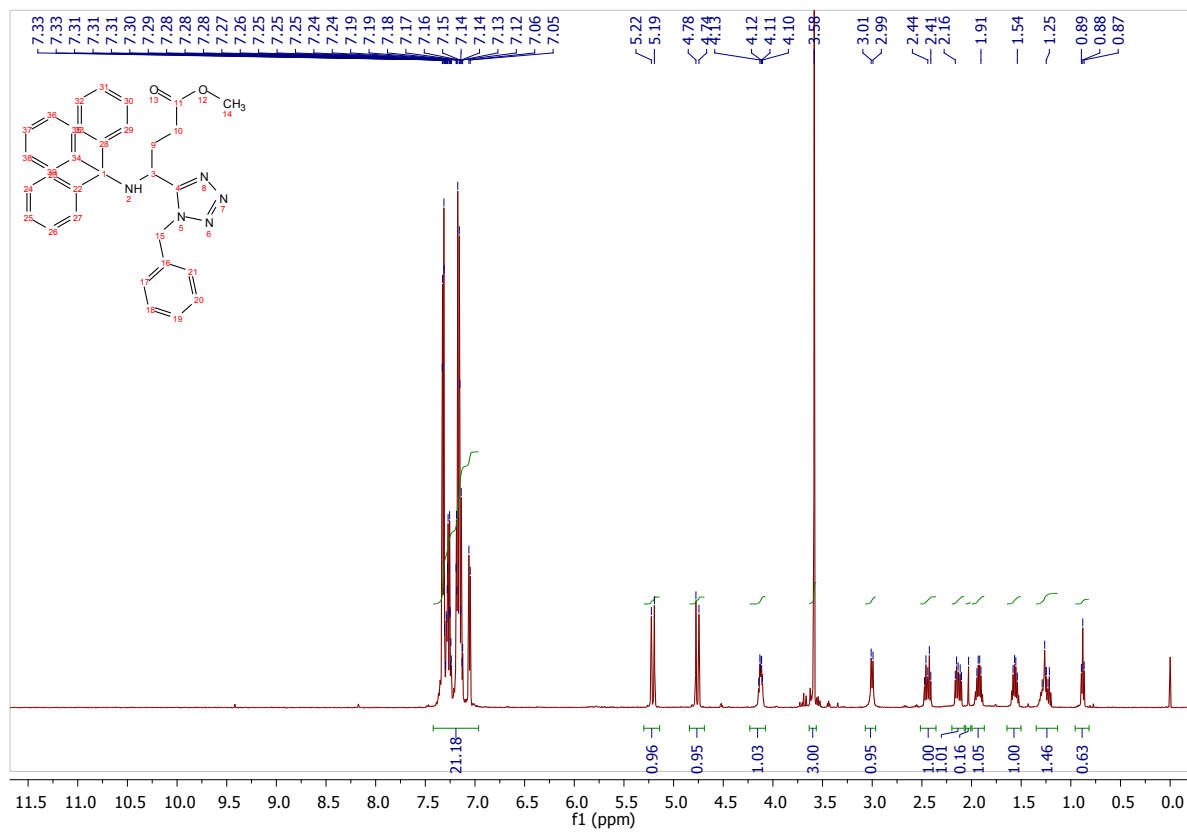

Compound **5d**  $^{13}\text{C}$  NMR

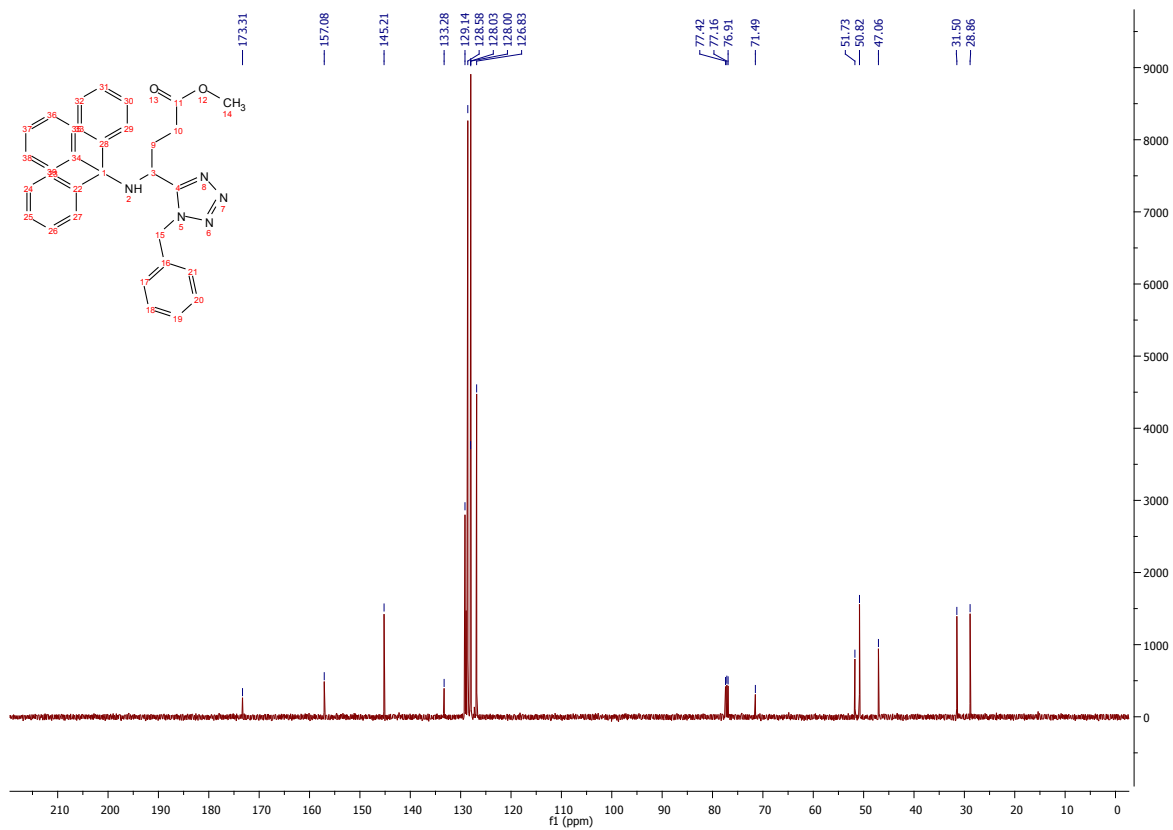

Compound 5e <sup>1</sup>H NMR

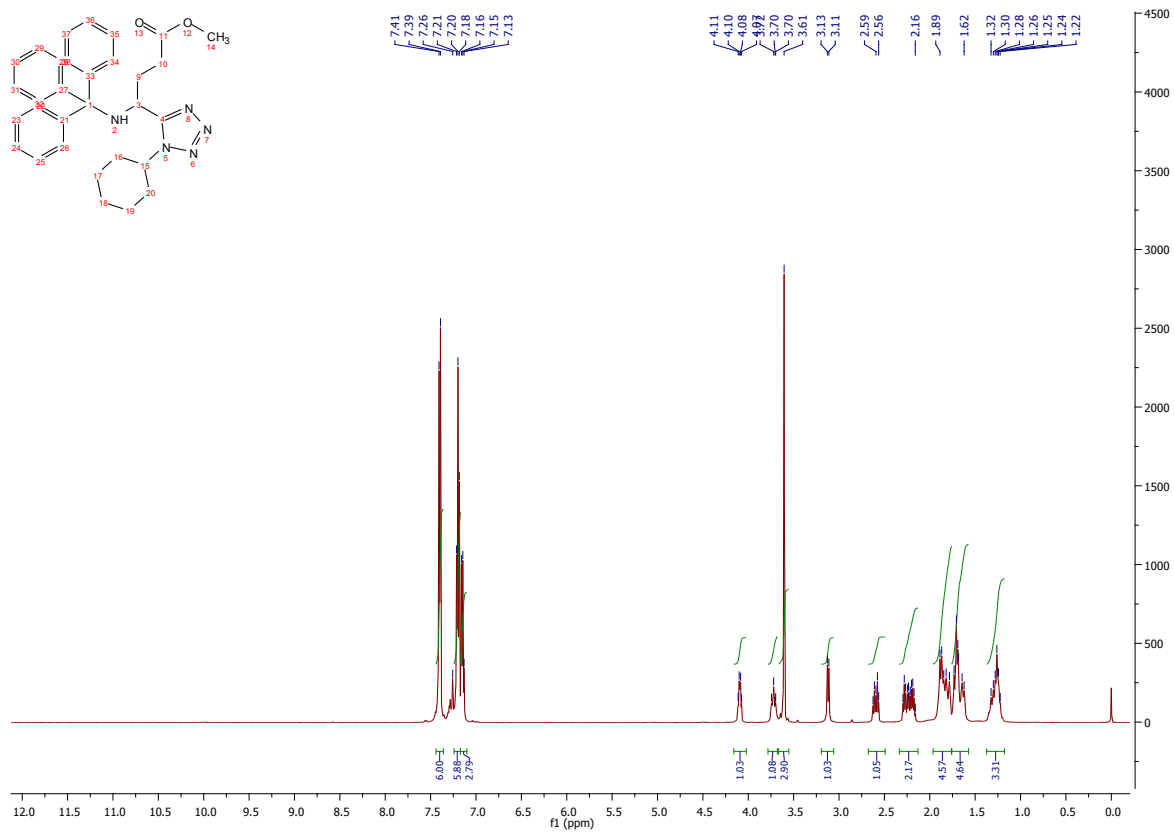

Compound 5e <sup>13</sup>C NMR

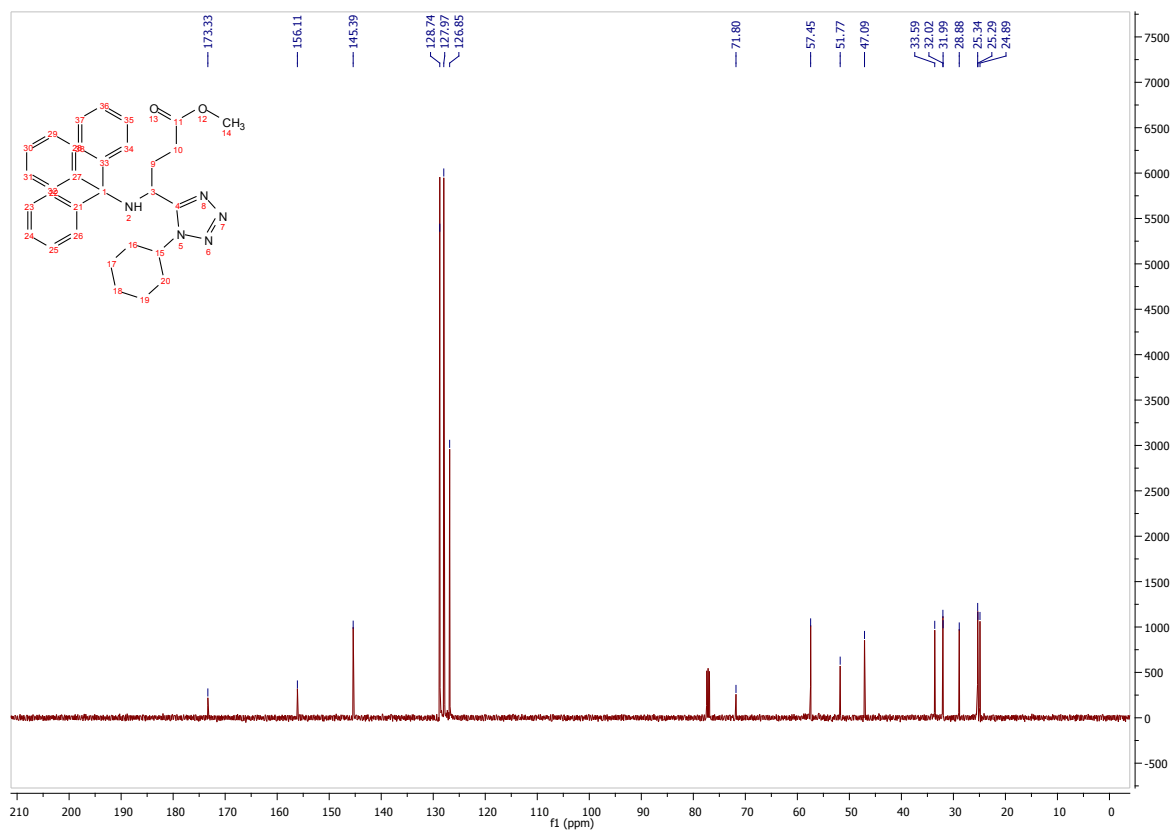

Compound **5f**  $^1\text{H}$  NMR

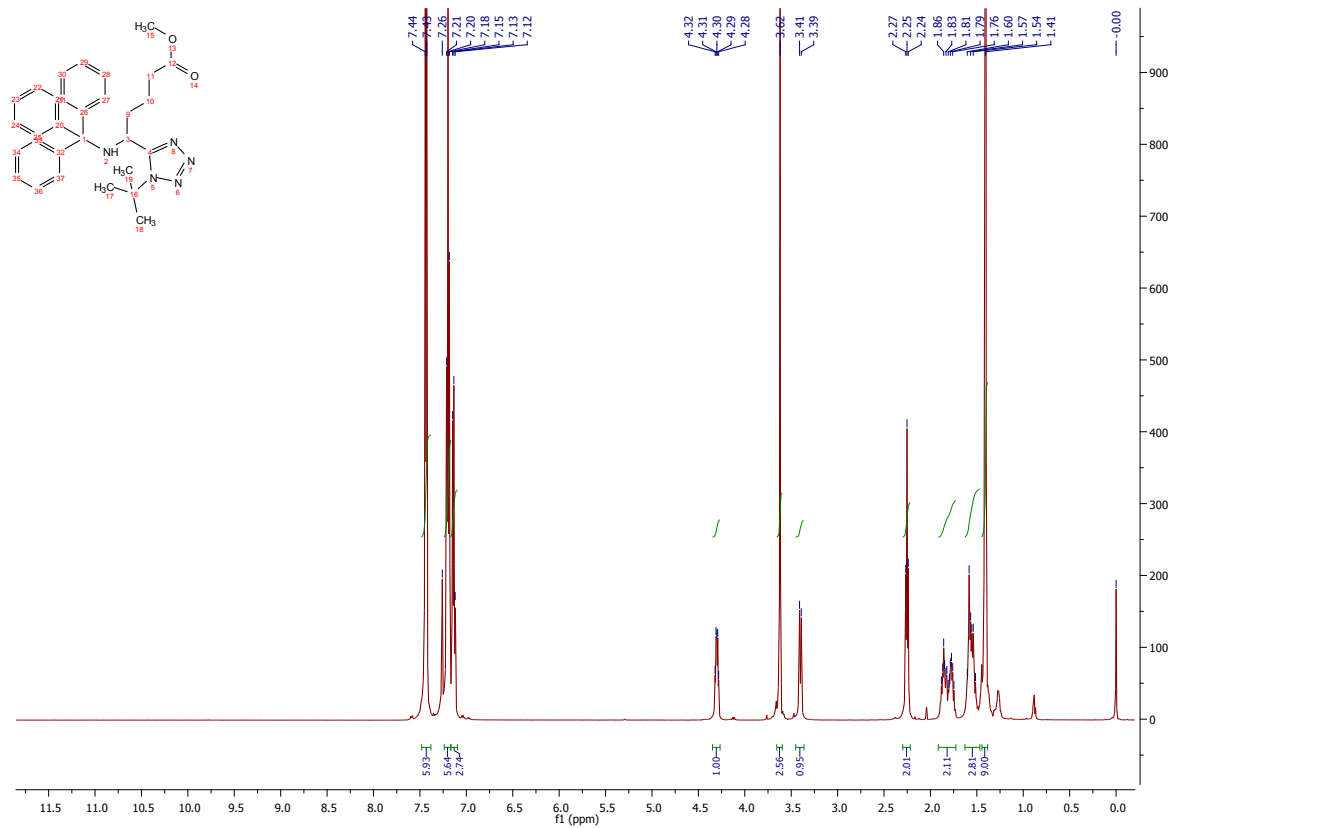

Compound **5f**  $^{13}\text{C}$  NMR

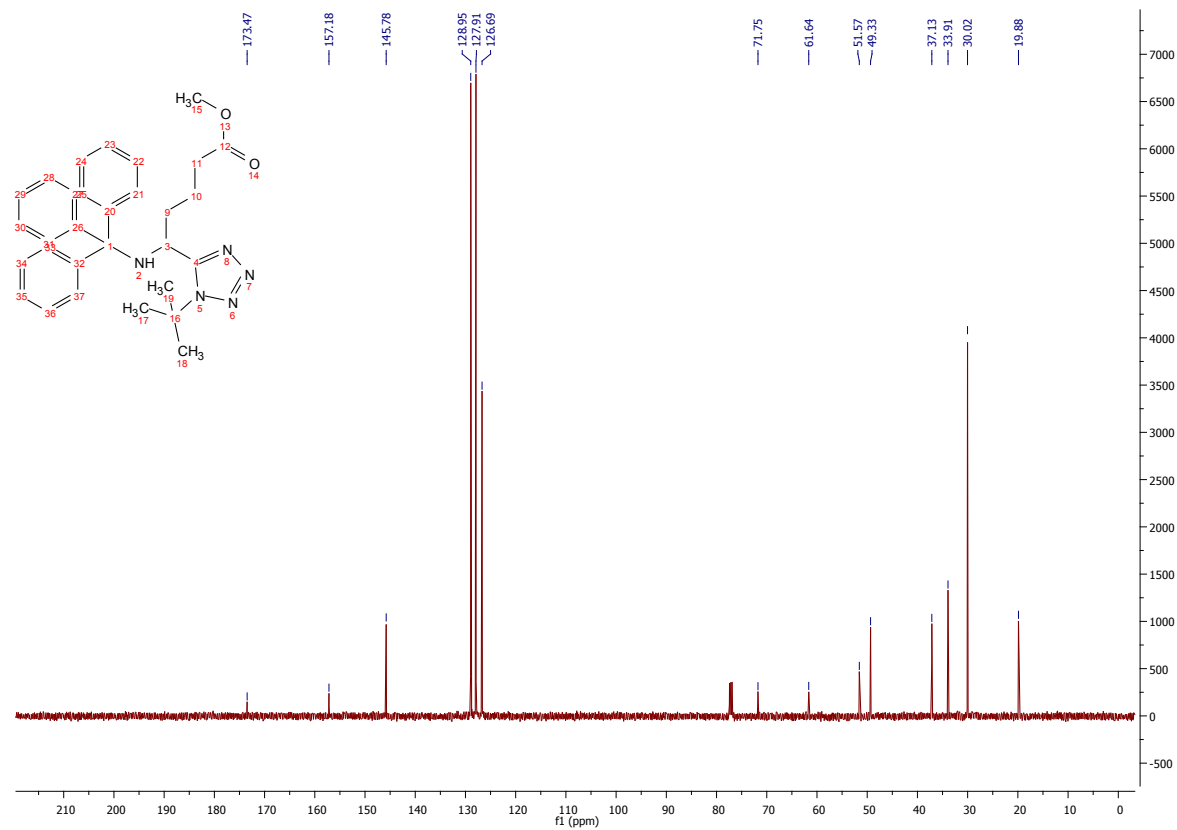

Compound **5g** <sup>1</sup>H NMR

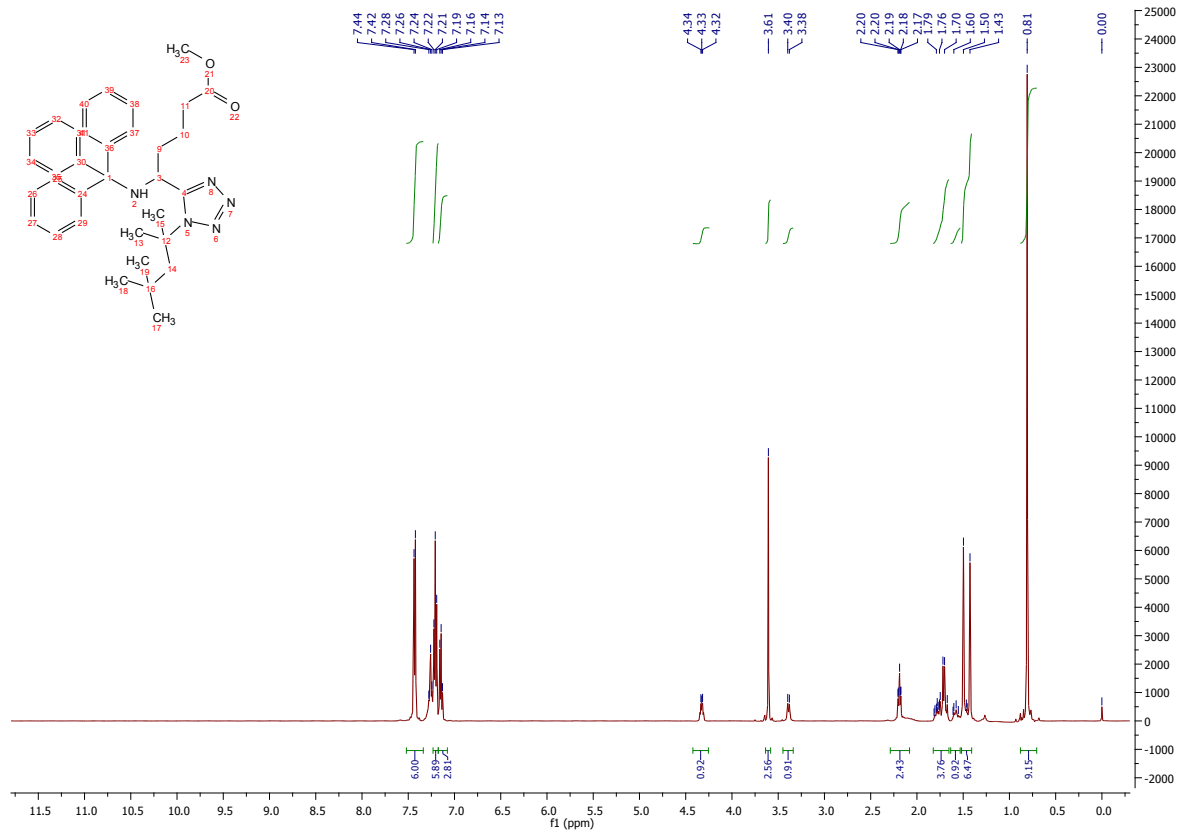

Compound **5g** <sup>13</sup>C NMR

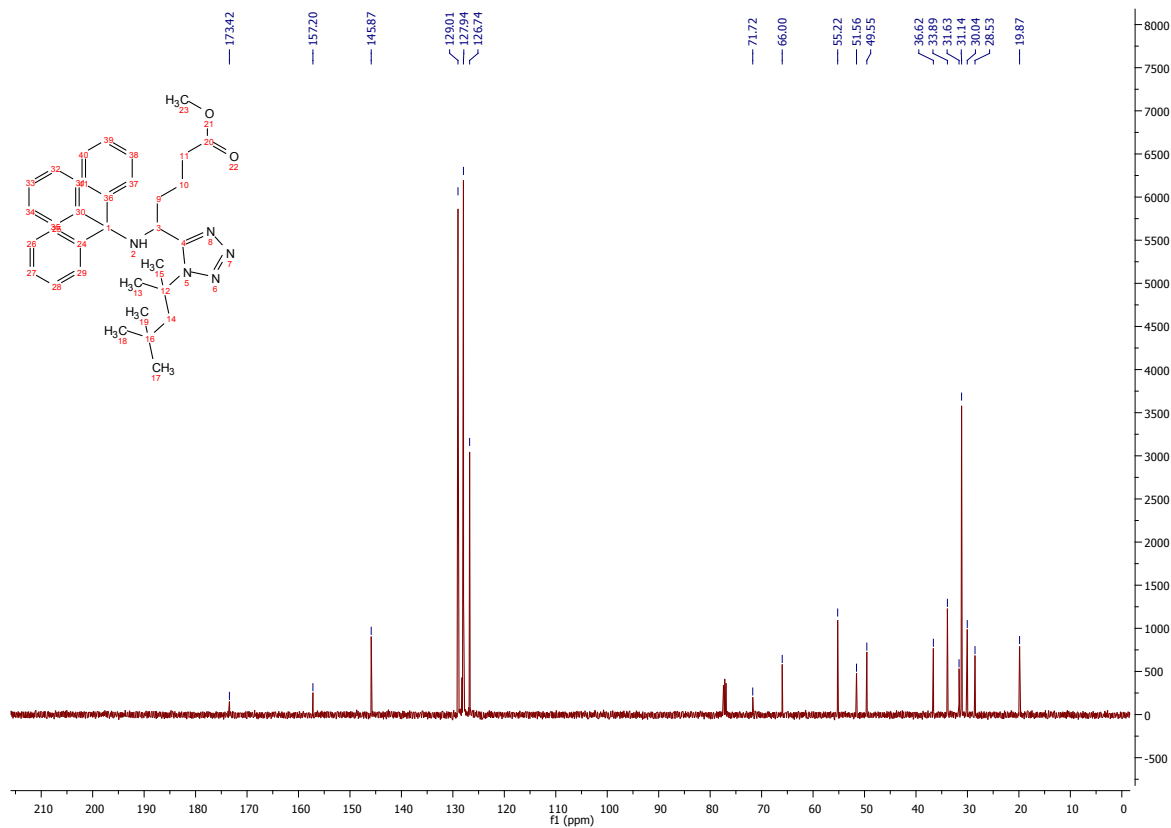



Compound **5h** <sup>1</sup>H NMR

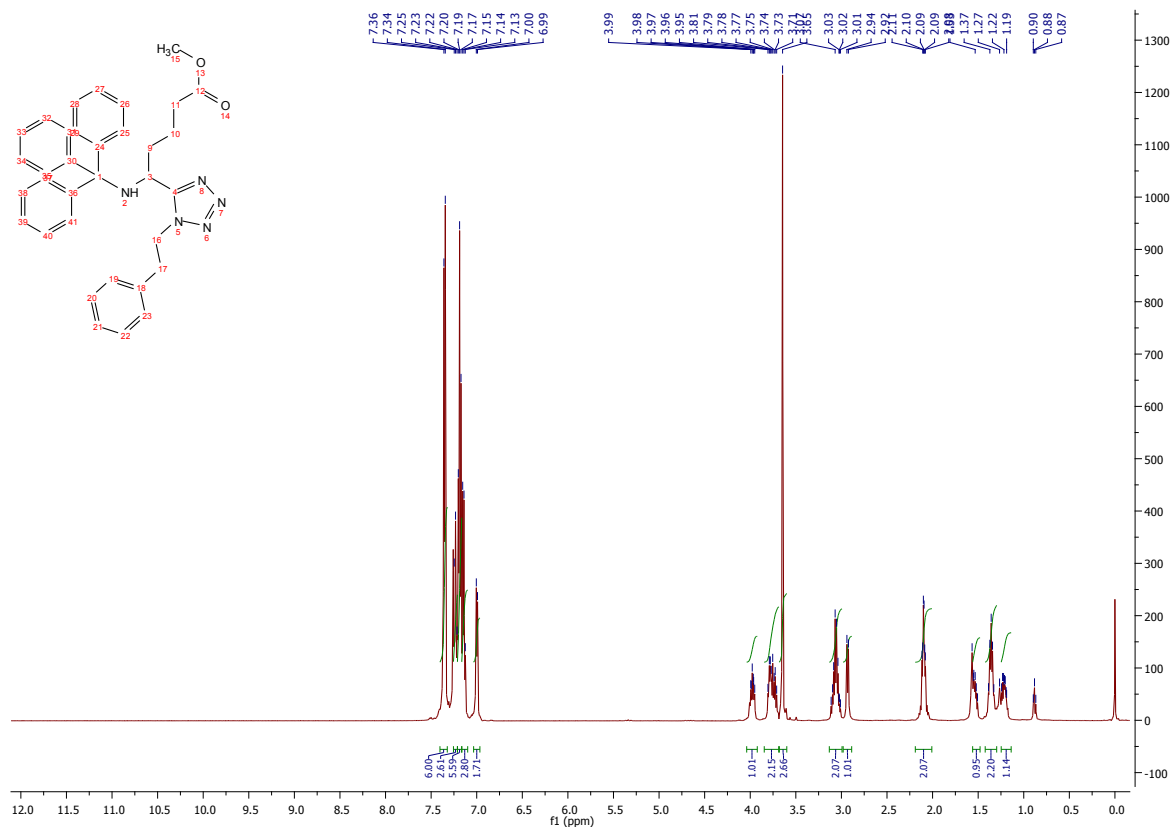

Compound **5h** <sup>13</sup>C NMR

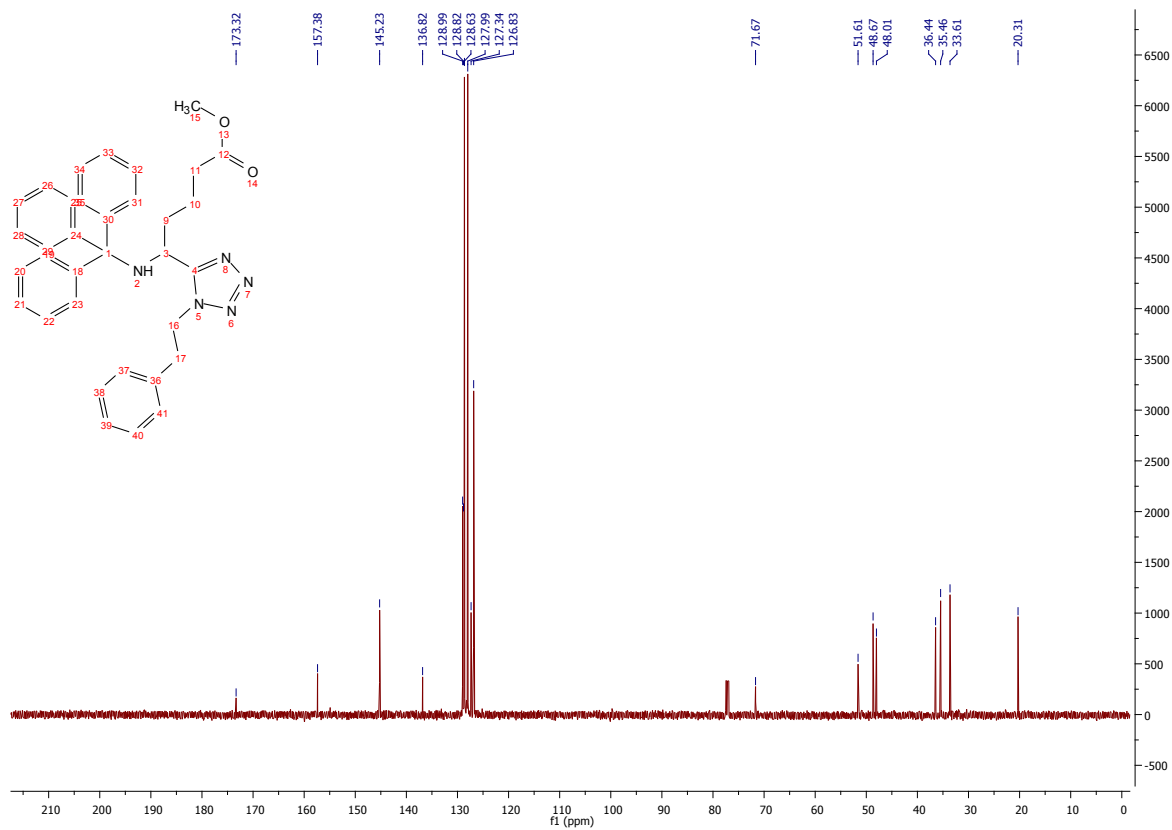

Compound **5i** <sup>1</sup>H NMR

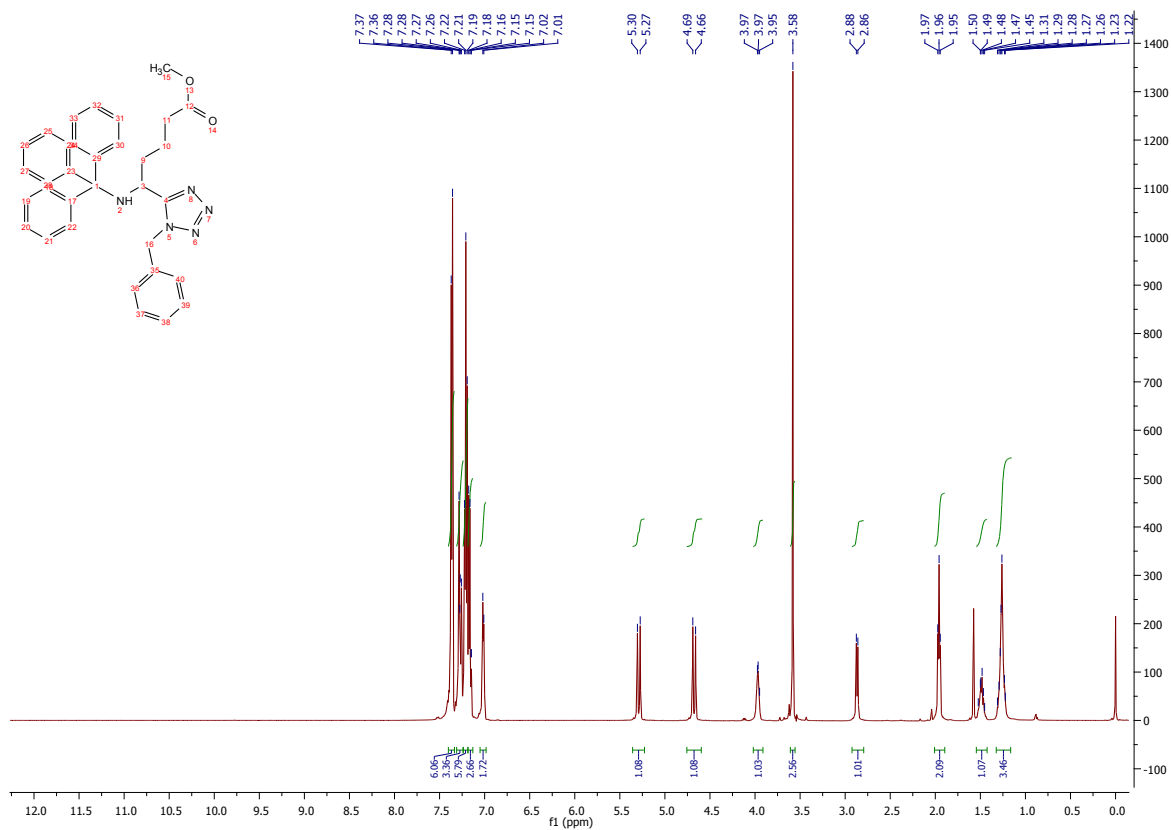

Compound 5i  $^{13}\text{C}$  NMR

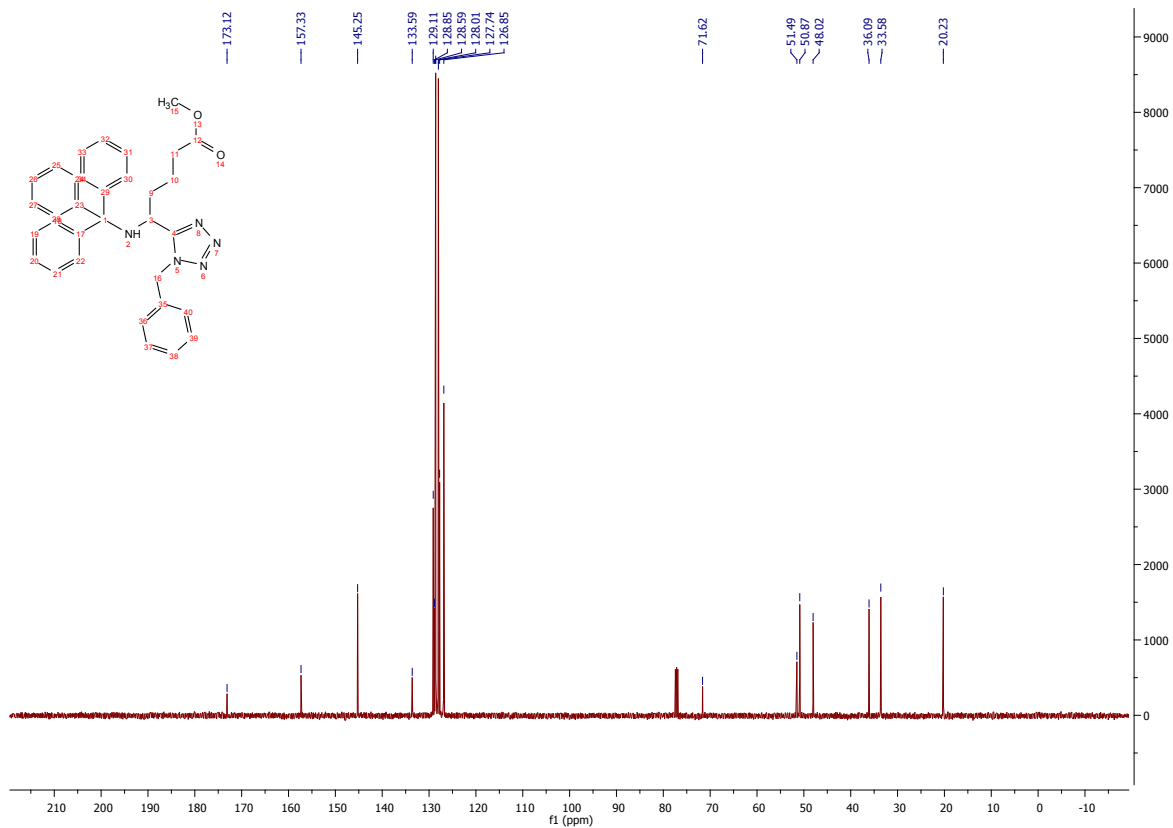

Compound 5j  $^1\text{H}$  NMR

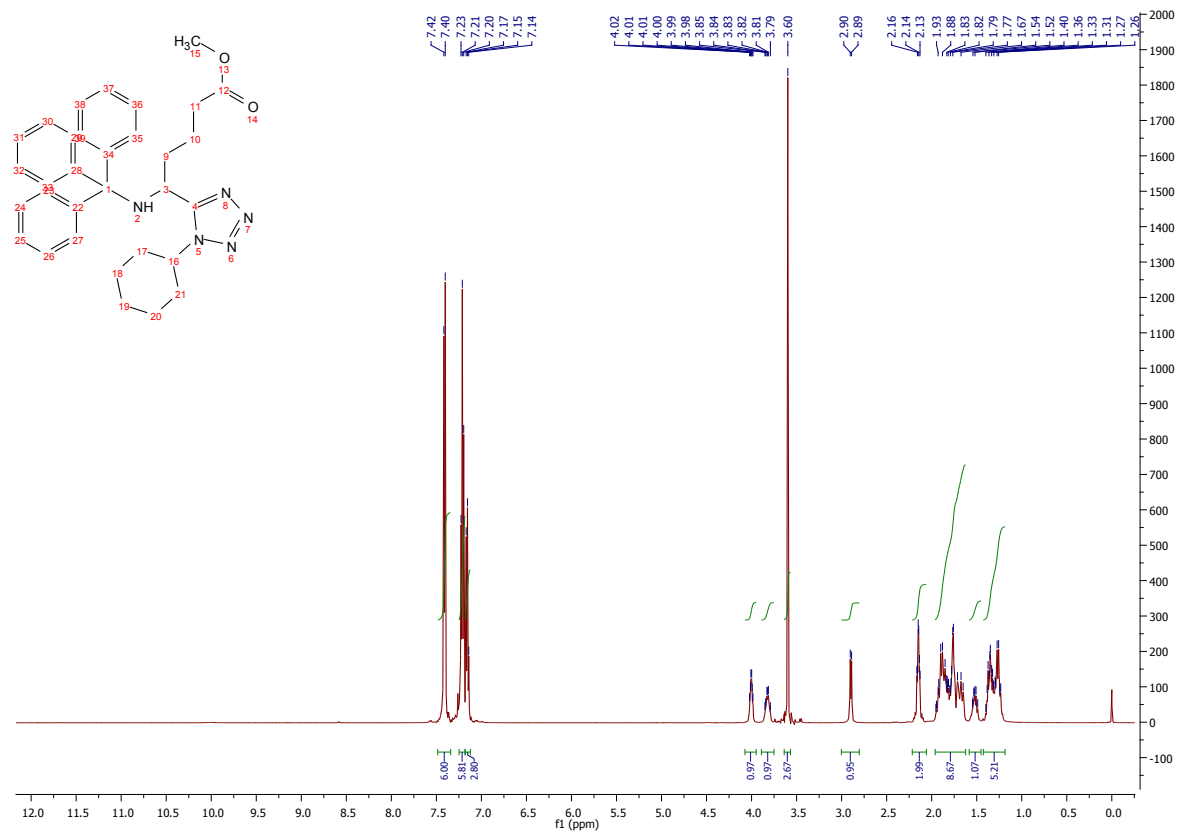

**Compound 5j <sup>13</sup>C NMR**

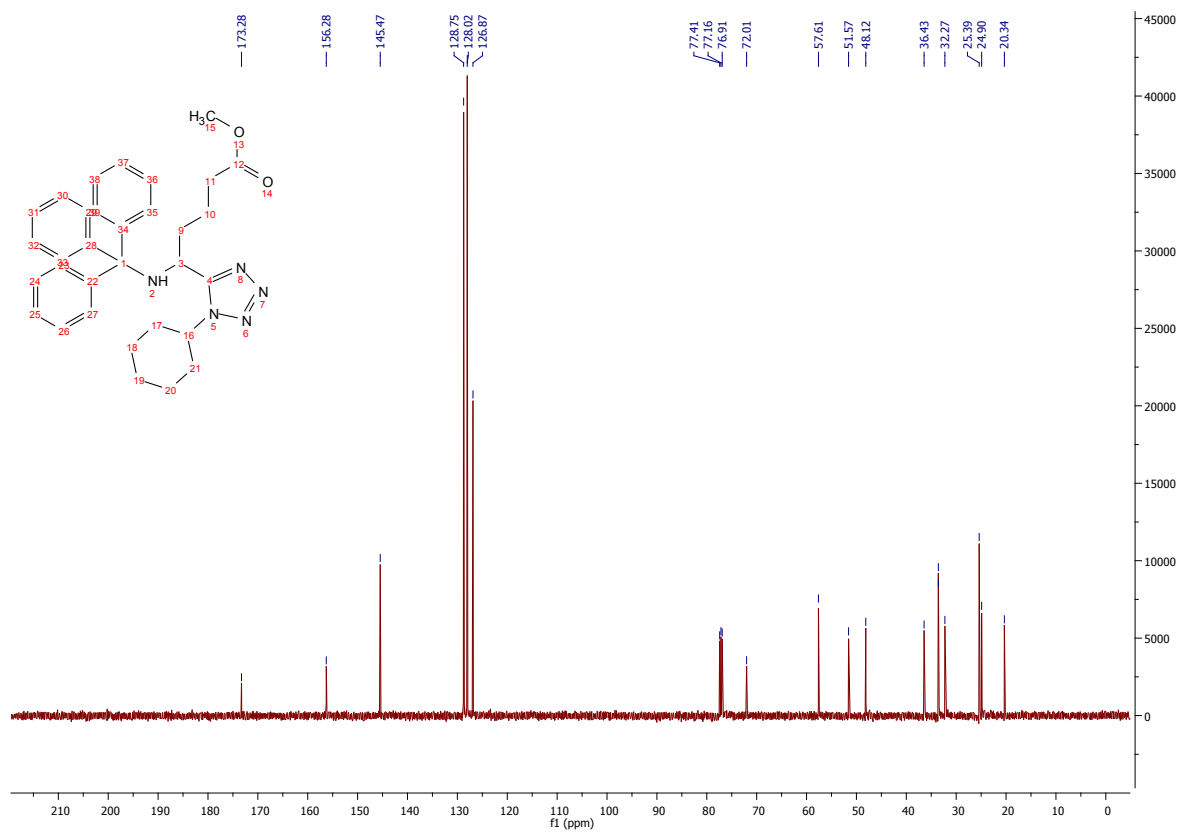

**Compound 6a <sup>1</sup>H NMR**

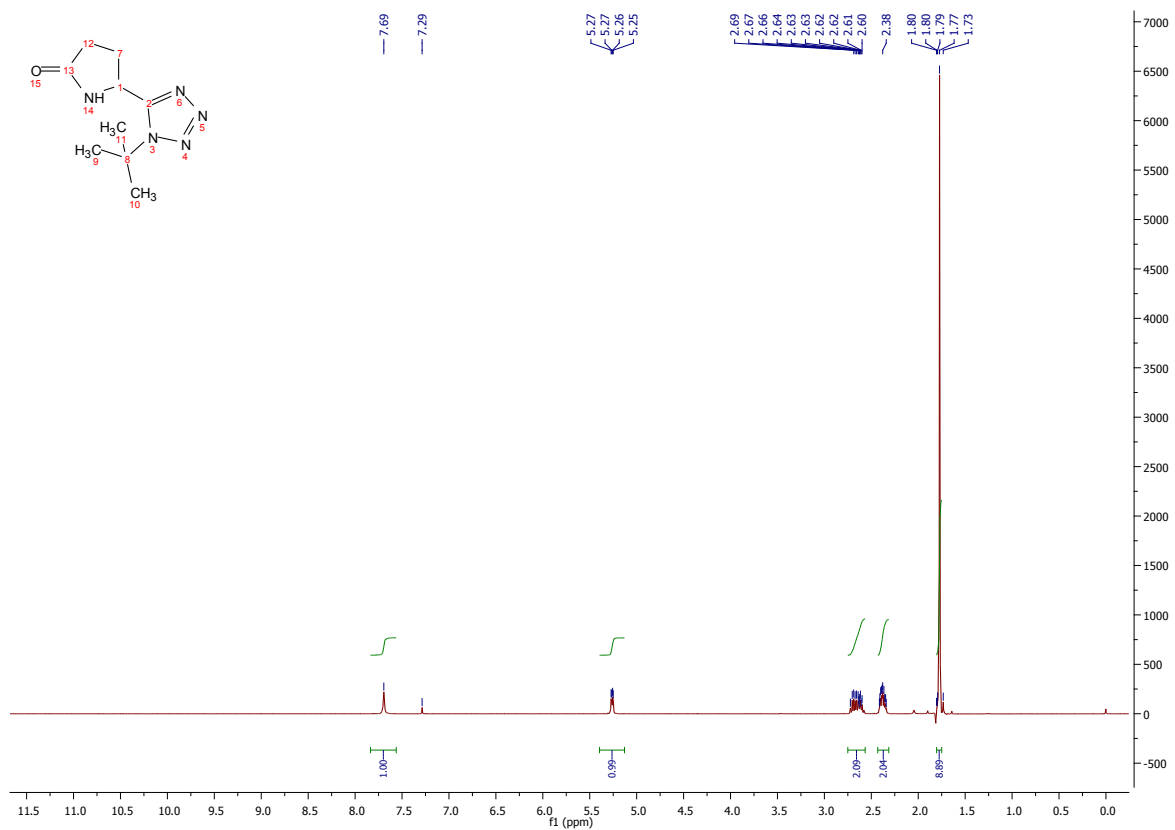

Compound 6a <sup>13</sup>C NMR

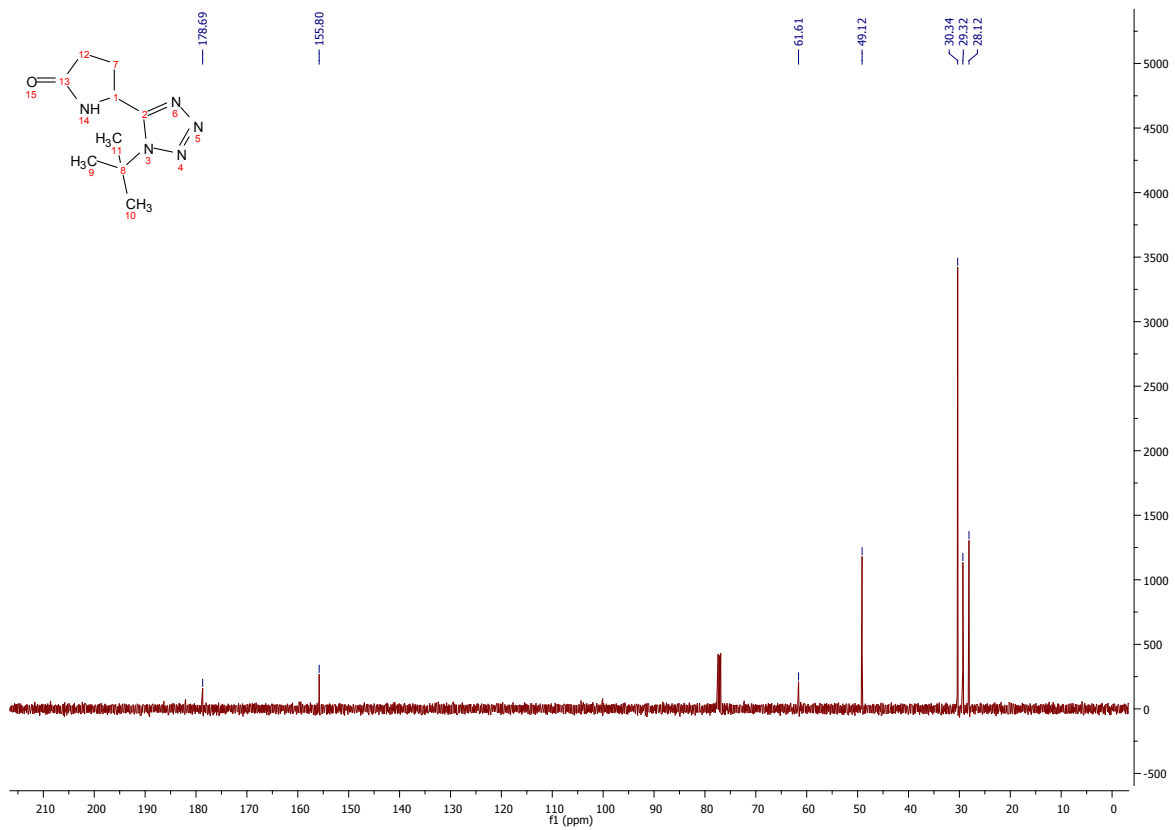

Compound **6b**  $^1\text{H}$  NMR

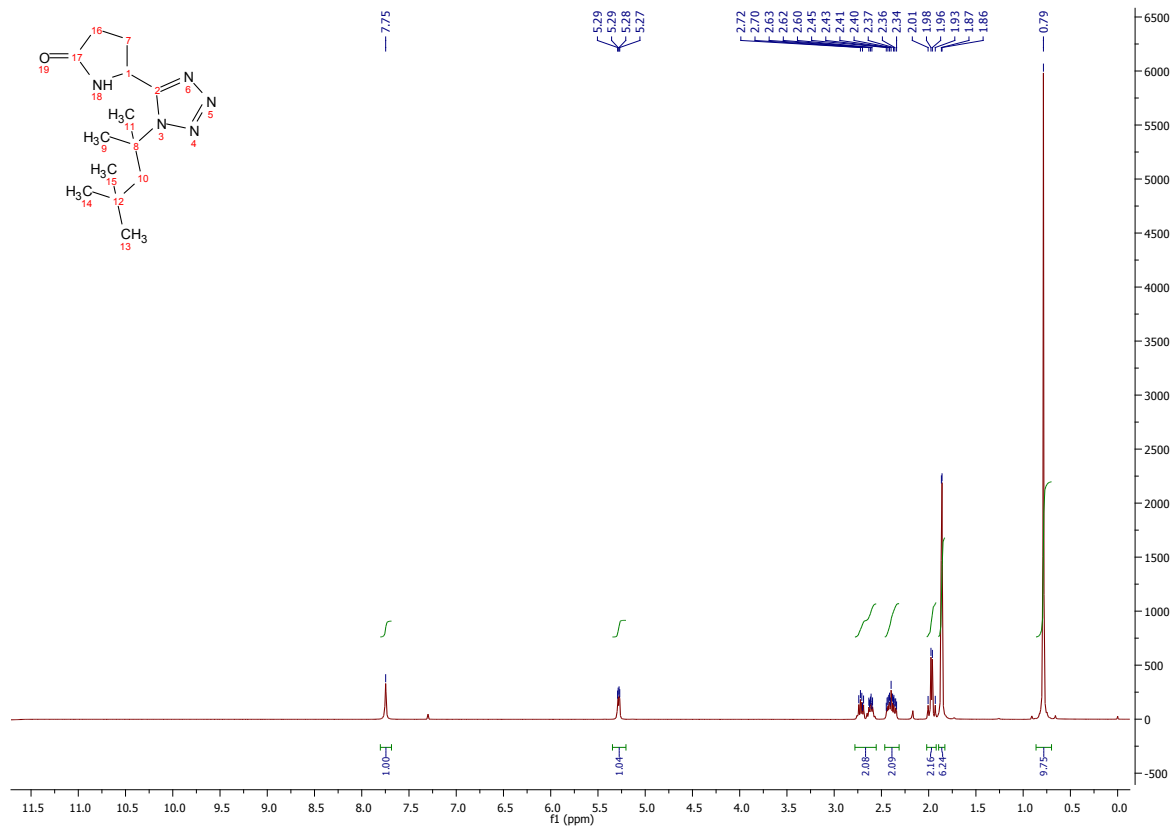

Compound **6b**  $^{13}\text{C}$  NMR

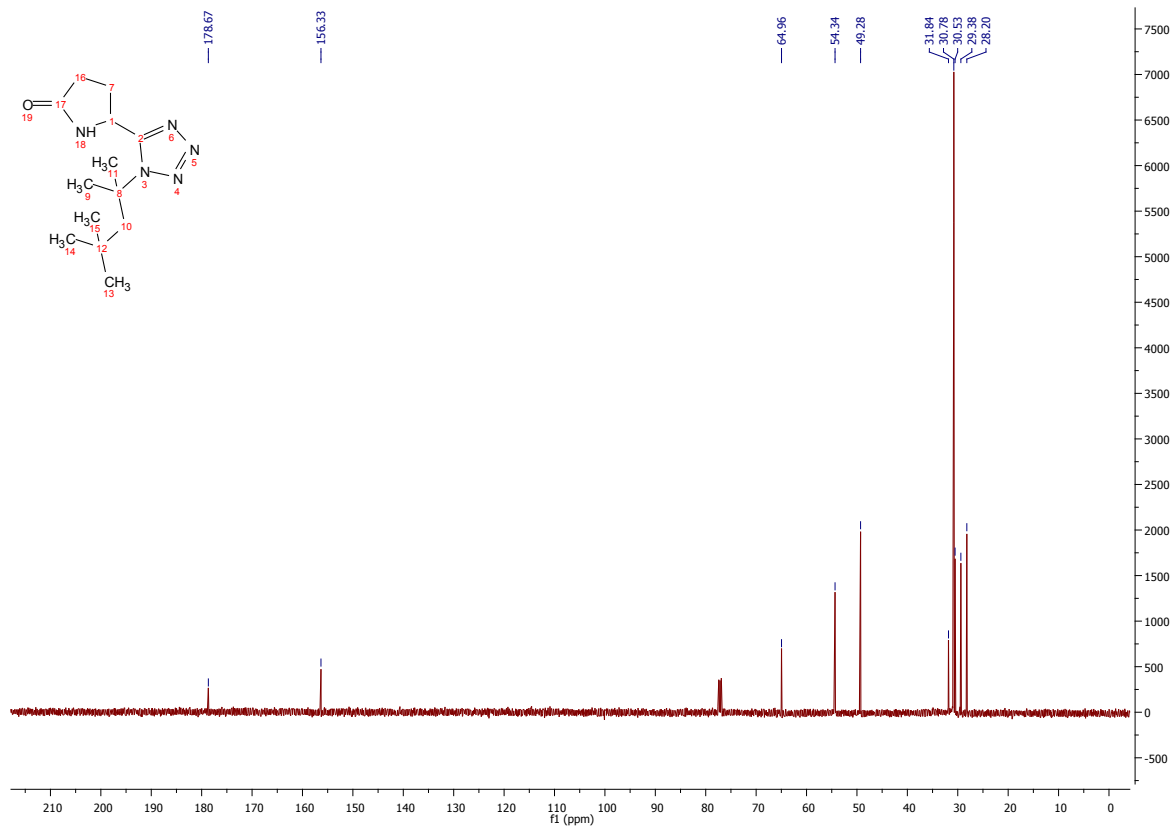

Compound 6c <sup>1</sup>H NMR

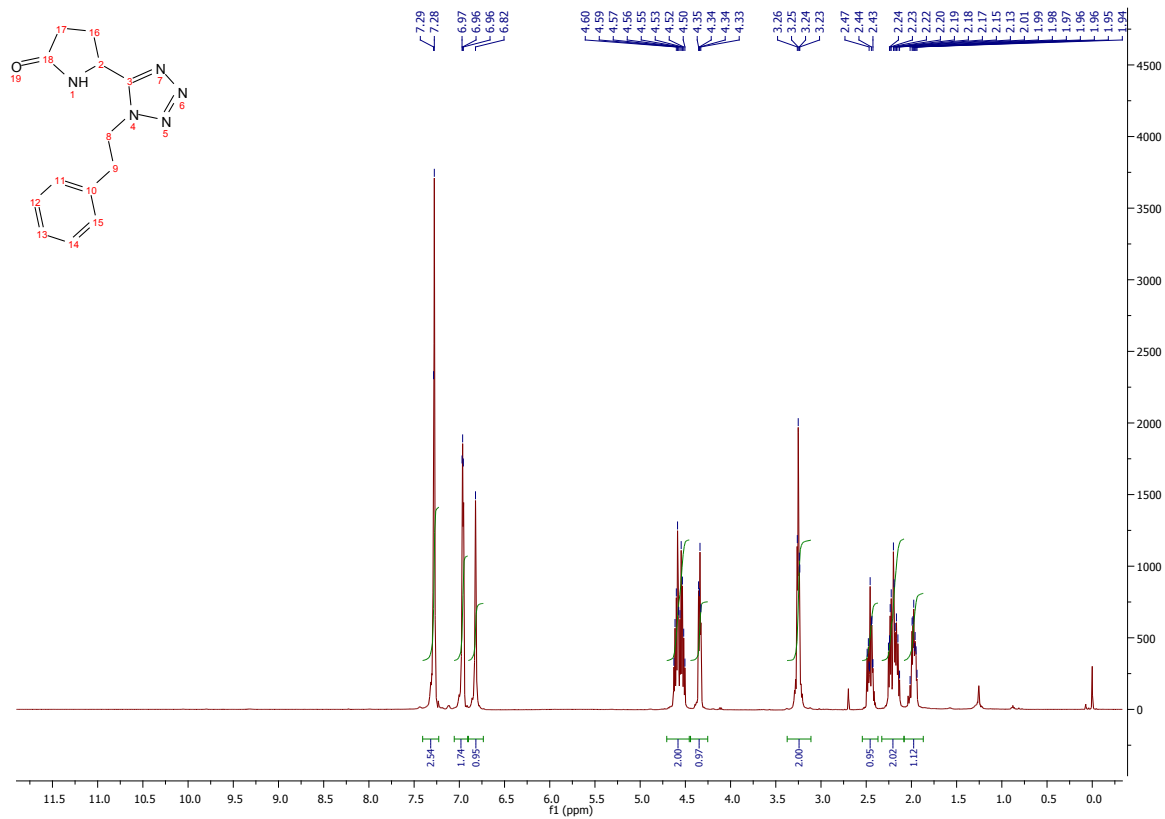

Compound 6c <sup>13</sup>C NMR

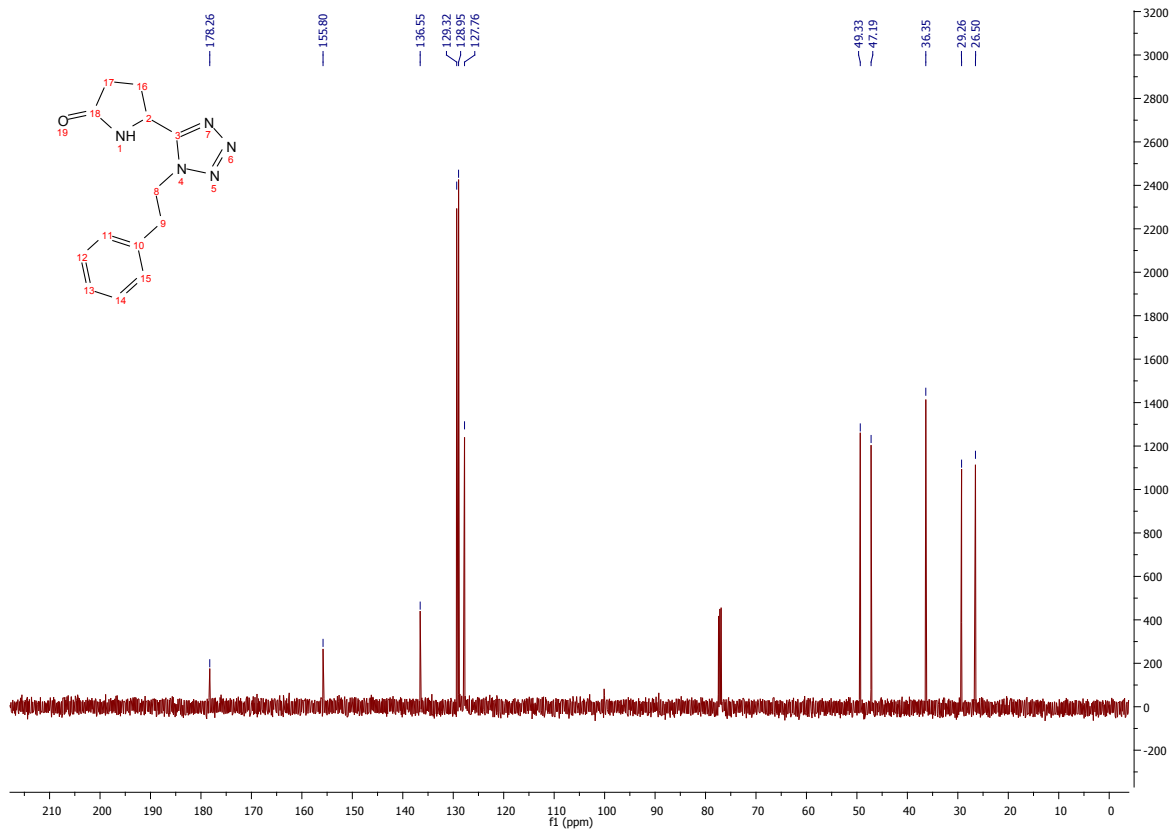

Compound **6d** <sup>1</sup>H NMR

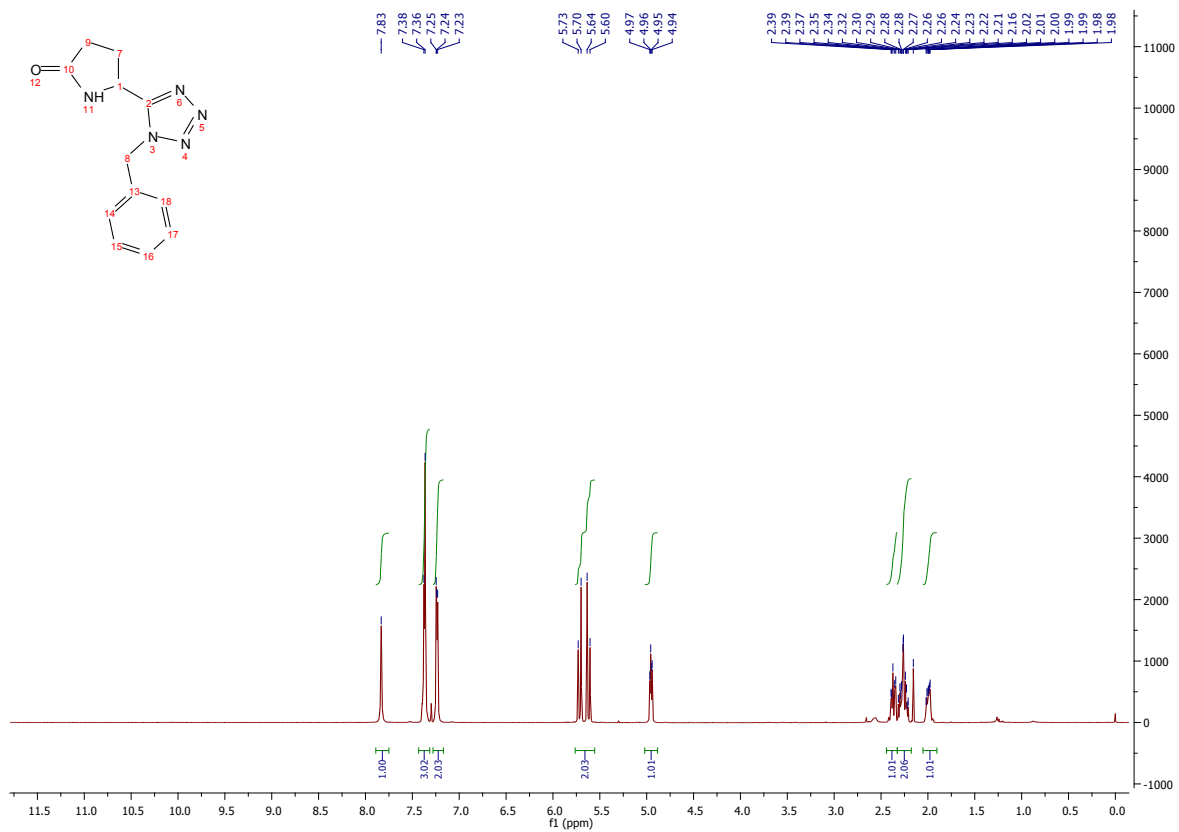

Compound **6d** <sup>13</sup>C NMR

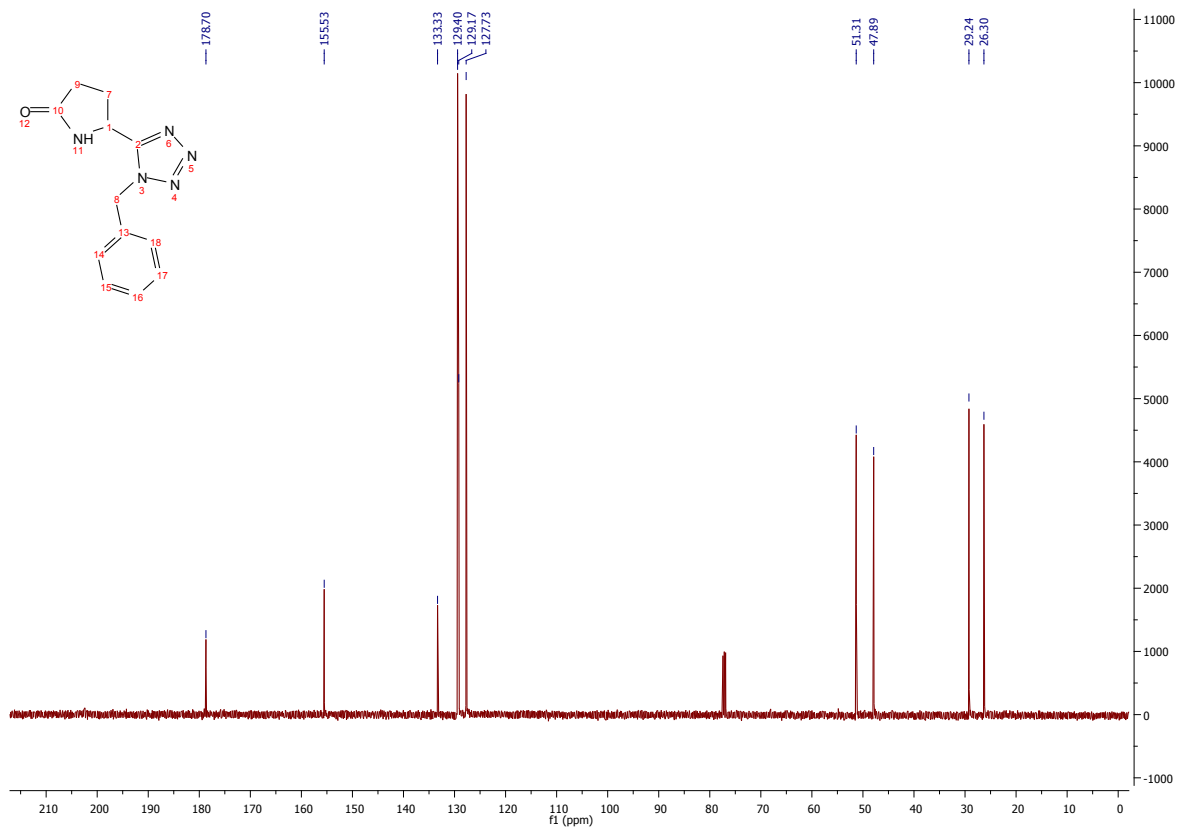

### Compound 6e <sup>1</sup>H NMR

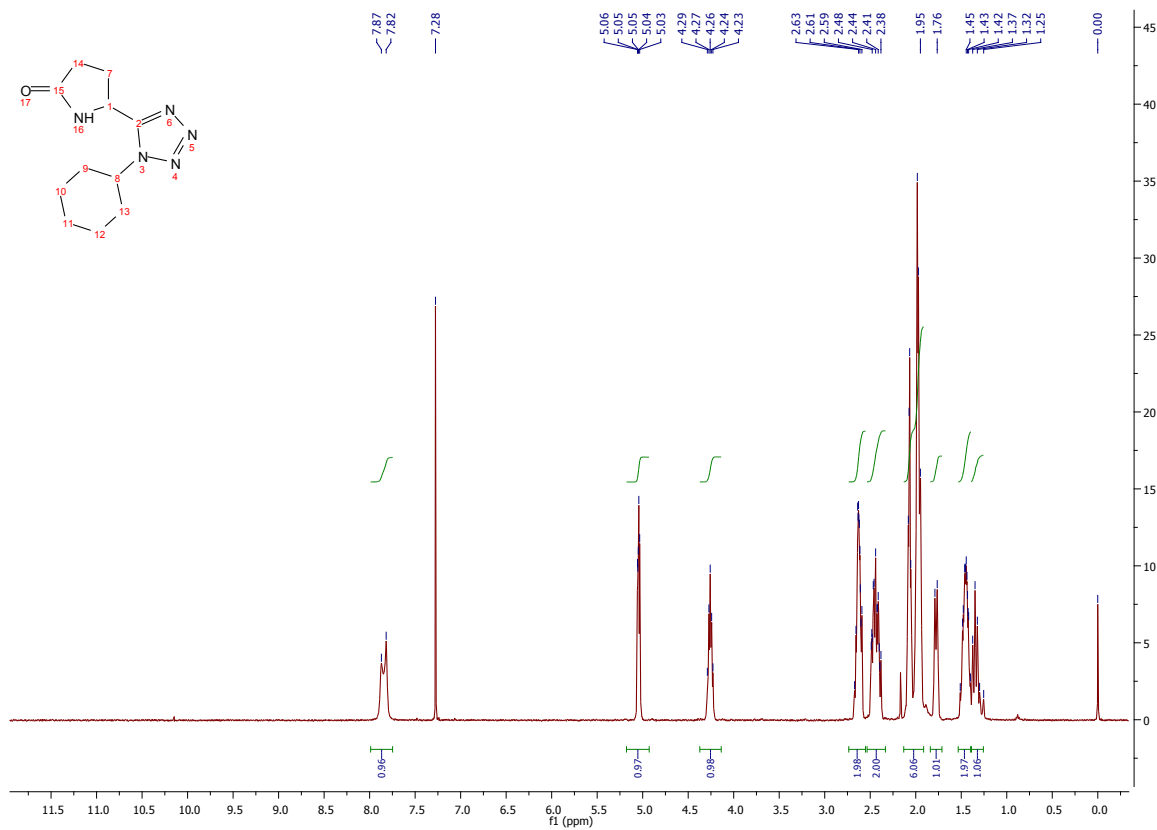

### Compound 6e <sup>13</sup>C NMR

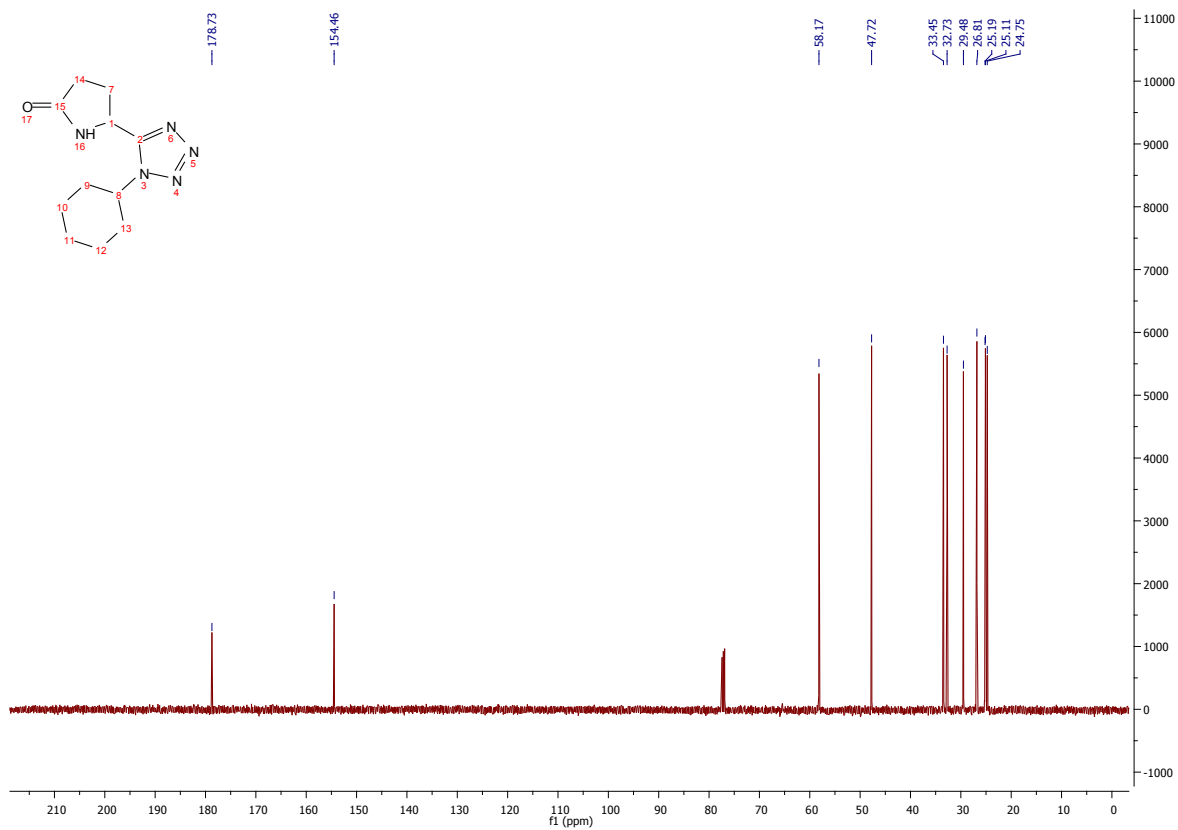



Compound **6f** <sup>1</sup>H NMR

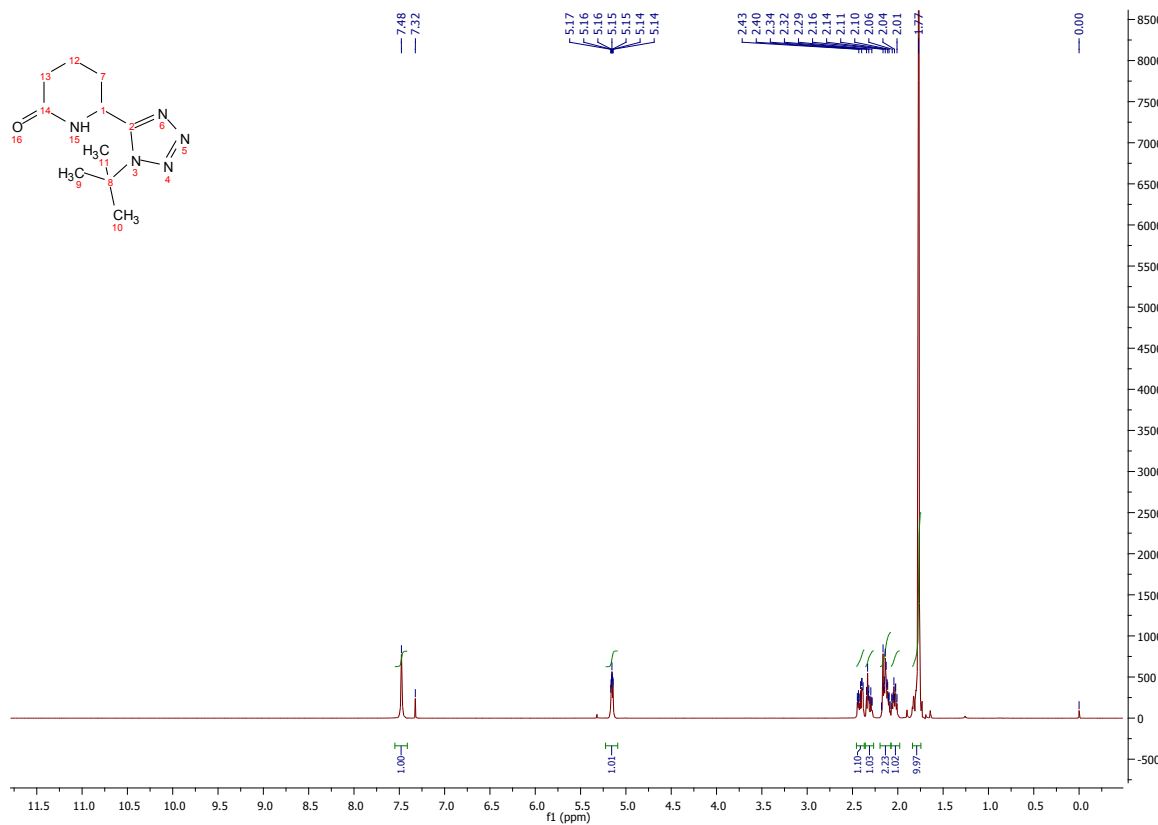

Compound **6f** <sup>13</sup>C NMR

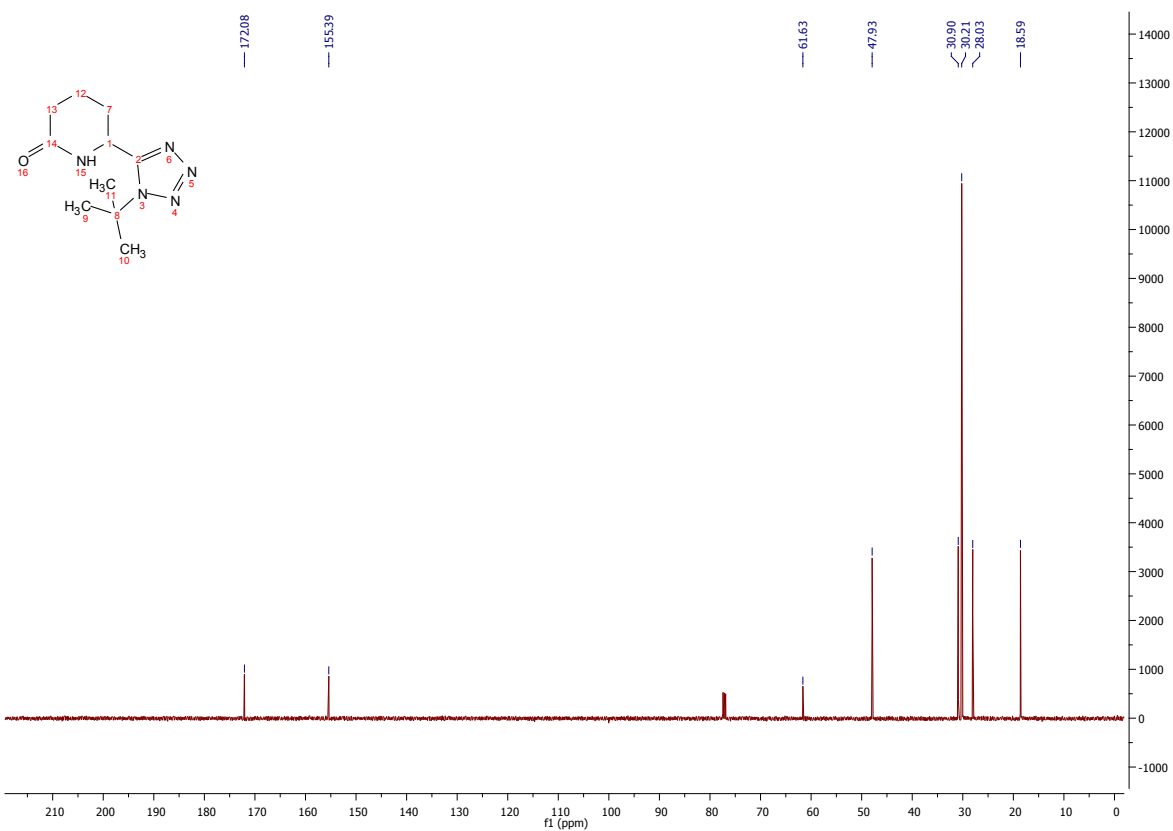

### Compound **6g** <sup>1</sup>H NMR

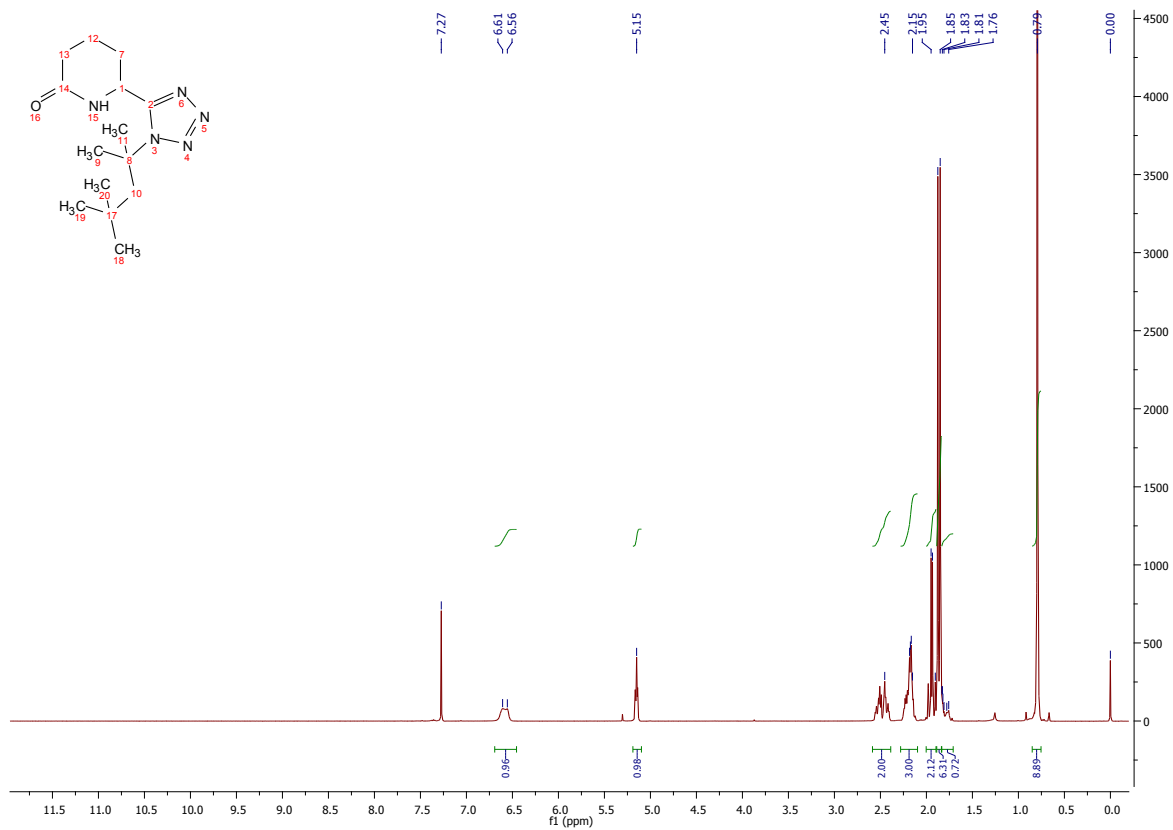

### Compound **6g** <sup>13</sup>C NMR

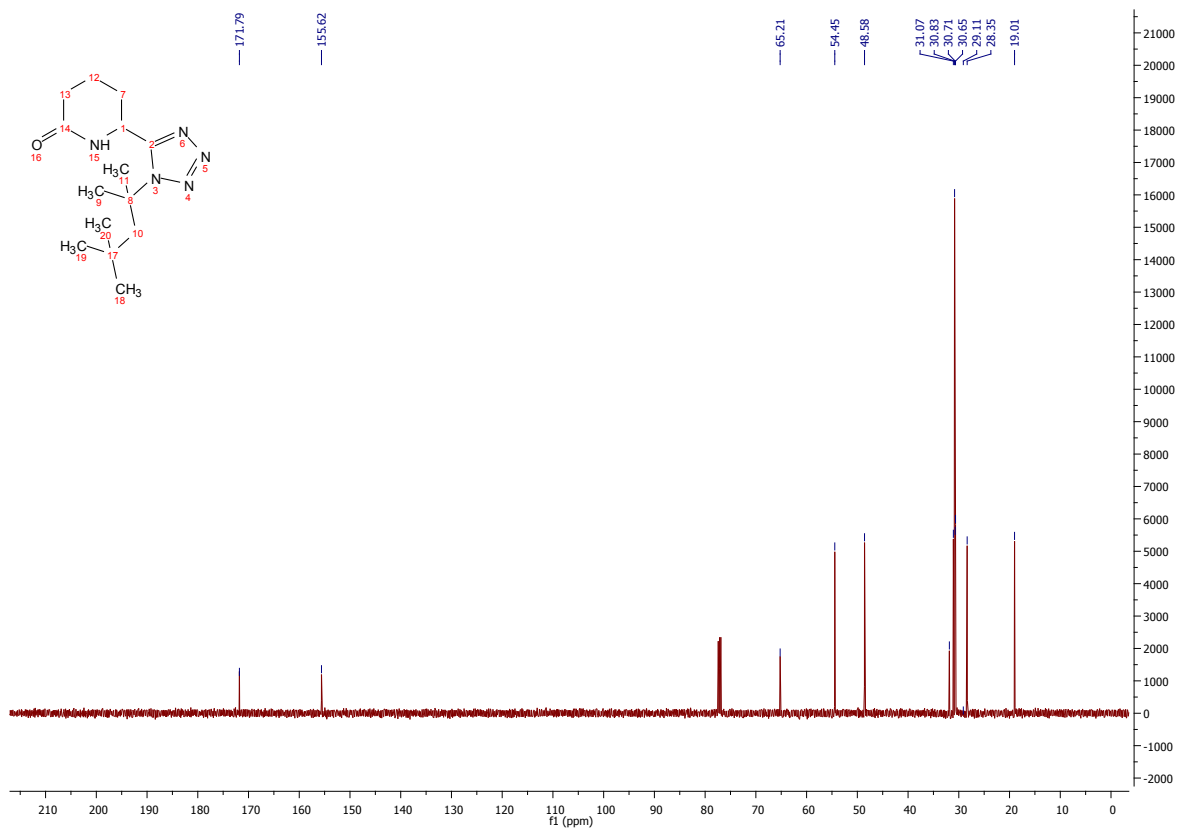

Compound **6h** <sup>1</sup>H NMR

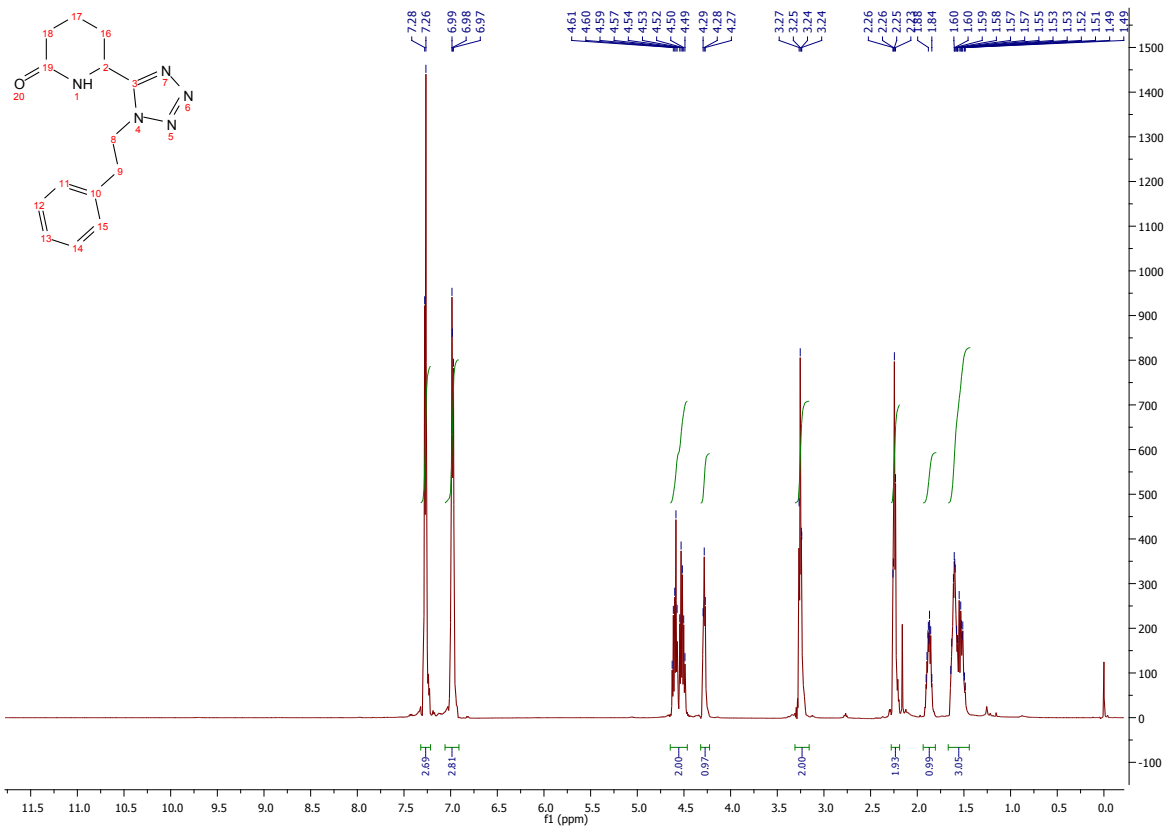

Compound **6h** <sup>13</sup>C NMR

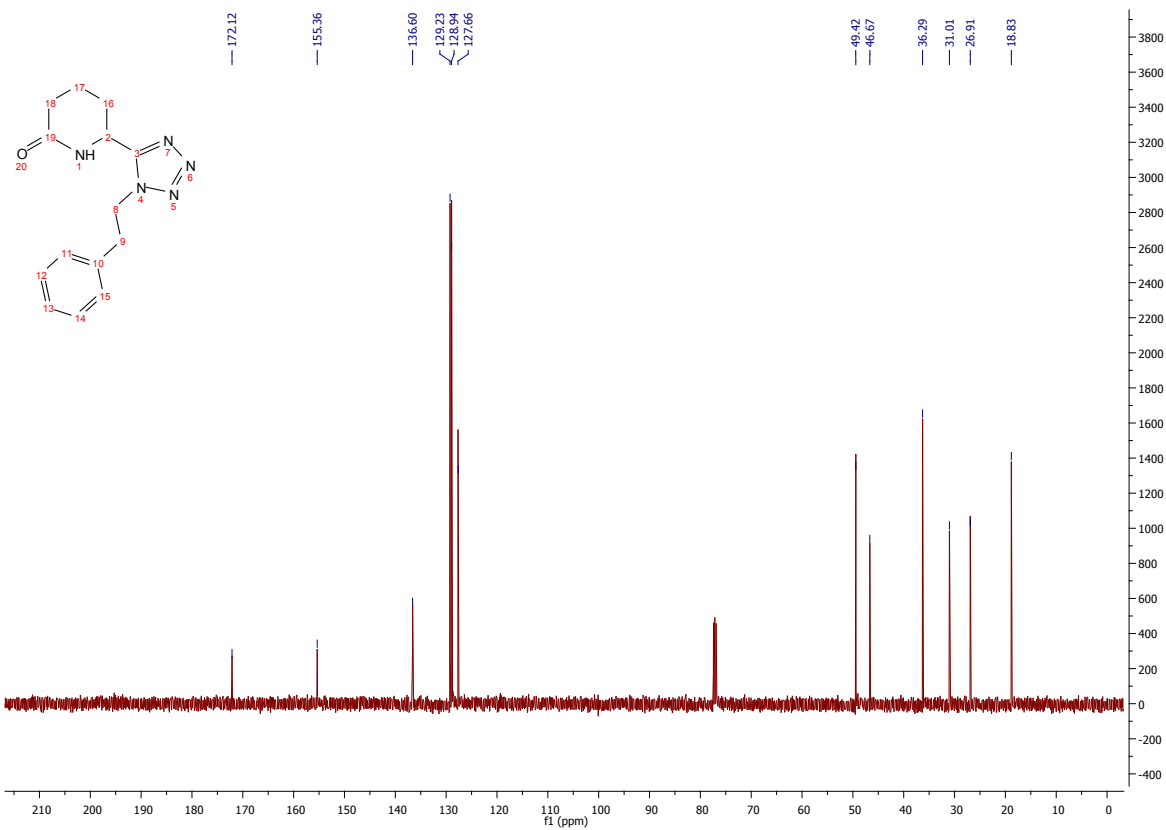

Compound **6i** <sup>1</sup>H NMR

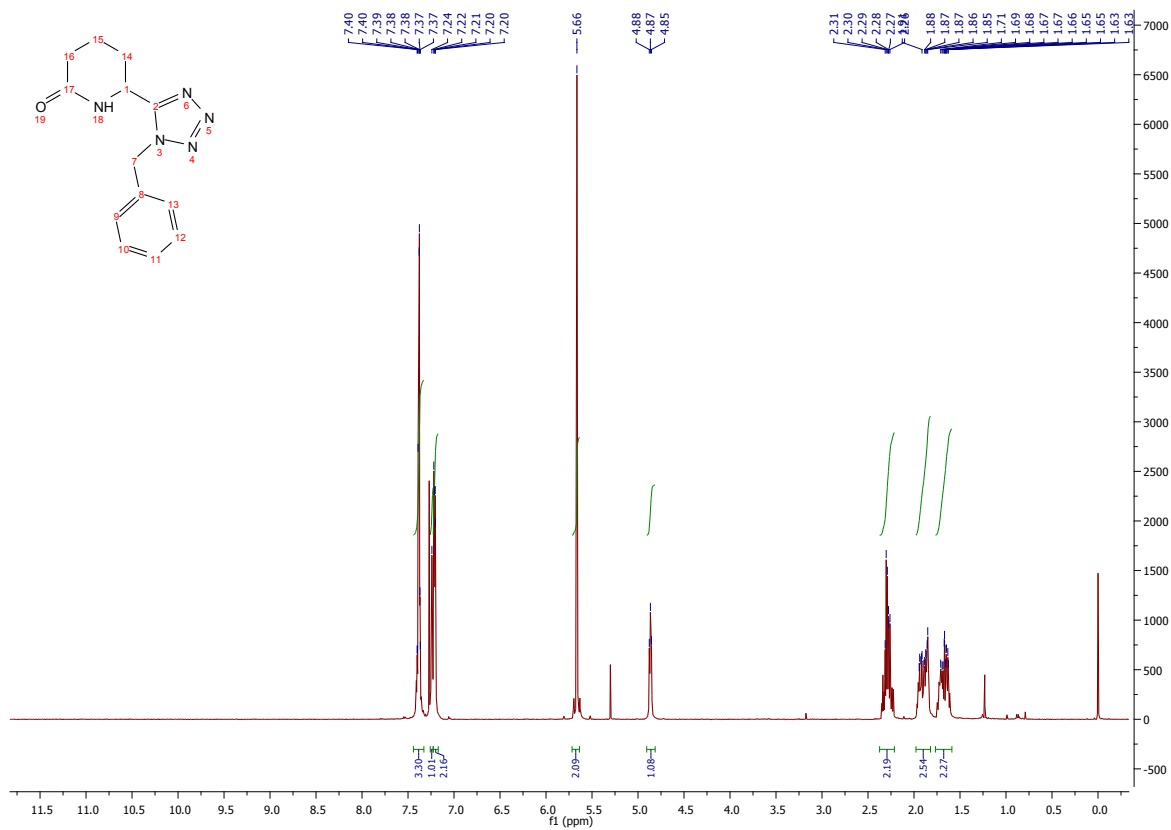

Compound **6i** <sup>13</sup>C NMR

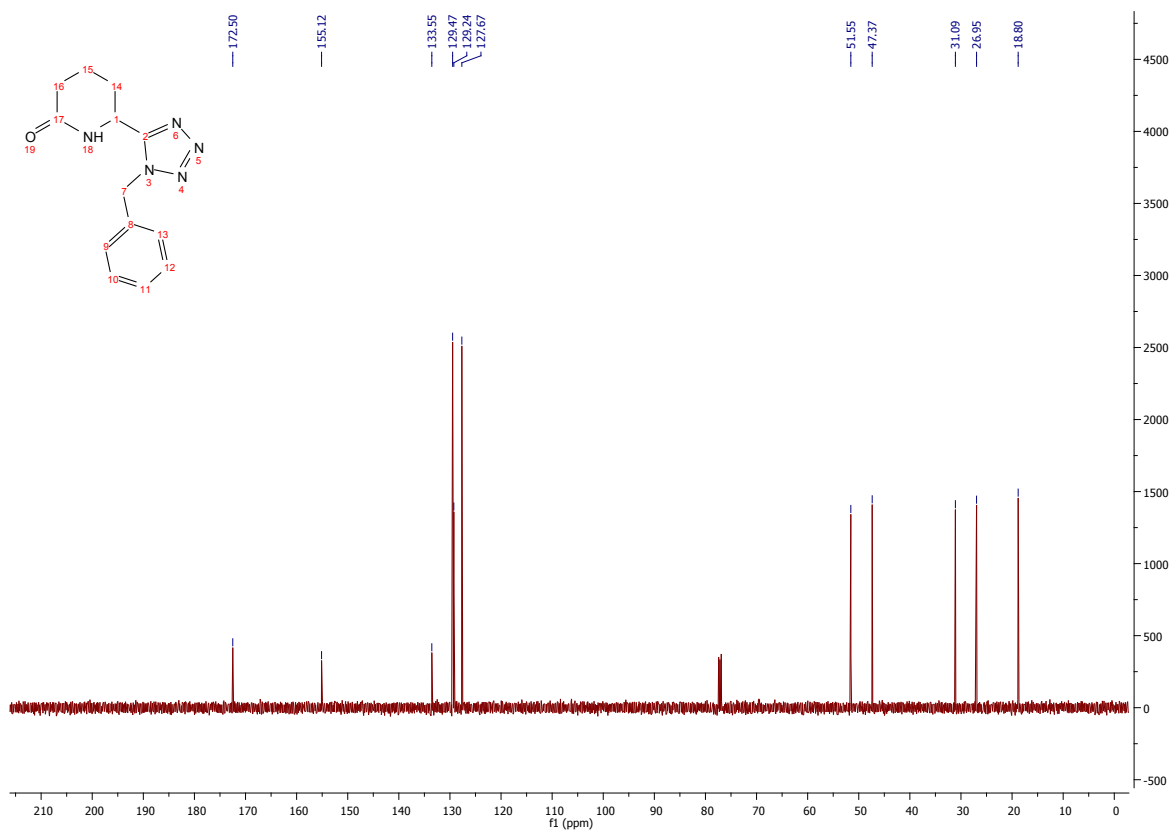

Compound 6j <sup>1</sup>H NMR

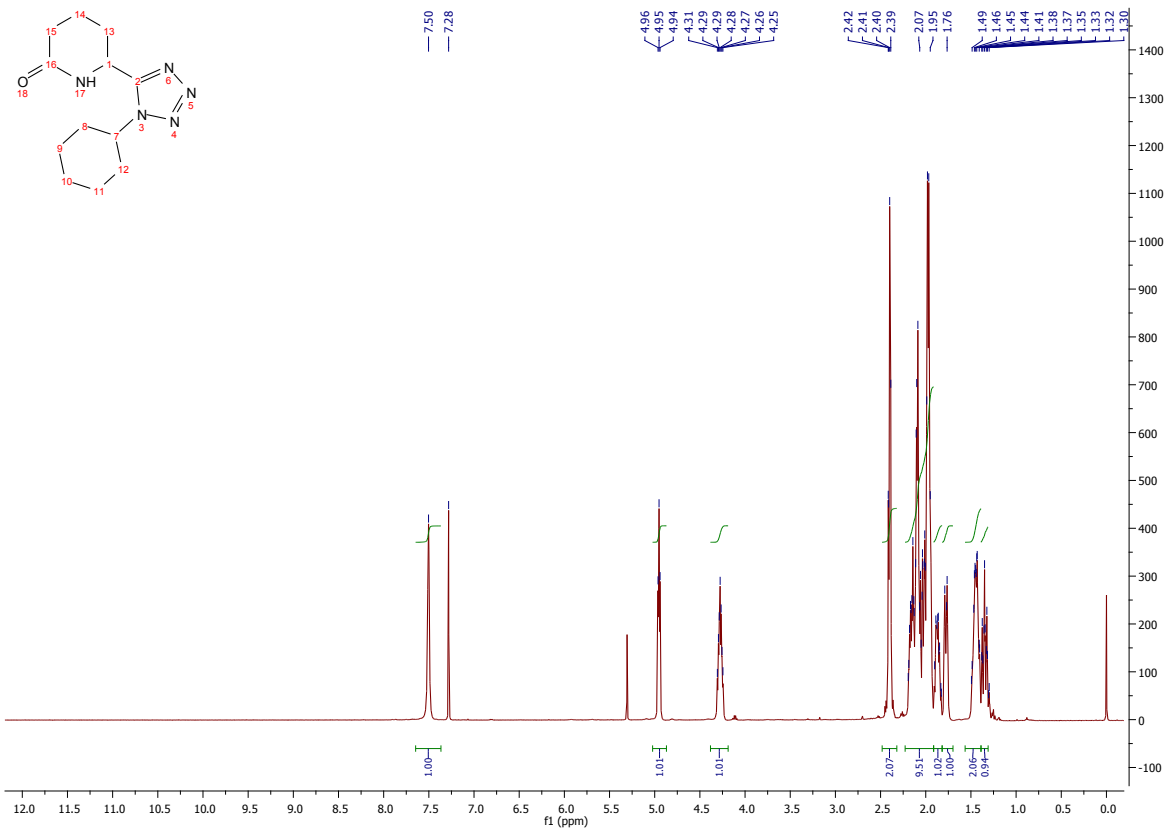

Compound 6j <sup>13</sup>C NMR

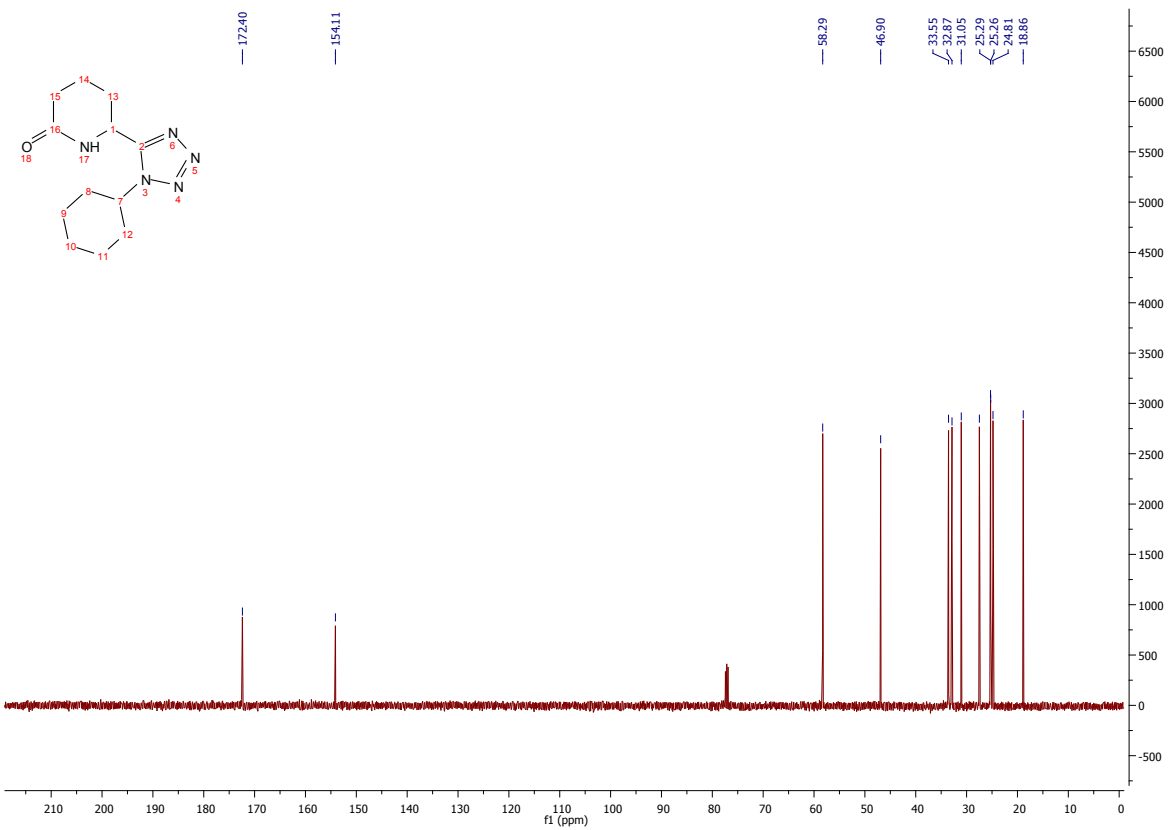

## Single Crystal X-Ray Structure Determination of Compounds 6b, 6e, 6f, and 6j

**6b:** correction for extinction effects

### Compound 6b

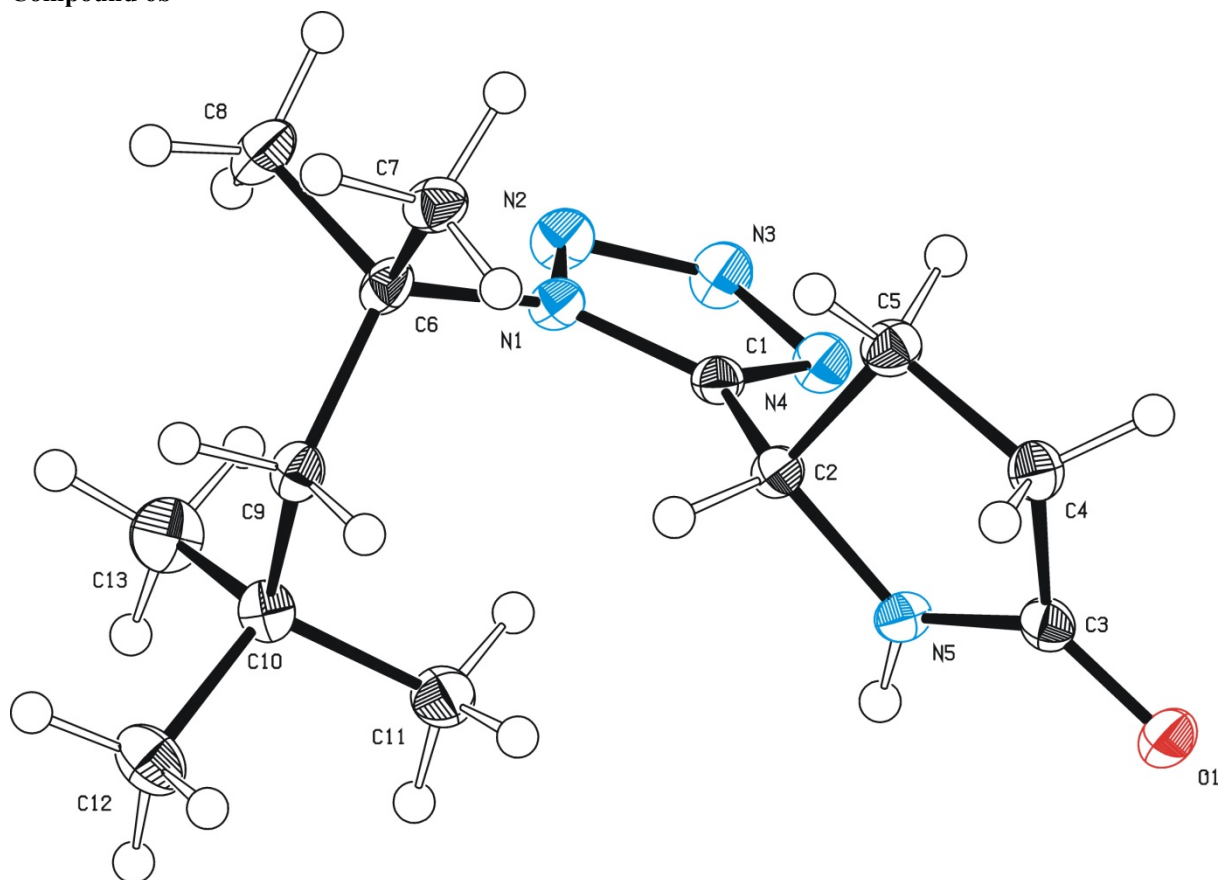

**Figure F1** – Ortep drawing drawing of compound **6b** with 50% ellipsoids. [6]

Colorless fragment

Crystal Size

Molecular Formula:

Crystal Color / Shape

Molecular Weight:

$F_{000}$ :

Systematic Absences:

Space Group:

Cell Constants:

Diffractometer:

Temperature:

Measurement Range:

Operator: \*\*\* Herdtweck \*\*\*

$C_{13}H_{23}N_5O$

Approximate size of crystal fragment used for data collection:

0.20 × 0.25 × 0.43 mm

265.36 a.m.u.

576

$h0l: l \neq 2n; 0k0: k \neq 2n$

Monoclinic  $P 2_1/c$  (I.T.-No.: 14)

Least-squares refinement of 9399 reflections with the programs "APEX suite"

and "SAINT" [1,2]; theta range  $2.28^\circ < \theta < 25.46^\circ$ ;  $Mo(K\alpha)$ ;  $\lambda = 71.073$  pm

$a = 907.24(2)$  pm

$b = 1147.13(3)$  pm  $\beta = 100.6508(13)^\circ$

$c = 1399.04(3)$  pm

$V = 1430.93(6) \cdot 10^6$  pm<sup>3</sup>;  $Z = 4$ ;  $D_{calc} = 1.232$  g cm<sup>-3</sup>; Mos. = 0.65

Kappa APEX II (Area Diffraction System; BRUKER AXS); sealed tube; graphite

monochromator; 50 kV; 30 mA;  $\lambda = 71.073$  pm;  $Mo(K\alpha)$

$(-173 \pm 1)^\circ C$ ;  $(100 \pm 1) K$

$2.28^\circ < \theta < 25.46^\circ$ ;  $h: -10/10, k: -13/13, l: -16/16$

Measurement Time: 2 × 15 s per film  
Measurement Mode: measured: 11 runs; 4743 films / scaled: 11 runs; 4743 films  
 $\varphi$ - and  $\omega$ -movement; Increment:  $\Delta\varphi/\Delta\omega = 0.50^\circ$ ; dx = 40.0 mm  
LP - Correction: Yes [2]  
Intensity Correction: No/Yes; during scaling [2]  
Absorption Correction: Multi-scan; during scaling;  $\mu = 0.082 \text{ mm}^{-1}$  [2]  
Correction Factors:  $T_{\min} = 0.7079$   $T_{\max} = 0.7452$   
Reflection Data: 48744 reflections were integrated and scaled  
1510 reflections systematic absent and rejected  
47234 reflections to be merged  
2636 independent reflections  
0.020  $R_{\text{int}}$ : (basis  $F_o^2$ )  
2636 independent reflections (all) were used in refinements  
2468 independent reflections with  $I_o > 2\sigma(I_o)$   
100.0 % completeness of the data set  
265 parameter full-matrix refinement  
9.9 reflections per parameter  
Solution: Direct Methods [3, 7]; Difference Fourier syntheses  
Refinement Parameters: In the asymmetric unit:  
19 Non-hydrogen atoms with anisotropic displacement parameters  
23 Hydrogen atoms with isotropic displacement parameters  
Hydrogen Atoms: All hydrogen atom positions were found in the difference map calculated from the model containing all non-hydrogen atoms. The hydrogen positions were refined with individual isotropic displacement parameters.  
Atomic Form Factors: For neutral atoms and anomalous dispersion [4, 5, 7]  
Extinction Correction:  $F_c(\text{korr}) = kF_c[1 + 0.001 \cdot \varepsilon \cdot F_c^2 \cdot \lambda^3/\sin(2\theta)]^{-1/4}$   
SHELXL-97 [5, 7]  $\varepsilon$  refined to  $\varepsilon = 0.0054(9)$   
Weighting Scheme:  $w^{-1} = \sigma^2(F_o^2) + (a \cdot P)^2 + b \cdot P$   
with a: 0.0362; b: 0.5542; P:  $[\text{Maximum}(0 \text{ or } F_o^2) + 2 \cdot F_c^2]/3$   
Shift/Err: Less than 0.001 in the last cycle of refinement:  
Resid. Electron Density: +0.28 e $\text{Error!}/\text{\AA}^3$ ; -0.17 e $\text{Error!}/\text{\AA}^3$   
R1:  $\Sigma(|F_o| - |F_c|)/\Sigma|F_o|$   
 $[F_o > 4\sigma(F_o)]; \text{ N}=2468]:$  = 0.0302  
 $[\text{all refltns}; \text{ N}=2636]:$  = 0.0320  
wR2:  $[\Sigma w(F_o^2 - F_c^2)^2/\Sigma w(F_o^2)^2]^{1/2}$   
 $[F_o > 4\sigma(F_o)]; \text{ N}=2468]:$  = 0.0748  
 $[\text{all refltns}; \text{ N}=2636]:$  = 0.0764  
Goodness of fit:  $[\Sigma w(F_o^2 - F_c^2)^2/(\text{NO}-\text{NV})]^{1/2}$  = 1.033  
Remarks: Refinement expression  $\Sigma w(F_o^2 - F_c^2)^2$

**Compound 6e**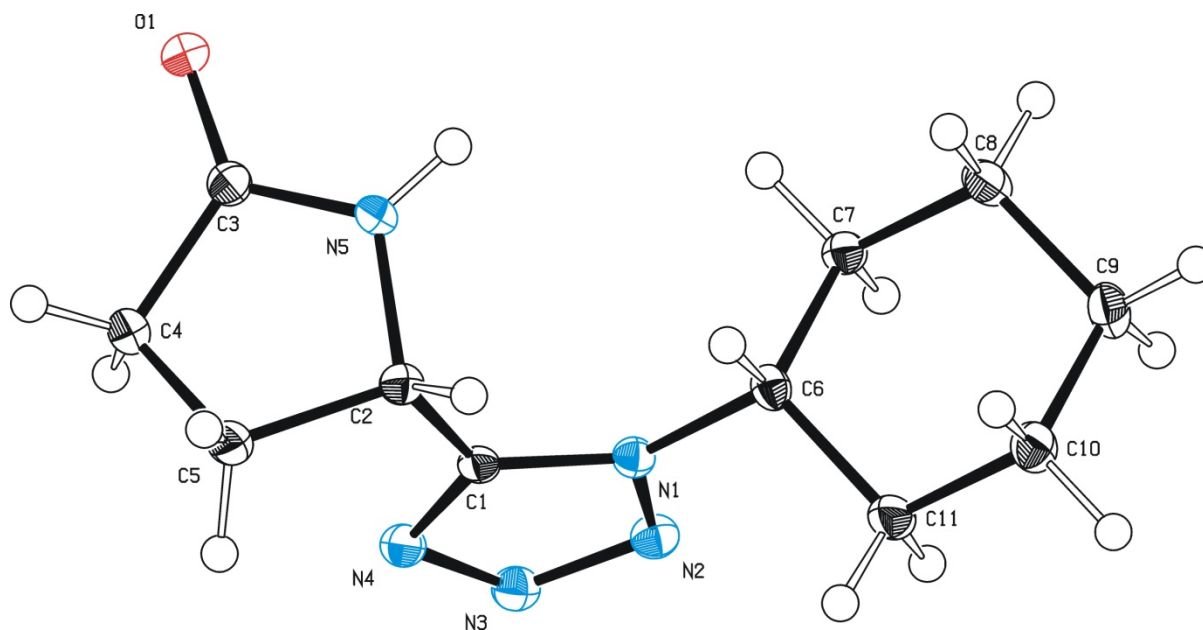**Figure F2** – Ortep drawing drawing of compound **6e** with 50% ellipsoids. [6]

|                        |                                                                                                                                                                                                                                                                                                                                                                                                                                                                       |
|------------------------|-----------------------------------------------------------------------------------------------------------------------------------------------------------------------------------------------------------------------------------------------------------------------------------------------------------------------------------------------------------------------------------------------------------------------------------------------------------------------|
| Operator:              | *** Herdtweck ***                                                                                                                                                                                                                                                                                                                                                                                                                                                     |
| Molecular Formula:     | C <sub>11</sub> H <sub>17</sub> N <sub>5</sub> O                                                                                                                                                                                                                                                                                                                                                                                                                      |
| Crystal Color / Shape  | Colorless fragment                                                                                                                                                                                                                                                                                                                                                                                                                                                    |
| Crystal Size           | Approximate size of crystal fragment used for data collection:<br>0.28 × 0.41 × 0.51 mm                                                                                                                                                                                                                                                                                                                                                                               |
| Molecular Weight:      | 235.30 a.m.u.                                                                                                                                                                                                                                                                                                                                                                                                                                                         |
| F <sub>000</sub> :     | 252                                                                                                                                                                                                                                                                                                                                                                                                                                                                   |
| Systematic Absences:   | none                                                                                                                                                                                                                                                                                                                                                                                                                                                                  |
| Space Group:           | Triclinic $P\bar{1}$ (I.T.-No.: 2)                                                                                                                                                                                                                                                                                                                                                                                                                                    |
| Cell Constants:        | Least-squares refinement of 9939 reflections with the programs "APEX suite" and "SAINT" [1,2]; theta range $2.14^\circ < \theta < 25.38^\circ$ ; Mo(K $\alpha$ ); $\lambda = 71.073$ pm<br>$a = 654.62(2)$ pm $\alpha = 65.9412(10)^\circ$<br>$b = 925.70(2)$ pm $\beta = 81.5752(11)^\circ$<br>$c = 1055.29(3)$ pm $\gamma = 89.9391(11)^\circ$<br>$V = 576.41(3) \cdot 10^6$ pm <sup>3</sup> ; $Z = 2$ ; $D_{\text{calc}} = 1.356$ g cm <sup>-3</sup> ; Mos. = 0.64 |
| Diffractometer:        | Kappa APEX II (Area Diffraction System; BRUKER AXS); sealed tube; graphite monochromator; 50 kV; 30 mA; $\lambda = 71.073$ pm; Mo(K $\alpha$ )                                                                                                                                                                                                                                                                                                                        |
| Temperature:           | (-173±1) °C; (100±1) K                                                                                                                                                                                                                                                                                                                                                                                                                                                |
| Measurement Range:     | $2.14 < \theta < 25.38^\circ$ ; h: -7/7, k: -11/11, l: -12/12                                                                                                                                                                                                                                                                                                                                                                                                         |
| Measurement Time:      | 2 × 15 s per film                                                                                                                                                                                                                                                                                                                                                                                                                                                     |
| Measurement Mode:      | measured: 14 runs; 5785 films / scaled: 14 runs; 5785 films<br>$\varphi$ - and $\omega$ -movement; Increment: $\Delta\varphi/\Delta\omega = 0.50^\circ$ ; dx = 35.0 mm                                                                                                                                                                                                                                                                                                |
| LP - Correction:       | Yes [2]                                                                                                                                                                                                                                                                                                                                                                                                                                                               |
| Intensity Correction   | No/Yes; during scaling [2]                                                                                                                                                                                                                                                                                                                                                                                                                                            |
| Absorption Correction: | Multi-scan; during scaling; $\mu = 0.093$ mm <sup>-1</sup> [2]                                                                                                                                                                                                                                                                                                                                                                                                        |
| Reflection Data:       | Correction Factors: $T_{\text{min}} = 0.6876$ $T_{\text{max}} = 0.7452$<br>19536 reflections were integrated and scaled<br>19536 reflections to be merged<br>2111 independent reflections                                                                                                                                                                                                                                                                             |



|                          |          |                                                                                                                                                                                                                  |          |
|--------------------------|----------|------------------------------------------------------------------------------------------------------------------------------------------------------------------------------------------------------------------|----------|
|                          | 0.016    | $R_{\text{int}}$ : (basis $F_o^2$ )                                                                                                                                                                              |          |
|                          | 2111     | independent reflections (all) were used in refinements                                                                                                                                                           |          |
|                          | 2033     | independent reflections with $I_o > 2\sigma(I_o)$                                                                                                                                                                |          |
|                          | 99.9 %   | completeness of the data set                                                                                                                                                                                     |          |
|                          | 222      | parameter full-matrix refinement                                                                                                                                                                                 |          |
|                          | 9.5      | reflections per parameter                                                                                                                                                                                        |          |
| Solution:                |          | Direct Methods [3, 7]; Difference Fourier syntheses                                                                                                                                                              |          |
| Refinement Parameters:   |          | In the asymmetric unit:                                                                                                                                                                                          |          |
|                          | 17       | Non-hydrogen atoms with anisotropic displacement parameters                                                                                                                                                      |          |
|                          | 17       | Hydrogen atoms with isotropic displacement parameters                                                                                                                                                            |          |
| Hydrogen Atoms:          |          | All hydrogen atom positions were found in the difference map calculated from the model containing all non-hydrogen atoms. The hydrogen positions were refined with individual isotropic displacement parameters. |          |
| Atomic Form Factors:     |          | For neutral atoms and anomalous dispersion [4, 5, 7]                                                                                                                                                             |          |
| Extinction Correction:   |          | no                                                                                                                                                                                                               |          |
| Weighting Scheme:        |          | $w^{-1} = \sigma^2(F_o^2) + (a * P)^2 + b * P$<br>with a: 0.0400; b: 0.2260; P: [Maximum(0 or $F_o^2$ ) + 2 * $F_c^2$ ]/3                                                                                        |          |
| Shift/Err:               |          | Less than 0.001 in the last cycle of refinement:                                                                                                                                                                 |          |
| Resid. Electron Density: |          | +0.26 e <del>Error!</del> /Å <sup>3</sup> ; -0.23 e <del>Error!</del> /Å <sup>3</sup>                                                                                                                            |          |
| R1:                      |          | $\sum( F_o  -  F_c ) / \sum  F_o $                                                                                                                                                                               |          |
| [ $F_o > 4\sigma(F_o)$ ; | N=2033]: |                                                                                                                                                                                                                  | = 0.0303 |
| [all reflctns;           | N=2111]: |                                                                                                                                                                                                                  | = 0.0312 |
| wR2:                     |          | $[\sum w(F_o^2 - F_c^2)^2 / \sum w(F_o^2)^2]^{1/2}$                                                                                                                                                              |          |
| [ $F_o > 4\sigma(F_o)$ ; | N=2033]: |                                                                                                                                                                                                                  | = 0.0765 |
| [all reflctns;           | N=2111]: |                                                                                                                                                                                                                  | = 0.0774 |
| Goodness of fit:         |          | $[\sum w(F_o^2 - F_c^2)^2 / (\text{NO} - \text{NV})]^{1/2}$                                                                                                                                                      | = 1.050  |
| Remarks:                 |          | Refinement expression $\sum w(F_o^2 - F_c^2)^2$                                                                                                                                                                  |          |

**Compound 6f**

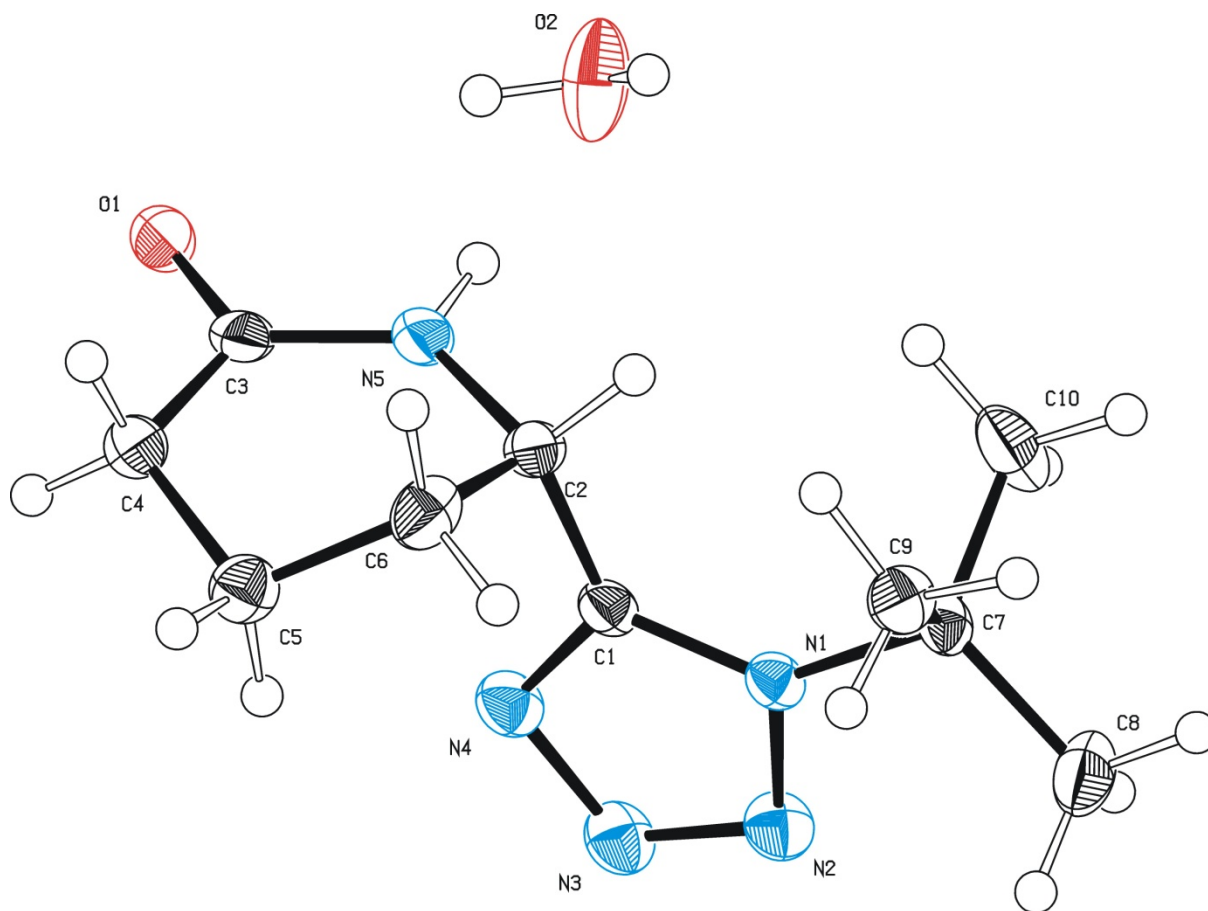

**Figure F3** – Ortep drawing drawing of compound **6f** with 50% ellipsoids. [6]

|                       |                                                                                                                                                               |               |                  |
|-----------------------|---------------------------------------------------------------------------------------------------------------------------------------------------------------|---------------|------------------|
| Operator:             | *** Herdtweck ***                                                                                                                                             |               |                  |
| Molecular Formula:    | C <sub>20</sub> H <sub>36</sub> N <sub>10</sub> O <sub>3</sub><br>2(C <sub>10</sub> H <sub>17</sub> N <sub>5</sub> O), (H <sub>2</sub> O)                     |               |                  |
| Crystal Color / Shape | Colourless fragment                                                                                                                                           |               |                  |
| Crystal Size          | Approximate size of crystal fragment used for data collection:<br>0.10 × 0.30 × 0.36 mm                                                                       |               |                  |
| Molecular Weight:     | 464.59 a.m.u.                                                                                                                                                 |               |                  |
| F <sub>000</sub> :    | 1000                                                                                                                                                          |               |                  |
| Systematic Absences:  | hkl: h+k≠2n; h0l: l≠2n                                                                                                                                        |               |                  |
| Space Group:          | Monoclinic                                                                                                                                                    | C 2/c         | (I.T.-No.: 15)   |
| Cell Constants:       | Least-squares refinement of 9875 reflections with the programs "APEX suite" and "SAINT" [1,2]; theta range 1.63° < θ < 25.55°; Mo(K $\alpha$ ); λ = 71.073 pm |               |                  |
|                       | a =                                                                                                                                                           | 2660.36(6) pm |                  |
|                       | b =                                                                                                                                                           | 630.28(1) pm  | β = 109.7809(9)° |
|                       | c =                                                                                                                                                           | 1546.66(3) pm |                  |
|                       | V = 2440.37(8) · 10 <sup>6</sup> pm <sup>3</sup> ; Z = 4; D <sub>calc</sub> = 1.265 g cm <sup>-3</sup> ; Mos. = 0.60                                          |               |                  |
| Diffractometer:       | Kappa APEX II (Area Diffraction System; BRUKER AXS); sealed tube; graphite monochromator; 50 kV; 30 mA; λ = 71.073 pm; Mo(K $\alpha$ )                        |               |                  |
| Temperature:          | (-150±1) °C;                                                                                                                                                  |               | (123±1) K        |
| Measurement Range:    | 1.63° < θ < 25.55°; h: -32/32, k: -7/7, l: -18/18                                                                                                             |               |                  |
| Measurement Time:     | 2 × 15 s per film                                                                                                                                             |               |                  |

Measurement Mode: measured: 7 runs; 3306 films / scaled: 7 runs; 3306 films  
 $\varphi$ - and  $\omega$ -movement; Increment:  $\Delta\varphi/\Delta\omega = 0.50^\circ$ ; dx = 40.0 mm

LP - Correction: Yes [2]

Intensity Correction: No/Yes; during scaling [2]

Absorption Correction: Multi-scan; during scaling;  $\mu = 0.089 \text{ mm}^{-1}$  [2]  
 Correction Factors:  $T_{\min} = 0.6993$   $T_{\max} = 0.7452$

Removing solvent molecules: Besides the solvent molecule, well located in the difference Fourier maps, unresolved solvent molecules remained and had to be removed with the SQUEEZE procedure. [6]

Reflection Data: 35663 reflections were integrated and scaled  
 2031 reflections systematic absent and rejected  
 33632 reflections to be merged  
 2264 independent reflections  
 0.026  $R_{\text{int}}$ : (basis  $F_o^2$ )  
 2264 independent reflections (all) were used in refinements  
 2037 independent reflections with  $I_o > 2\sigma(I_o)$   
 98.7 % completeness of the data set  
 222 parameter full-matrix refinement  
 10.2 reflections per parameter

Solution: Direct Methods [3, 7]; Difference Fourier syntheses

Refinement Parameters: In the asymmetric unit:  
 17 Non-hydrogen atoms with anisotropic displacement parameters  
 18 Hydrogen atoms with isotropic displacement parameters

Hydrogen Atoms: All hydrogen atom positions were found in the difference map calculated from the model containing all non-hydrogen atoms. The hydrogen positions were refined with individual isotropic displacement parameters.

Atomic Form Factors: For neutral atoms and anomalous dispersion [4, 5, 7]

Extinction Correction: no

Weighting Scheme:  $w^{-1} = \sigma^2(F_o^2) + (a * P)^2 + b * P$   
 with a: 0.0466; b: 1.7210; P: [Maximum(0 or  $F_o^2$ ) + 2 \*  $F_c^2$ ] / 3

Shift/Err: Less than 0.001 in the last cycle of refinement:

Resid. Electron Density: +0.19 eError!/ $\text{\AA}^3$ ; -0.18 eError!/ $\text{\AA}^3$

R1:  $\Sigma(|F_o| - |F_c|) / \Sigma|F_o|$

[ $F_o > 4\sigma(F_o)$ ; N=2037]: = 0.0348  
 [all reflctns; N=2264]: = 0.0385

wR2:  $[\Sigma w(F_o^2 - F_c^2)^2 / \Sigma w(F_o^2)^2]^{1/2}$

[ $F_o > 4\sigma(F_o)$ ; N=2037]: = 0.0887  
 [all reflctns; N=2264]: = 0.0911

Goodness of fit:  $[\Sigma w(F_o^2 - F_c^2)^2 / (\text{NO-NV})]^{1/2}$  = 1.049

Remarks: Refinement expression  $\Sigma w(F_o^2 - F_c^2)^2$

## Compound 6j

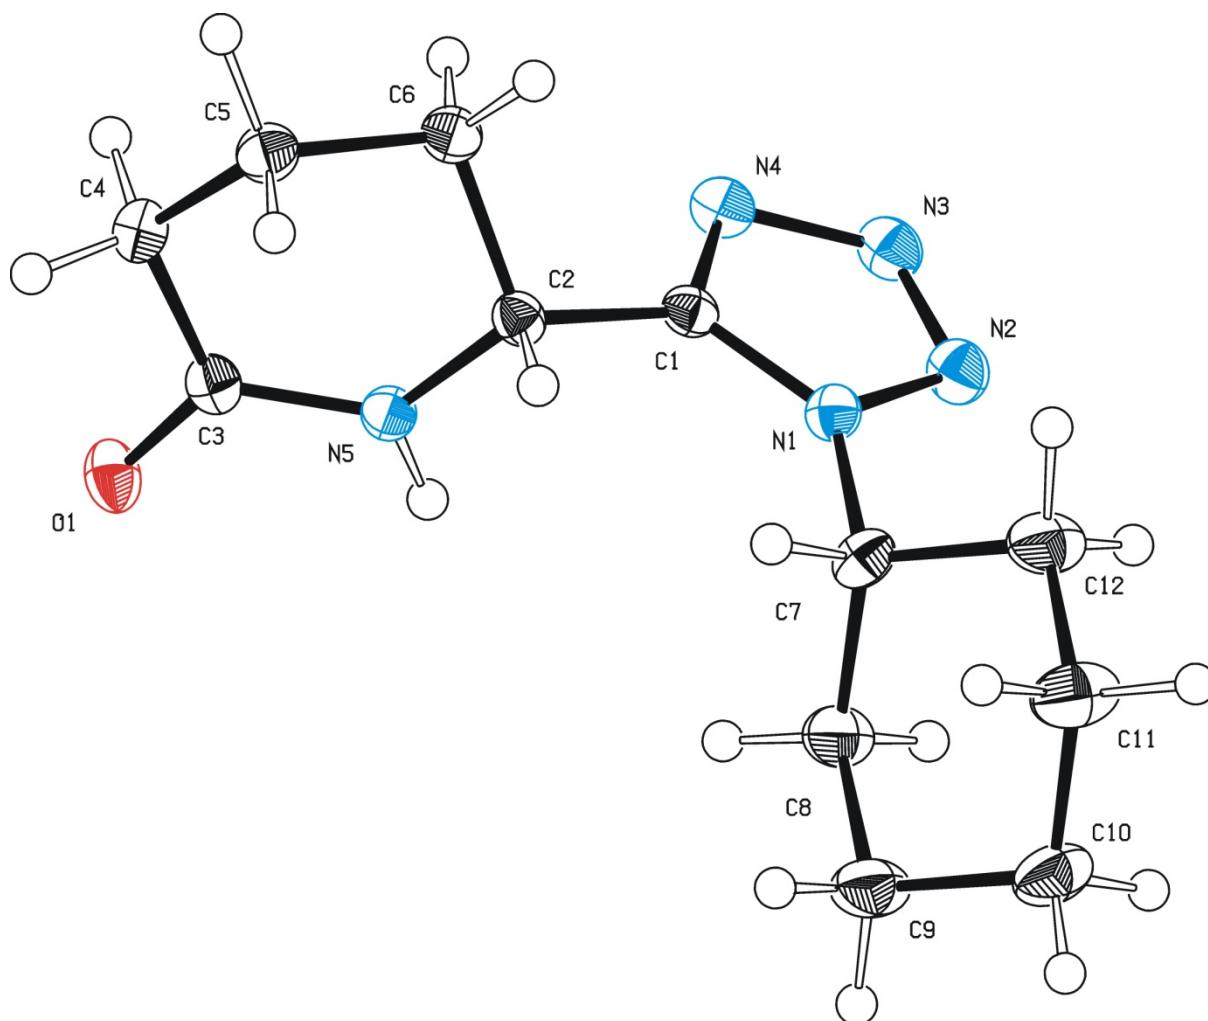

**Figure F4** – Ortep drawing drawing of compound **6j** with 50% ellipsoids. [6]

|                       |                                                                                                                                                                                                                                                                                                                                                                                  |
|-----------------------|----------------------------------------------------------------------------------------------------------------------------------------------------------------------------------------------------------------------------------------------------------------------------------------------------------------------------------------------------------------------------------|
| Operator:             | *** Herdtweck ***                                                                                                                                                                                                                                                                                                                                                                |
| Molecular Formula:    | $C_{12}H_{19}N_5O$                                                                                                                                                                                                                                                                                                                                                               |
| Crystal Color / Shape | Colorless fragment                                                                                                                                                                                                                                                                                                                                                               |
| Crystal Size          | Approximate size of crystal fragment used for data collection:<br>$0.25 \times 0.25 \times 0.28$ mm                                                                                                                                                                                                                                                                              |
| Molecular Weight:     | 249.32 a.m.u.                                                                                                                                                                                                                                                                                                                                                                    |
| $F_{000}$ :           | 1072                                                                                                                                                                                                                                                                                                                                                                             |
| Systematic Absences:  | $0kl: k \neq 2n; h0l: l \neq 2n; hk0: h \neq 2n$                                                                                                                                                                                                                                                                                                                                 |
| Space Group:          | Orthorhombic $P bca$ (I.T.-No.: 61)                                                                                                                                                                                                                                                                                                                                              |
| Cell Constants:       | Least-squares refinement of 9968 reflections with the programs "APEX suite" and "SAINT" [1,2]; theta range $2.79^\circ < \theta < 25.40^\circ$ ; $Mo(K\bar{\alpha})$ ; $\lambda = 71.073$ pm<br>$a = 991.62(3)$ pm<br>$b = 1193.89(3)$ pm<br>$c = 2152.52(7)$ pm<br>$V = 2548.34(13) \cdot 10^6$ pm <sup>3</sup> ; $Z = 8$ ; $D_{calc} = 1.300$ g cm <sup>-3</sup> ; Mos. = 0.67 |
| Diffractionmeter:     | Kappa APEX II (Area Diffraction System; BRUKER AXS); sealed tube; graphite monochromator; 50 kV; 30 mA; $\lambda = 71.073$ pm; $Mo(K\bar{\alpha})$                                                                                                                                                                                                                               |
| Temperature:          | $(-150 \pm 1)^\circ C$ ; (123 ± 1) K                                                                                                                                                                                                                                                                                                                                             |
| Measurement Range:    | $2.79^\circ < \theta < 25.40^\circ$ ; h: -11/11, k: -14/14, l: -25/25                                                                                                                                                                                                                                                                                                            |
| Measurement Time:     | $2 \times 10$ s per film                                                                                                                                                                                                                                                                                                                                                         |

Measurement Mode: measured: 6 runs; 3381 films / scaled: 6 runs; 3381 films  
 $\varphi$ - and  $\omega$ -movement; Increment:  $\Delta\varphi/\Delta\omega = 0.50^\circ$ ; dx = 60.0 mm

LP - Correction: Yes [2]

Intensity Correction: No/Yes; during scaling [2]

Absorption Correction: Multi-scan; during scaling;  $\mu = 0.088 \text{ mm}^{-1}$  [2]

Correction Factors:  $T_{\min} = 0.7060$   $T_{\max} = 0.7452$

Reflection Data: 34576 reflections were integrated and scaled  
3008 reflections systematic absent and rejected  
2 obvious wrong intensity and rejected (one hkl)  
31566 reflections to be merged  
2338 independent reflections  
0.028  $R_{\text{int}}$ : (basis  $F_o^2$ )  
2338 independent reflections (all) were used in refinements  
2085 independent reflections with  $I_o > 2\sigma(I_o)$   
99.9 % completeness of the data set  
239 parameter full-matrix refinement  
9.8 reflections per parameter

Solution: Direct Methods [3, 7]; Difference Fourier syntheses

Refinement Parameters: In the asymmetric unit:  
18 Non-hydrogen atoms with anisotropic displacement parameters  
19 Hydrogen atoms with isotropic displacement parameters

Hydrogen Atoms: All hydrogen atom positions were found in the difference map calculated from the model containing all non-hydrogen atoms. The hydrogen positions were refined with individual isotropic displacement parameters.

Atomic Form Factors: For neutral atoms and anomalous dispersion [4, 5, 7]

Extinction Correction: no

Weighting Scheme:  $w^{-1} = \sigma^2(F_o^2) + (a*P)^2 + b*P$   
with a: 0.0491; b: 1.2420; P: [Maximum(0 or  $F_o^2$ ) + 2\* $F_c^2$ ]/3

Shift/Err: Less than 0.001 in the last cycle of refinement:

Resid. Electron Density: +0.24 e~~Error!~~/Å<sup>3</sup>; -0.24 e~~Error!~~/Å<sup>3</sup>

R1:  $\Sigma(|F_o| - |F_c|) / \Sigma|F_o|$

[ $F_o > 4\sigma(F_o)$ ; N=2085]: = 0.0359  
[all refltns; N=2338]: = 0.0407

wR2:  $[\Sigma w(F_o^2 - F_c^2)^2 / \Sigma w(F_o^2)^2]^{1/2}$

[ $F_o > 4\sigma(F_o)$ ; N=2085]: = 0.0959  
[all refltns; N=2338]: = 0.0994

Goodness of fit:  $[\Sigma w(F_o^2 - F_c^2)^2 / (\text{NO-NV})]^{1/2}$  = 1.082

Remarks: Refinement expression  $\Sigma w(F_o^2 - F_c^2)^2$

### References:

- [1] APEX suite of crystallographic software. APEX 2 Version 2008.4. Bruker AXS Inc., Madison, Wisconsin, USA (2008).
- [2] SAINT, Version 7.56a and SADABS Version 2008/1. Bruker AXS Inc., Madison, Wisconsin, USA (2008).
- [3] Altomare, A.; Cascarano, G.; Giacovazzo, C.; Guagliardi, A.; Burla, M. C.; Polidori, G.; Camalli M. "SIR92", *J. Appl. Cryst.* **1994**, 27, 435-436.

- [4] International Tables for Crystallography, Vol. C, Tables 6.1.1.4 (pp. 500-502), 4.2.6.8 (pp. 219-222), and 4.2.4.2 (pp. 193-199), Wilson, A. J. C., Ed., Kluwer Academic Publishers, Dordrecht, The Netherlands, 1992.
- [5] Sheldrick, G. M. "SHELXL-97", University of Göttingen, Göttingen, Germany, (1998).
- [6] Spek, A. L. "PLATON", A Multipurpose Crystallographic Tool, Utrecht University, Utrecht, The Netherlands, (2010).
- [7] L. J. Farrugia, "WinGX (Version 1.70.01 January 2005) ", *J. Appl. Cryst.* **1999**, 32, 837-838.

# SFC-MS Chromatograms of compounds 6a-j

## Compound 6a SFC-MS

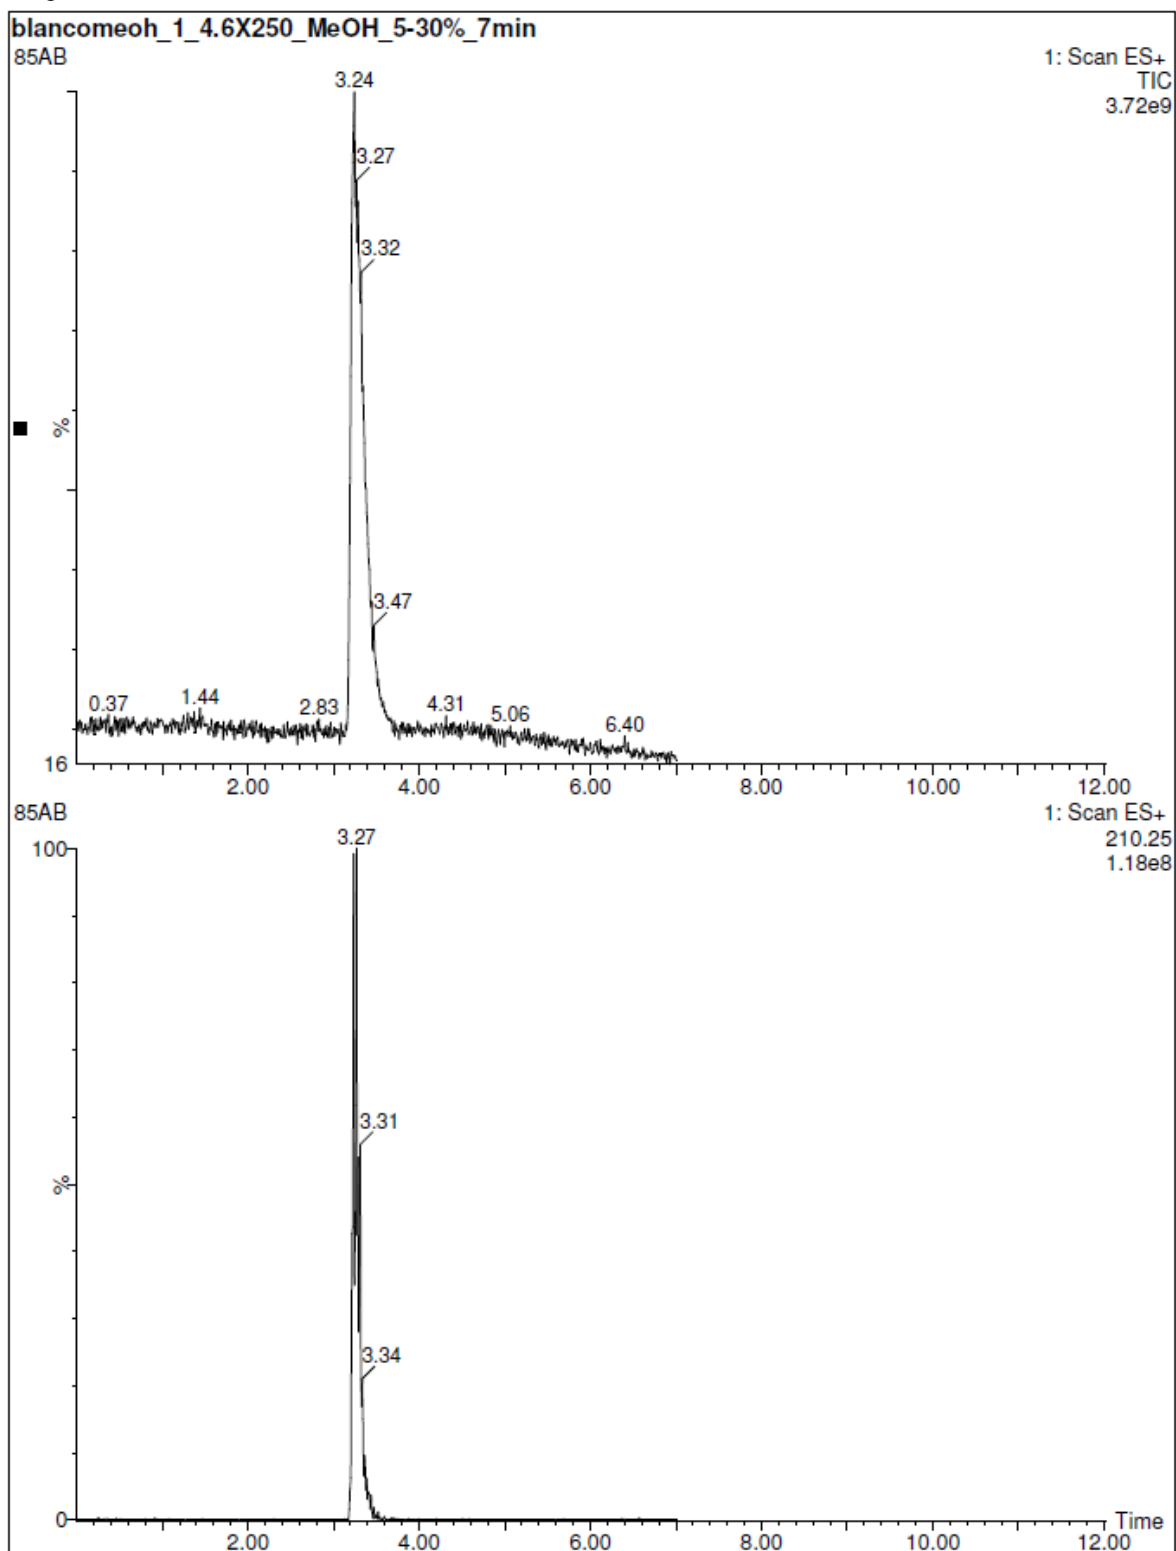

Compound **6b** SFC-MS

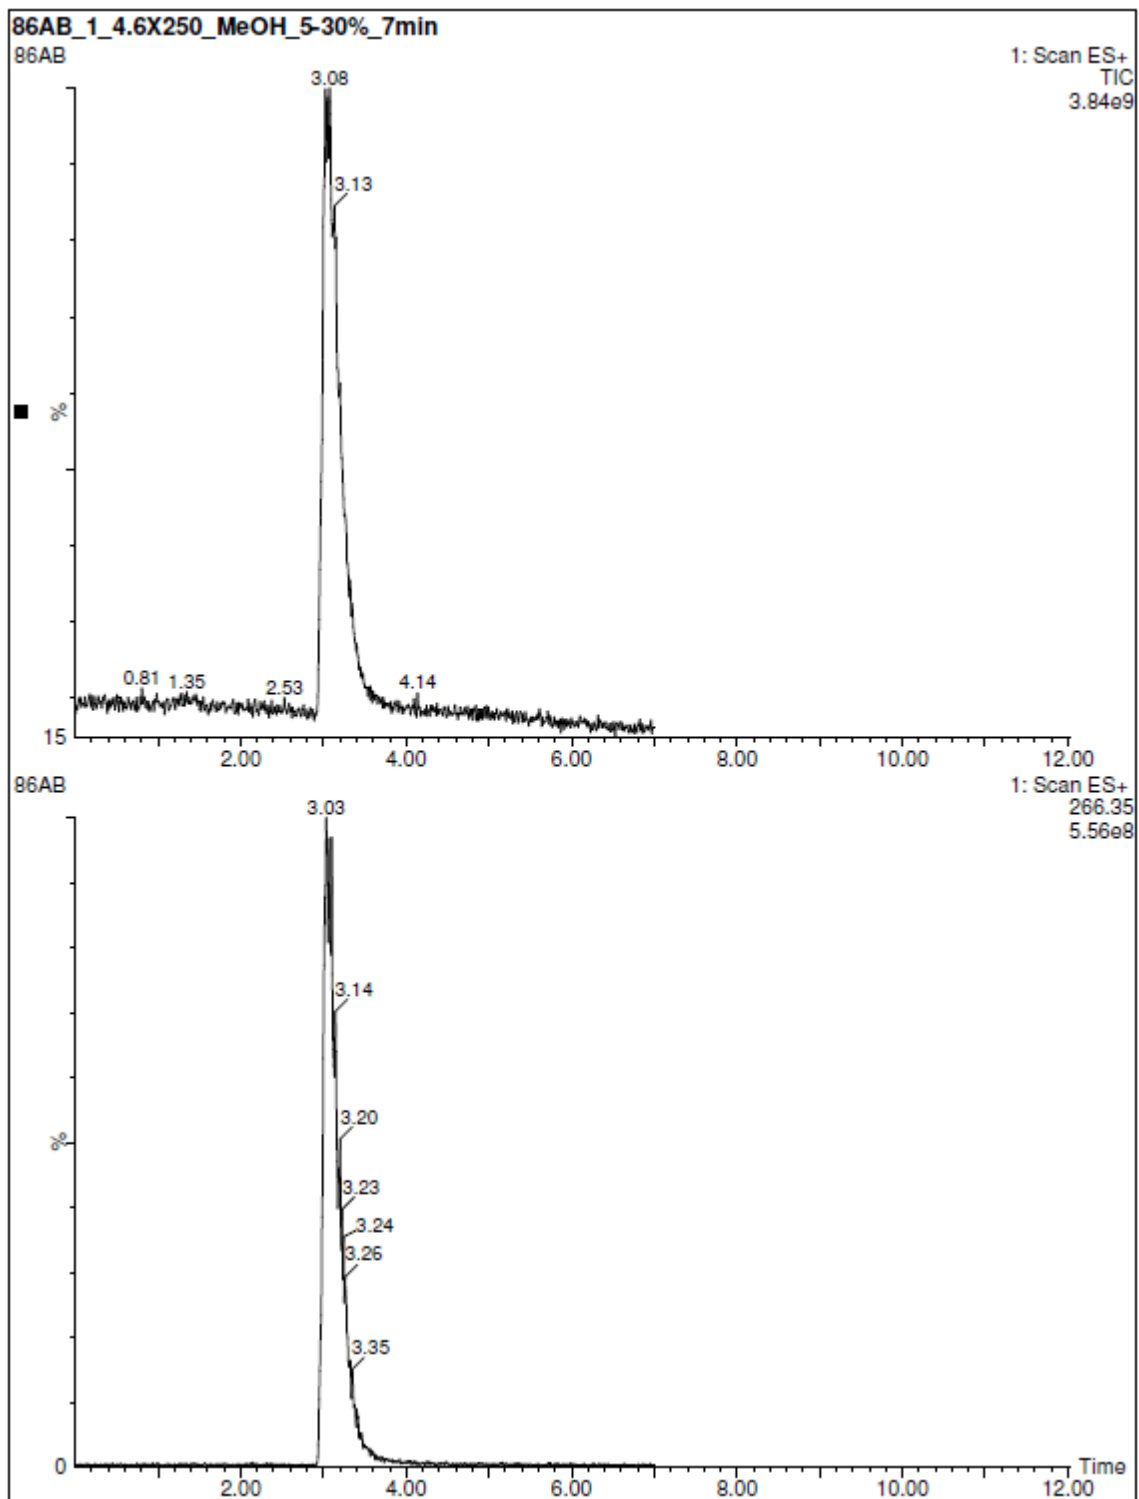



Compound 6c SFC-MS

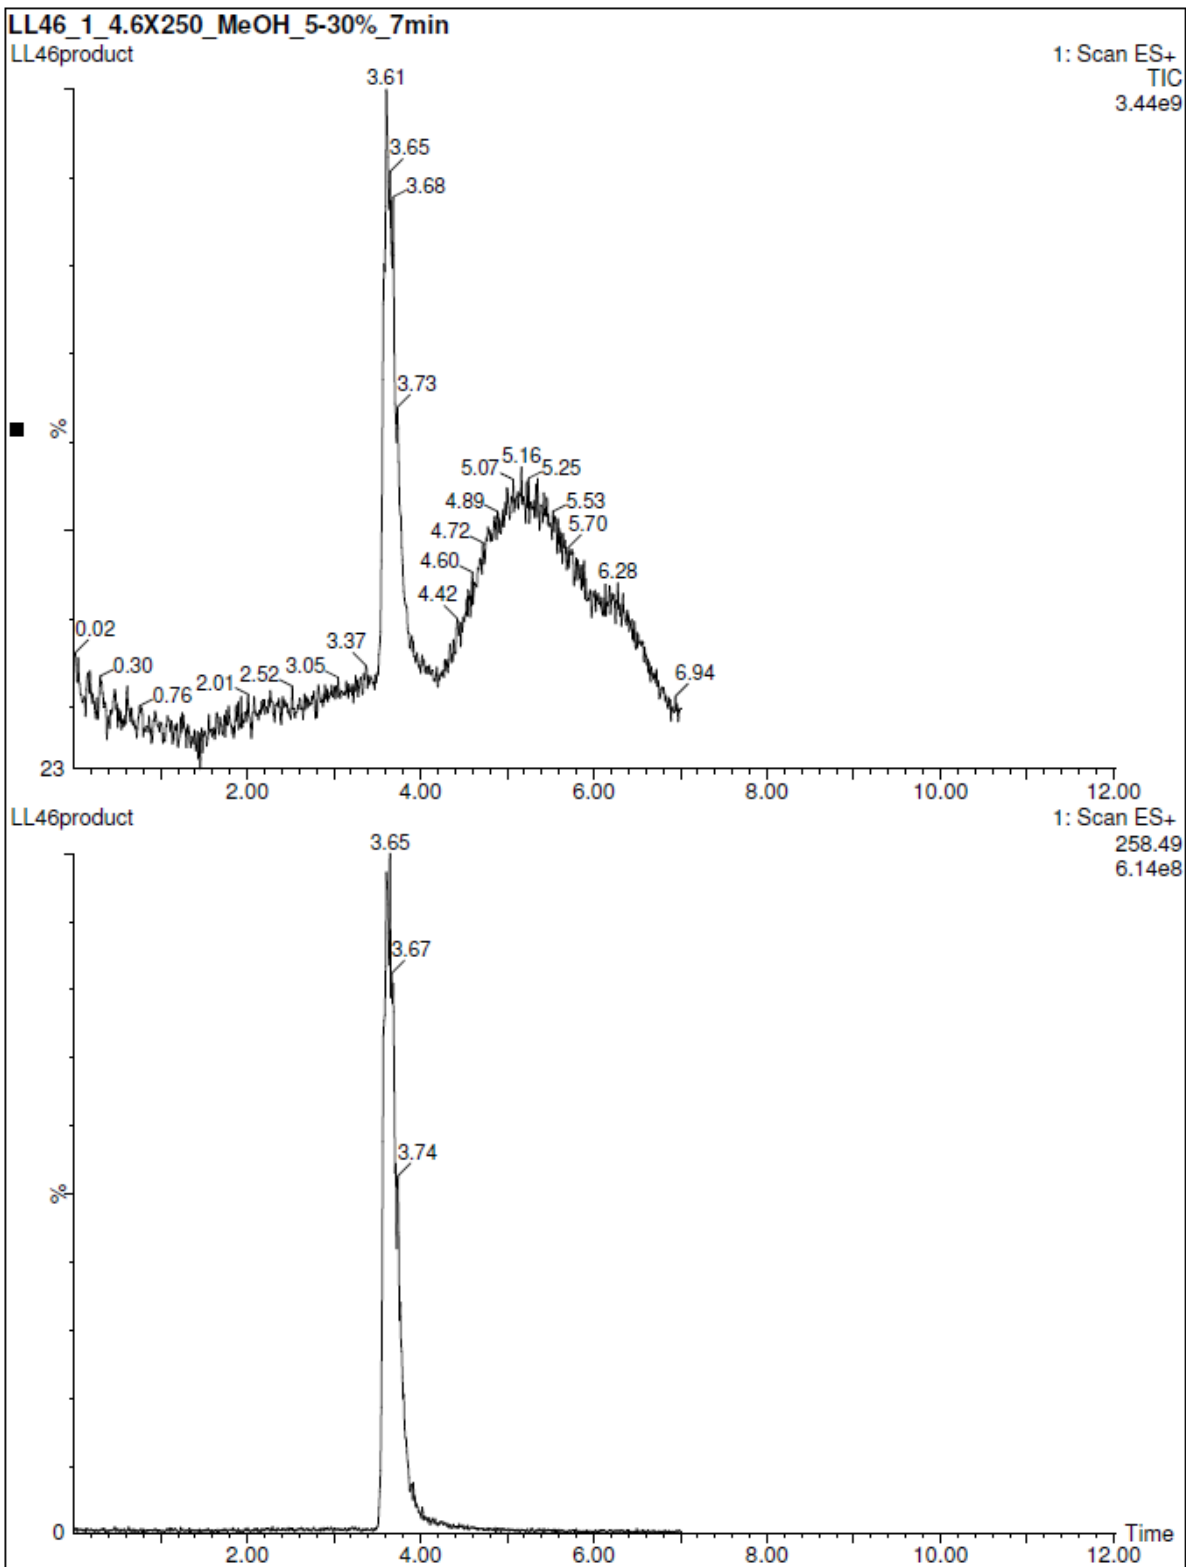

Compound **6d** SFC-MS

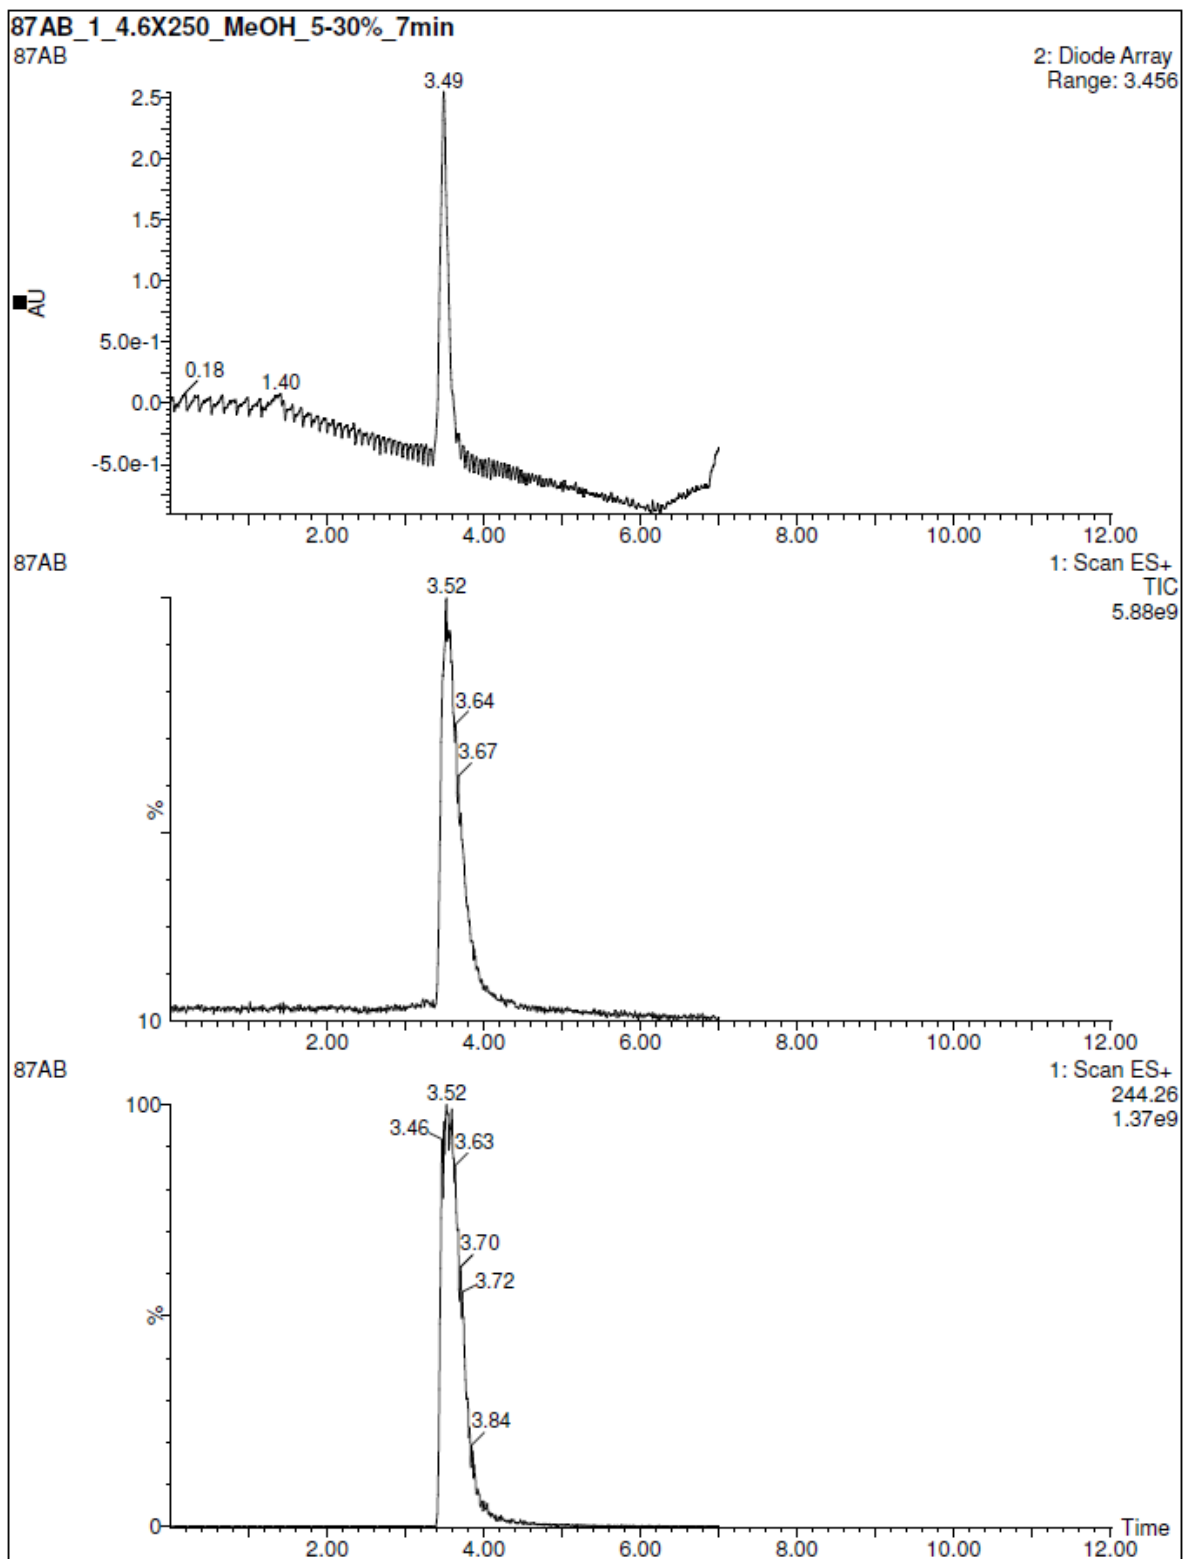

Compound 6e SFC-MS

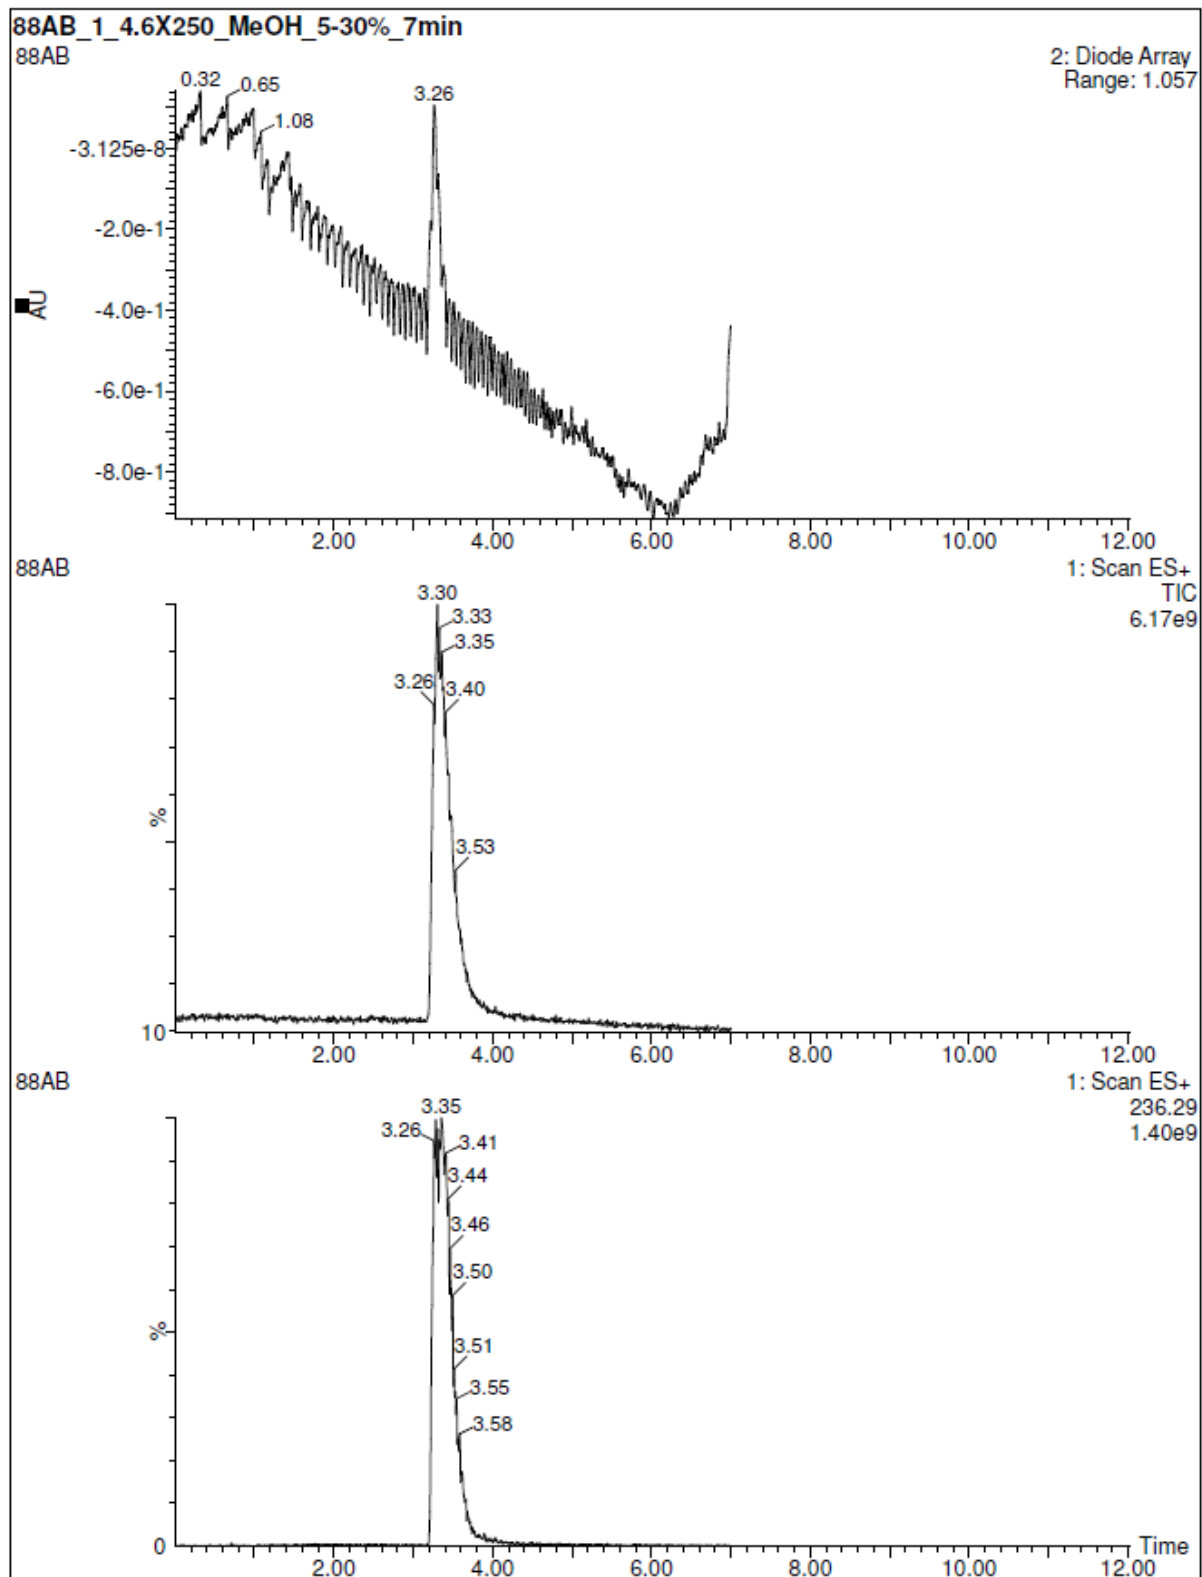

Compound **6f** SFC-MS

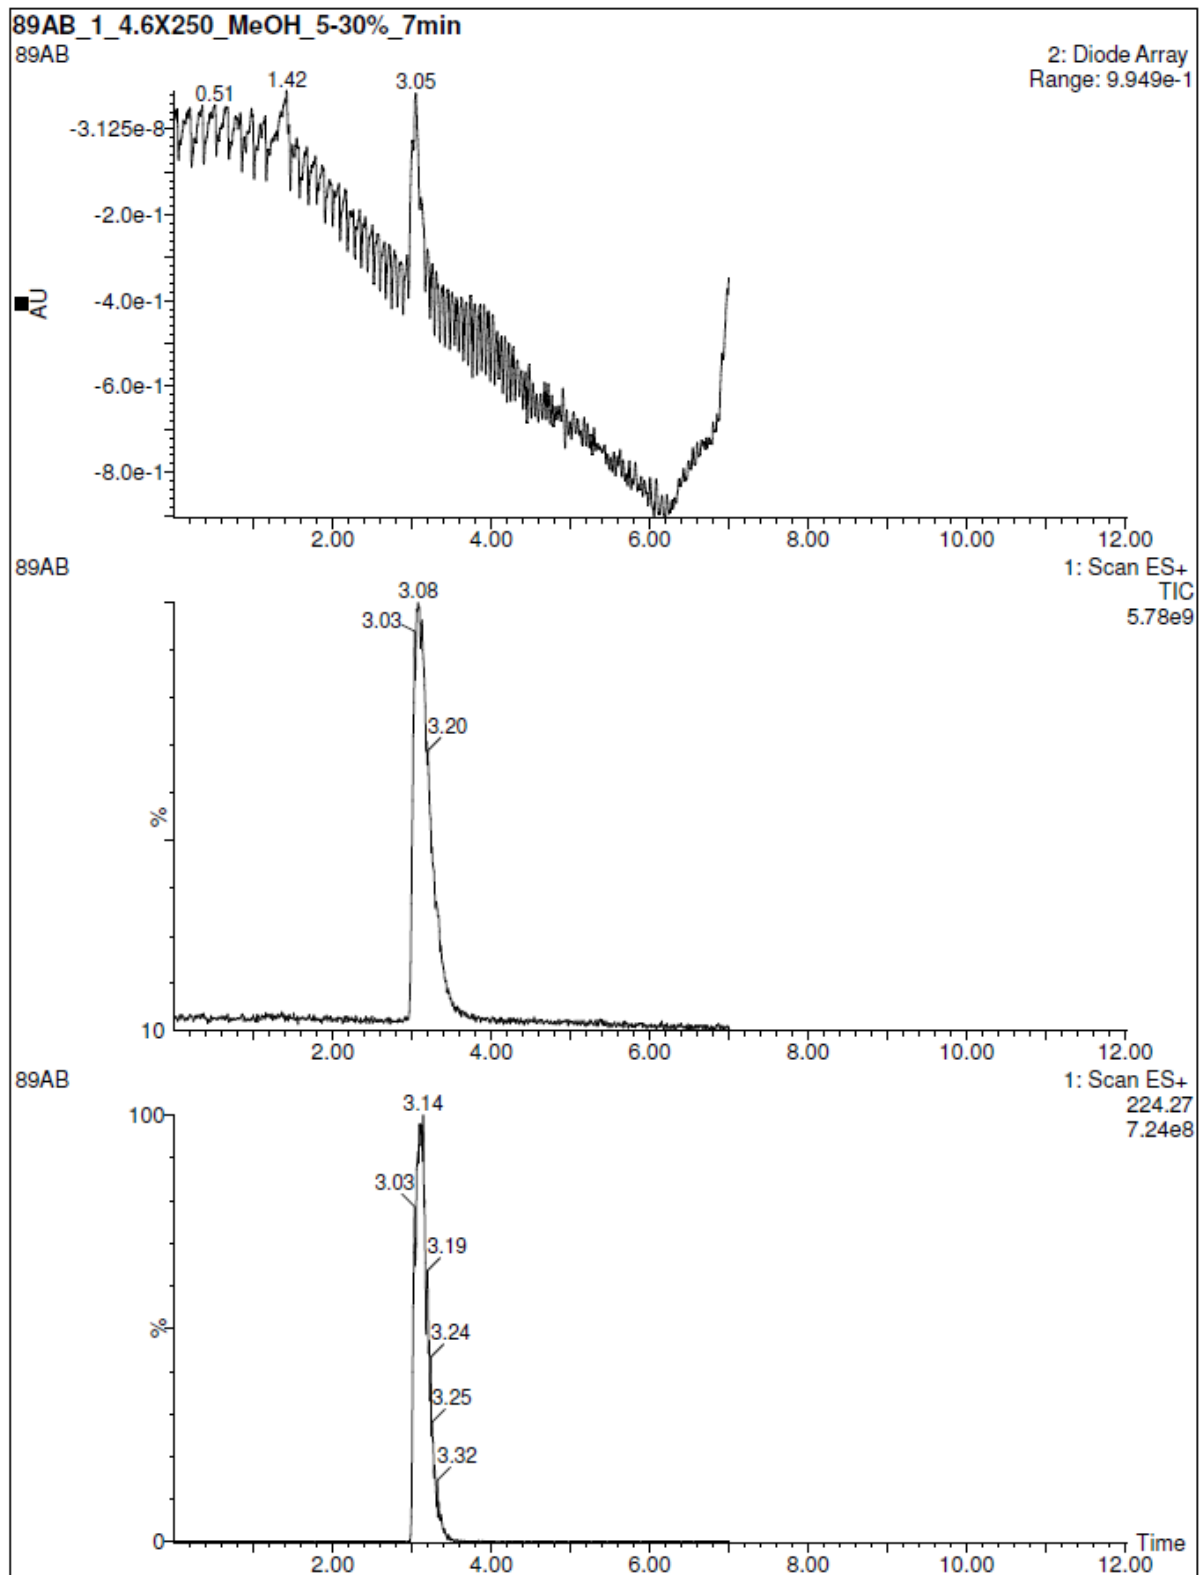

Compound 6g SFC-MS

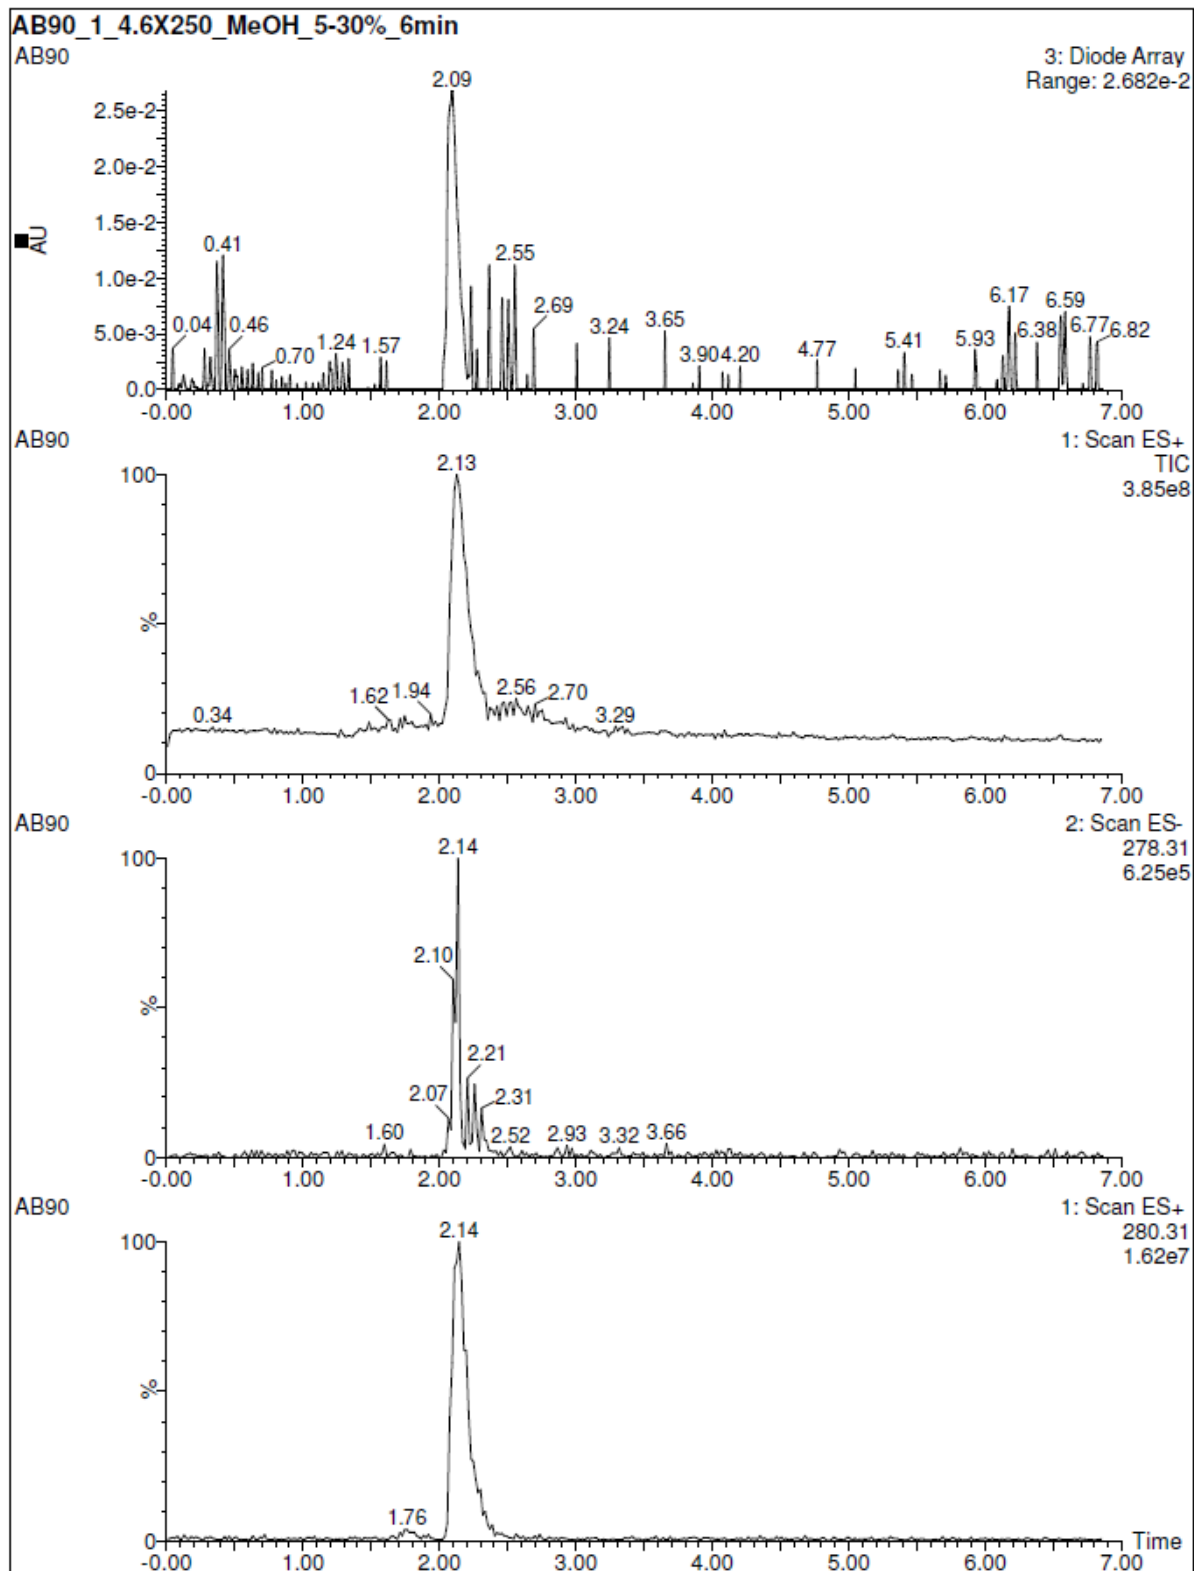

Compound 6h SFC-MS

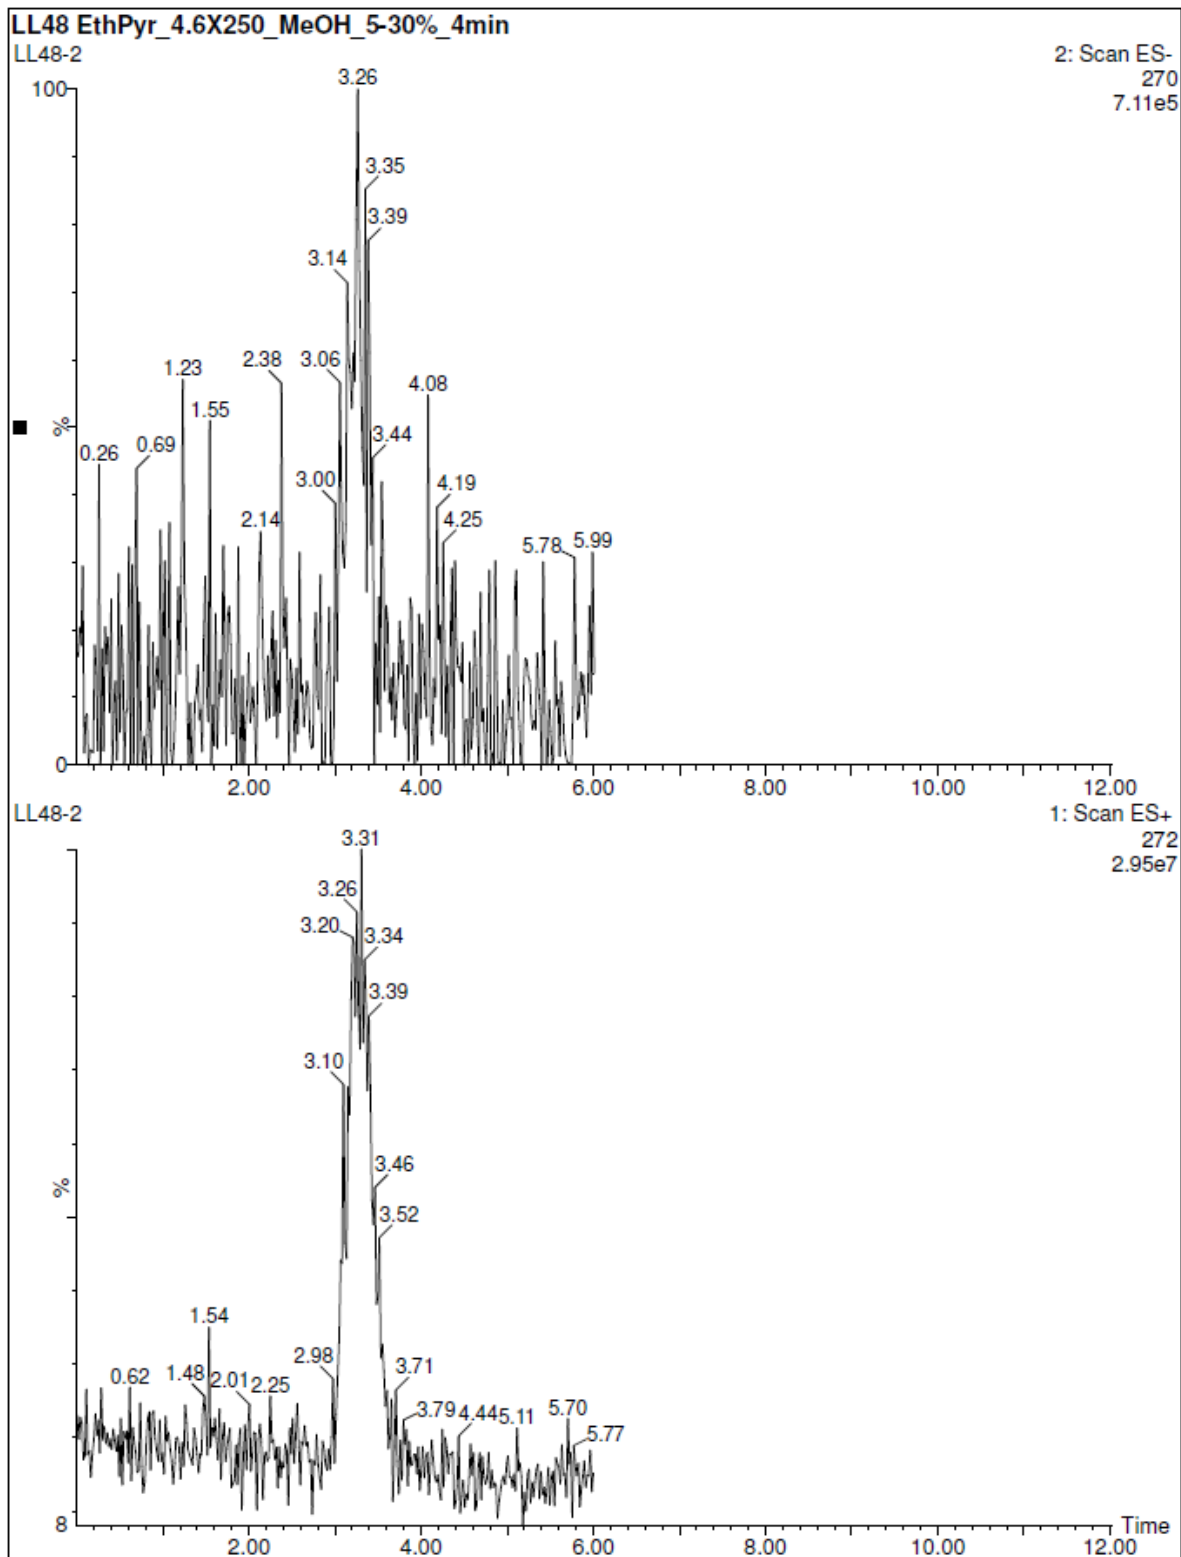

Compound 6i SFC-MS

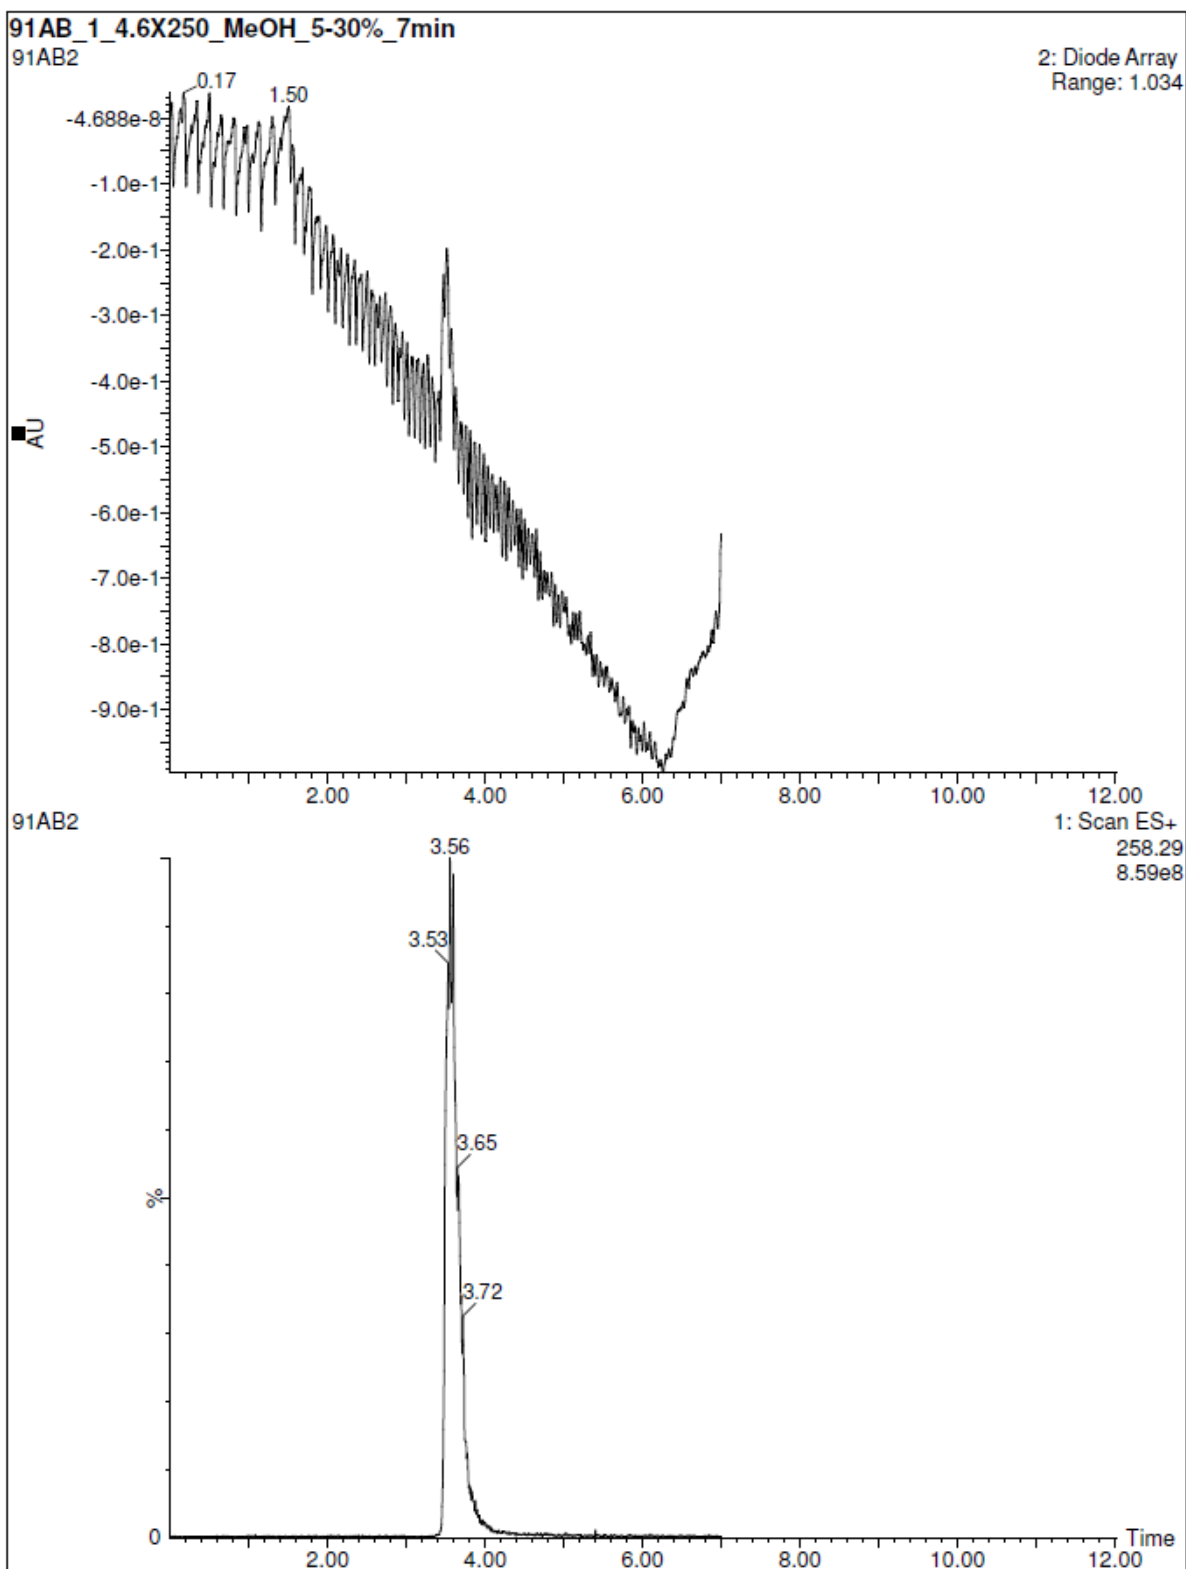

Compound 6j SFC-MS

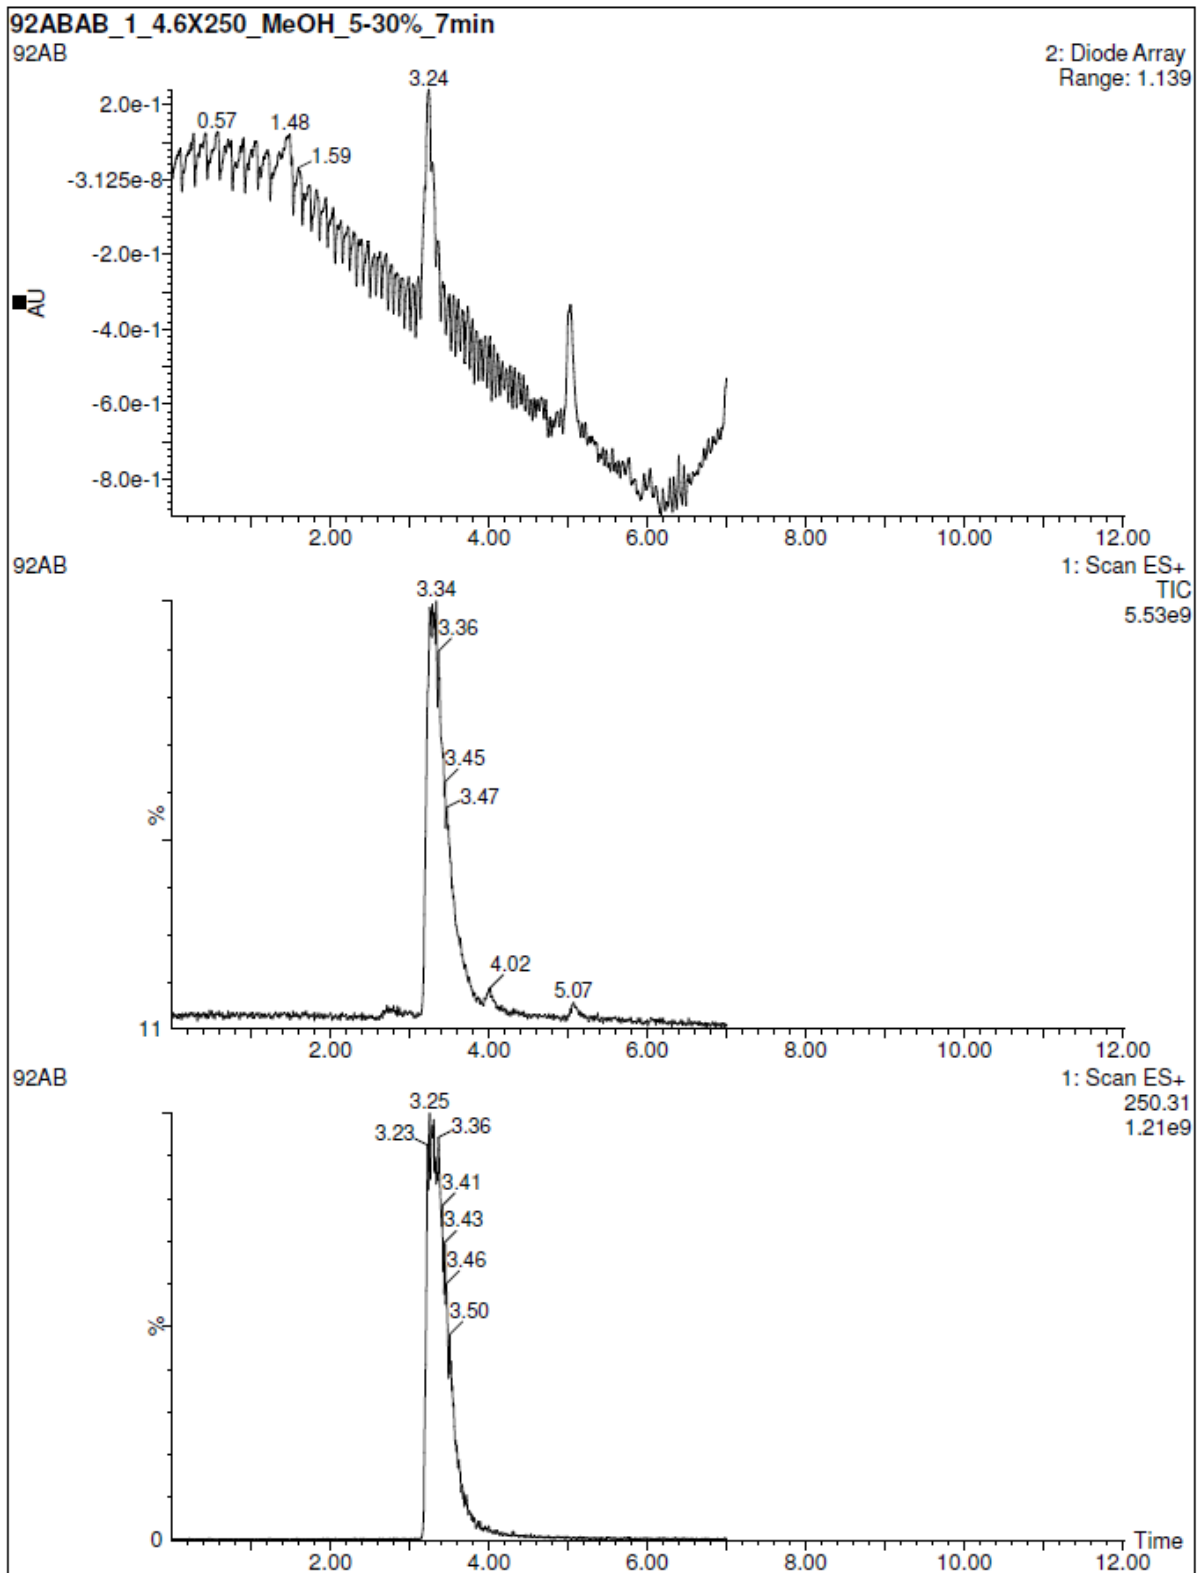



PDB Analysis – Interaction distances of gamma lactams found in the PDB database

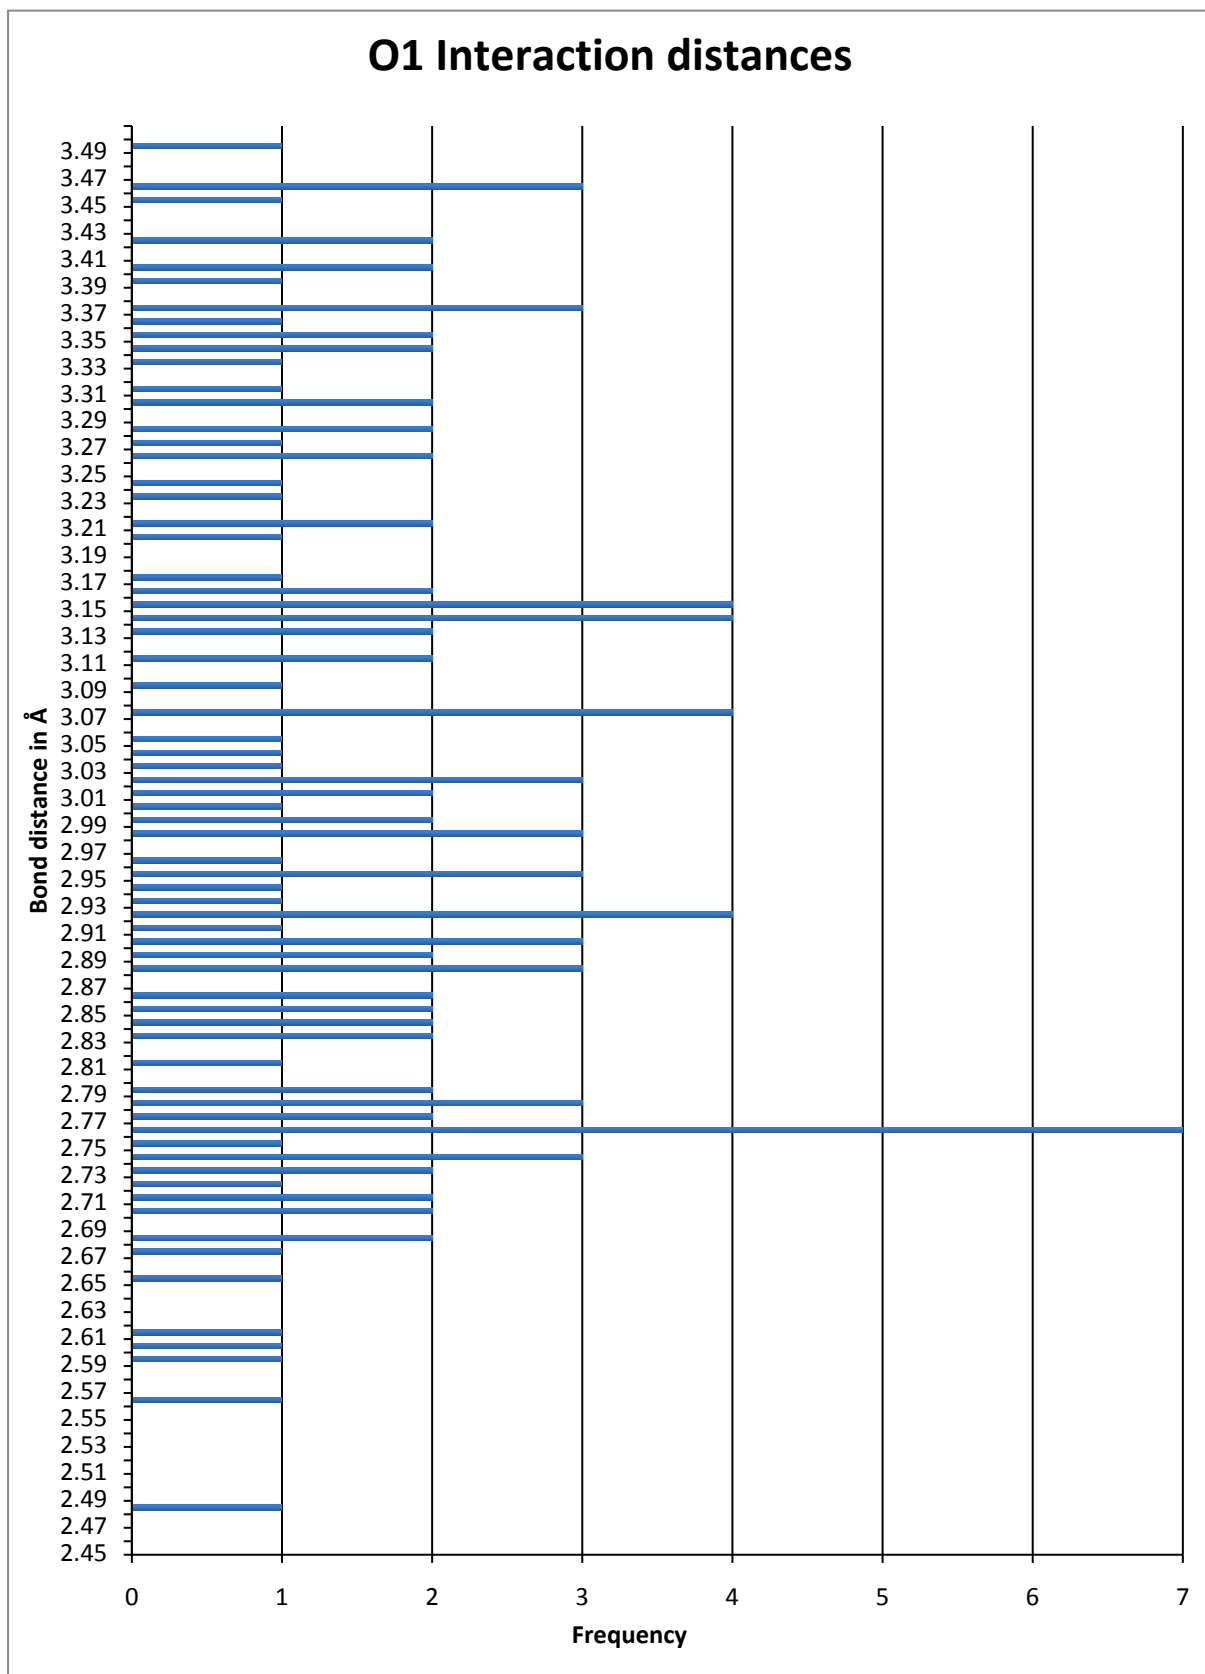

# N1 Interaction distances

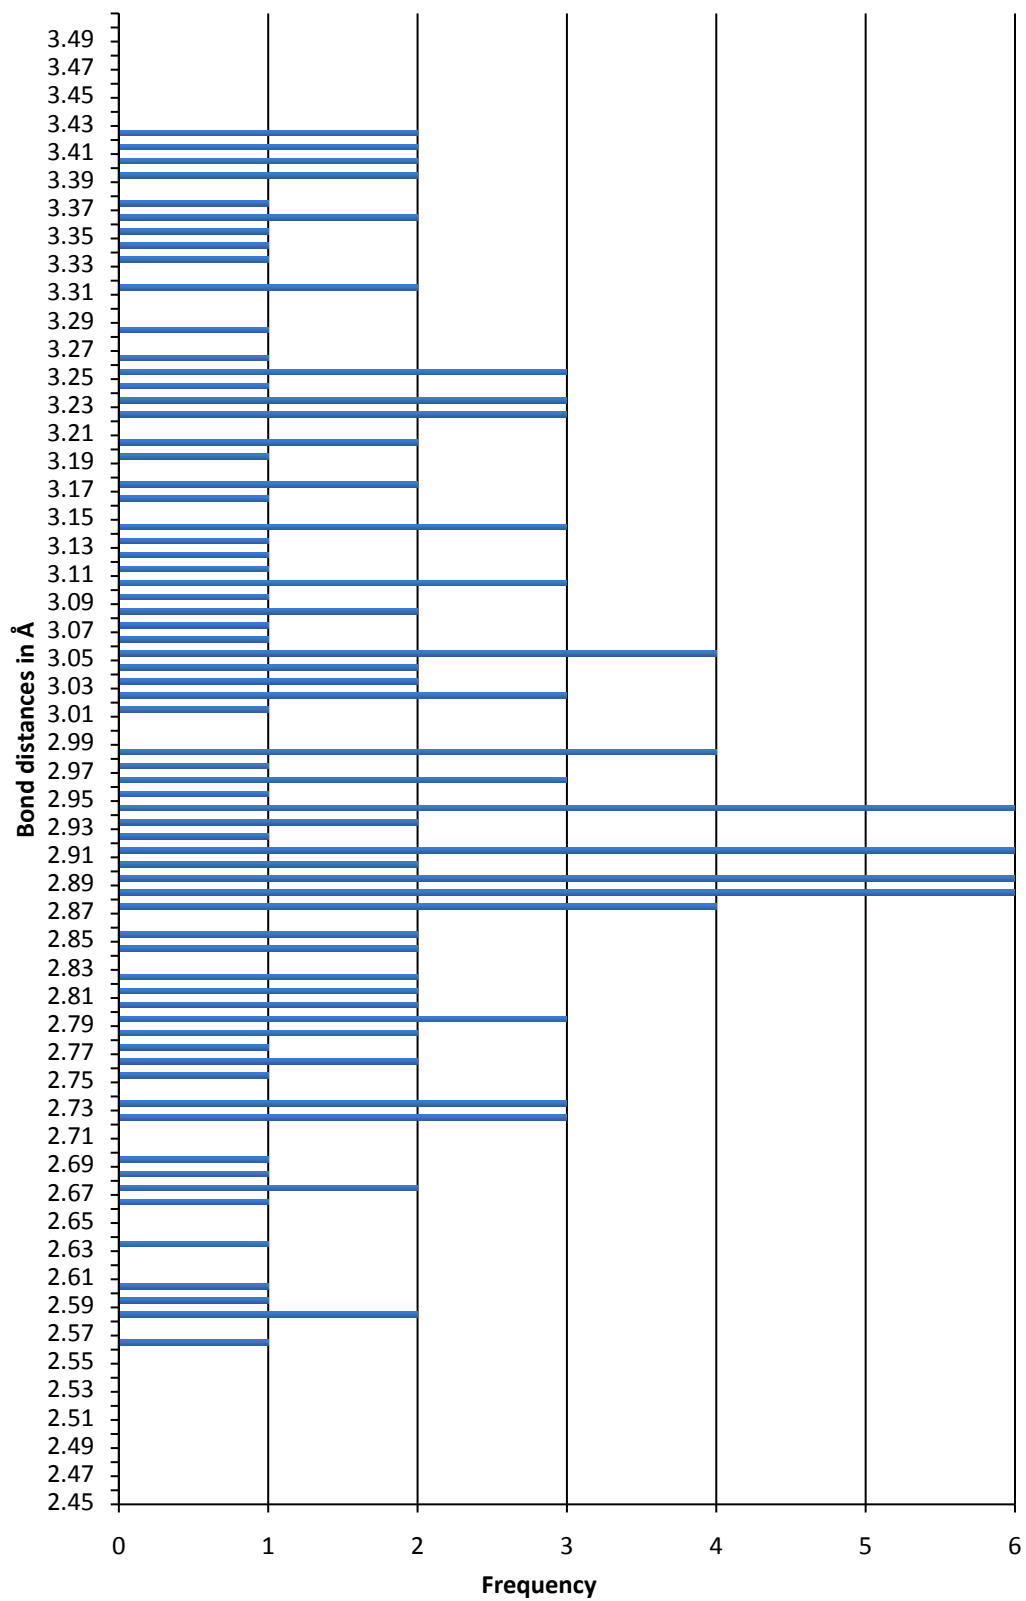

Supplement: c4md00162a1.pdf [file c4md00162a1.pdf]
